# Supplementary material
Source: Elsevier journal article supplement (https://cris.unibo.it/retrieve/723cf046-81b4-493f-be1b-91258847cc2b/mmc1.pdf)
Supplement: mmc1 [file mmc1.pdf]

# THE LANCET

## Supplementary appendix

This appendix formed part of the original submission and has been peer reviewed. We post it as supplied by the authors.

Supplement to: NIHR Global Health Unit on Global Surgery, COVIDSurg Collaborative. Elective surgery system strengthening: development, measurement, and validation of the surgical preparedness index across 1632 hospitals in 119 countries. *Lancet* 2022; published online Oct 31. [https://doi.org/10.1016/S0140-6736\(22\)01846-3](https://doi.org/10.1016/S0140-6736(22)01846-3).

**Supplementary table 1. Description of Surgical Preparedness Indicators to support hospital assessment**

| Surgical Preparedness Indicators                                                                                 | Description                                                                                                                                                                                                                                                                                                                                                                                                                                                                                                                                                                                                                                                                                                                                                                                                            |
|------------------------------------------------------------------------------------------------------------------|------------------------------------------------------------------------------------------------------------------------------------------------------------------------------------------------------------------------------------------------------------------------------------------------------------------------------------------------------------------------------------------------------------------------------------------------------------------------------------------------------------------------------------------------------------------------------------------------------------------------------------------------------------------------------------------------------------------------------------------------------------------------------------------------------------------------|
| <b>Facilities and consumables</b>                                                                                |                                                                                                                                                                                                                                                                                                                                                                                                                                                                                                                                                                                                                                                                                                                                                                                                                        |
| 1. Availability of ring-fenced (reserved) planned surgery theatres                                               | The ability of a hospital to ring-fence (i.e., reserve) theatres to use only for the planned operations during a period of external stress. This improves preparedness by ensuring that sufficient theatre space is available for planned surgery even if there is an increase in emergency surgery volume (e.g., falls risk during winter pressures, complications of endemic and pandemic diseases, high volume trauma).                                                                                                                                                                                                                                                                                                                                                                                             |
| 2. Availability of ring-fenced (reserved) planned surgery beds                                                   | The ability of a hospital to ring-fence (i.e., reserve) ward beds to be occupied only by patients before and/or after planned surgery during a period of external stress. This improves preparedness by ensuring that beds are available for preoperative optimisation and/or postoperative care of patients undergoing planned surgery when there is a higher than anticipated volume of hospital admissions (e.g., during an airborne or non-airborne pandemic, natural disaster, or extreme weather event).                                                                                                                                                                                                                                                                                                         |
| 3. Availability of ring-fenced (reserved) critical care beds for planned surgery                                 | The ability of a hospital to ring-fence (i.e., reserve) critical care beds to be occupied only by patients after planned surgery during a period of external stress. This improves preparedness by ensuring sufficient capacity for admission of patients that were at high baseline risk of surgical complications due to comorbid disease or operative severity, that have an intraoperative complication, or that deteriorate after surgery on a ward-based environment. Critical care services are put under pressures during a most external stressor scenarios, providing organ support and high-intensity care.                                                                                                                                                                                                 |
| 4. Flexibility to re-arrange hospital areas to provide a segregated pathway (separate areas) for planned surgery | The ability of a hospital to re-arrange clinical areas to provide separate areas of the hospital for delivery of pre-, intra- and post-operative care to planned surgical patients. This has two mechanisms of improving preparedness: (1) firstly, in concentrating expert perioperative staff and resources in areas where planned surgical patients are receiving care to improve efficiency and safety; (2) secondly, to reduce risk of nosocomial transmission of endemic and pandemic diseases from infected patients undergoing care in nearby areas (e.g., malaria, influenza, COVID-19, Ebola). Whilst perhaps most relevant to airborne and non-airborne pandemics, their risk increases during natural disasters, warfare and extreme weather events and can compound reduction in planned surgical volume. |
| 5. Access to diagnostics and interventions to identify and treat surgical complications                          | A hospital's capacity to provide: <ul style="list-style-type: none"> <li>• Urgent diagnostic tests including (and not limited to) haematology, biochemistry, microbiology, plain radiographs, endoscopy, computer tomography (CT) and magnetic resonance (MR) imaging.</li> <li>• Urgent postoperative interventions including (and not limited to) transfusion of blood and blood products, antimicrobial therapy, nutrition, reoperation, interventional radiology, and critical care services.</li> </ul> This improves preparedness by improving capacity to rescue, reducing severity of complications, in-hospital bed days and mortality for patients undergoing planned surgery.                                                                                                                               |
| 6. Reliable supply of electricity                                                                                | The reliability of a hospital's electricity supply when providing pre-, intra- and post-operative care to planned surgical patients. This can improve preparedness by ensuring care can be safely delivered when demand for electricity rises (i.e., increased number of hospital admissions and critical care) or supply falls (e.g., during political stability, natural disasters and extreme weather events).                                                                                                                                                                                                                                                                                                                                                                                                      |
| 7. Reliable supply of supplementary oxygen                                                                       | The reliability of a hospital's supply of supplemental oxygen available to deliver care to planned surgical patients. Supply and demand are likely to fluctuate during many external stress scenarios including for airborne pandemics such as COVID-19 or influenza, non-airborne pandemics for patients presenting with sepsis, high volume trauma, and lower respiratory tract infection during extreme weather events.                                                                                                                                                                                                                                                                                                                                                                                             |
| 8. Reliable supply and management of essential perioperative drugs                                               | The reliability of a hospital's supply of essential perioperative medications available to deliver care to planned surgical patients. These may relate to different aspects of pre-, intra-, and post-operative care, and are likely to fluctuate between operation types, from patient to patient and across different surgical specialties. This improves preparedness by ensuring key drugs for induction and maintenance of anaesthesia, perioperative pain relief, multi-relaxation, and other essential aspects of perioperative care can be delivered in line with local practice. Again, demand and supply may fluctuate across a wide range of external stressors.                                                                                                                                            |

|                                                                                                        |                                                                                                                                                                                                                                                                                                                                                                                                                                                                                                                                                                                                                                                                                                                                                                                                                                                                                                                                                                                                                                                                                                                                                                                                                                                                                      |
|--------------------------------------------------------------------------------------------------------|--------------------------------------------------------------------------------------------------------------------------------------------------------------------------------------------------------------------------------------------------------------------------------------------------------------------------------------------------------------------------------------------------------------------------------------------------------------------------------------------------------------------------------------------------------------------------------------------------------------------------------------------------------------------------------------------------------------------------------------------------------------------------------------------------------------------------------------------------------------------------------------------------------------------------------------------------------------------------------------------------------------------------------------------------------------------------------------------------------------------------------------------------------------------------------------------------------------------------------------------------------------------------------------|
| 9. Reliable supply and management of devices and implants                                              | The reliability of a hospital's supply of devices and implants for planned surgical patients. The necessity, type and volume of devices and implants is likely to vary substantially by specialty and by local training and standards of practice. For some operations, a procedure will not be able to be performed without an essential device of implant, whilst for others an implant or device may improve the quality or completeness of the operation, but another approach is feasible. Surgical systems with a reliable supply of devices and implants will be less likely to have cancellations in the event of fluctuating supply and demand across a wide range of external stressors.                                                                                                                                                                                                                                                                                                                                                                                                                                                                                                                                                                                   |
| 10. Sufficient surgical instrument and local sterilisation processes                                   | The ability of a hospital to maintain sufficient supplies of surgical instruments required for the local case-mix of planned surgery; the volume and types of surgical instruments required are likely to vary significantly from hospital to hospital and specialty to specialty. This includes the availability and resilience of sterilisation processes for reusable instruments and devices. This improves preparedness by preventing cancellations or unsafe surgery due to the unavailability of critical equipment to complete a planned procedure.                                                                                                                                                                                                                                                                                                                                                                                                                                                                                                                                                                                                                                                                                                                          |
| 11. Availability of protective measures for theatre teams                                              | <p>Availability of protective measures for theatre teams, including surgical, anaesthesia and operating theatre nurse and support staff. This includes any measures required for teams to perform planned surgery safely and may vary across different external system stressors. These could include:</p> <ul style="list-style-type: none"> <li>• Personal protective equipment to prevent spread of bloodborne, droplet and airborne pathogens associated with occupational risk such as surgical gowns, hats, face masks, shoes, and theatre scrubs</li> <li>• Appropriate services for testing (and vaccination where possible) for diseases with occupation risks such as Hepatitis B and C, HIV, and pandemic or endemic diseases such as COVID-19, influenza, or malaria.</li> <li>• Security measures to protect staff from threat of physical or psychological harm (e.g., during periods of political or social unrest)</li> <li>• Structural measures in the theatre itself to protect staff from harm in the event of a natural disaster or extreme weather event.</li> </ul> <p>Surgery and anaesthesia cannot be delivered without adequate, trained staffing and these measures improve preparedness by reducing staff sickness, injury and improving retention.</p> |
| <b>Staffing</b>                                                                                        |                                                                                                                                                                                                                                                                                                                                                                                                                                                                                                                                                                                                                                                                                                                                                                                                                                                                                                                                                                                                                                                                                                                                                                                                                                                                                      |
| 12. Ability to redistribute staff (within and between hospitals) to maintain planned surgical capacity | The ability of a hospital to redistribute staff within and between hospitals to maintain planned surgery and anaesthesia services. Redistribution of staff can be required to cover staff absence or redeploy workforce across multiple perioperative care areas such as admission areas, theatres, critical care, and surgical wards. Higher absenteeism rates would be anticipated during most periods of external system stress, due to higher levels of physical sickness (e.g., airborne, non-airborne pandemics, extreme weather) and psychological stress (e.g., warfare, natural disasters).                                                                                                                                                                                                                                                                                                                                                                                                                                                                                                                                                                                                                                                                                 |
| 13. Ring-fenced (reserved) teams to provide planned surgical care                                      | The ability of a hospital to ring-fence (i.e., reserve) teams along the perioperative pathway to support delivery of planned operations during a period of external stress. This improves preparedness by ensuring that sufficient staffing is available even where there are increased demands on other hospital services which may otherwise require redeployment or retraining of surgical staff (e.g., pandemic diseases, natural disasters, extreme weather) or higher than anticipated volumes of emergency surgery (e.g., falls during cold weather extremes, high volume trauma during periods of political instability).                                                                                                                                                                                                                                                                                                                                                                                                                                                                                                                                                                                                                                                    |
| <b>Prioritisation</b>                                                                                  |                                                                                                                                                                                                                                                                                                                                                                                                                                                                                                                                                                                                                                                                                                                                                                                                                                                                                                                                                                                                                                                                                                                                                                                                                                                                                      |
| 14. Cross-specialty patient prioritisation for surgery                                                 | The ability of a hospital to prioritise patients for planned surgical procedures across multiple specialties using locally, regionally, or nationally defined criteria. These could be based for example on individual patient risk, condition-specific risks of delay, or effectiveness (or cost-effectiveness) of surgical intervention. During periods of external pressure, a robust prioritisation system that works across surgical providers in the hospital will ensure that surgical pathways are used effectively and for patients that will benefit most and/or be least likely to have their surgery cancelled during periods of external stress. This may change dynamically over time and from theatre to theatre or hospital to hospital.                                                                                                                                                                                                                                                                                                                                                                                                                                                                                                                             |
| 15. Ability to identify and cancel procedures of limited clinical value (non-essential surgery)        | Ability of hospitals to identify patients who have been booked for procedures of limited clinical value and cancel or delay these to provide planned surgical capacity for patients that will benefit most and/or be least likely to have their surgery cancelled during periods of external stress. This value judgment can be locally, regionally, or nationally defined and based on criteria related to individual patients' risk and likely effectiveness of surgical intervention. This will improve preparedness                                                                                                                                                                                                                                                                                                                                                                                                                                                                                                                                                                                                                                                                                                                                                              |

|                                                                                                  |                                                                                                                                                                                                                                                                                                                                                                                                                                                                                                                                                                                                                                                                                                                                                                                            |
|--------------------------------------------------------------------------------------------------|--------------------------------------------------------------------------------------------------------------------------------------------------------------------------------------------------------------------------------------------------------------------------------------------------------------------------------------------------------------------------------------------------------------------------------------------------------------------------------------------------------------------------------------------------------------------------------------------------------------------------------------------------------------------------------------------------------------------------------------------------------------------------------------------|
|                                                                                                  | by stabilising demand on planned surgical services during periods of external pressure and protecting services and staffing for patients that need them most.                                                                                                                                                                                                                                                                                                                                                                                                                                                                                                                                                                                                                              |
| <b>Systems</b>                                                                                   |                                                                                                                                                                                                                                                                                                                                                                                                                                                                                                                                                                                                                                                                                                                                                                                            |
| 16. Formal operational plan to continue planned surgery during periods of external system stress | The availability of a formal plan to continue planned surgery during periods of system stress and ability of the hospital to operationalise this to protect planned surgical capacity. This improves preparedness by galvanising a whole-service approach to facilities, staffing, prioritisation and systems before a high-stress external event occurs. Plans should be individualised to the external stressor scenario (e.g., airborne pandemic, warfare, extreme heat) as scenario-specific factors and mediators should be considered. In the absence of experiencing the specific external stressor in question, the frequency, quality, and level engagement of simulated scenarios could be used as a surrogate measure of the ability of a hospital to operationalise this plan. |
| 17. Ability to conduct preoperative assessment in the community                                  | Ability of a surgery and anaesthesia service to conduct pre-operative assessment in the community. This could include blood tests, electrocardiography, lung function tests or any other measure for preoperative risk stratification in the community. This improves preparedness by reducing pressure on hospital inpatient and outpatient services during periods with higher level of hospital assessments and admissions which could otherwise be prioritised at the expense of preoperative assessments before planned surgery.                                                                                                                                                                                                                                                      |
| 18. Access to preoperative testing for endemic and epidemic diseases                             | Ability of a surgery and anaesthesia service to provide preoperative testing for endemic and epidemic diseases for patients at risk. This could include endemic (e.g., malaria, dengue fever), epidemic and pandemic diseases (e.g., influenza, COVID-19). This improves preparedness by reducing likelihood of surgical cancellations and/or nosocomial transmission to staff members or other patients awaiting planned surgery.                                                                                                                                                                                                                                                                                                                                                         |
| 19. Ability to transfer patients to another hospital with greater capacity                       | Ability of a hospital network to transfer care of a patient awaiting planned surgery away from their booking hospital to another hospital with greater capacity. This improves preparedness by temporarily redirecting selected patients to centres with different services, that are facing less severe external pressures or to support continuation of planned surgery for another group where different specialties are disproportionately affected by a crisis.                                                                                                                                                                                                                                                                                                                       |
| 20. Ability to facilitate timely discharges                                                      | Ability of a hospital to identify patients that are medically fit for discharge and facilitate their discharge back into the community. This improves preparedness by reducing pressure on hospital beds and staffing to free space for patients awaiting planned surgery. It is likely to require multidisciplinary involvement which may be different between different patients, hospitals, and settings.                                                                                                                                                                                                                                                                                                                                                                               |
| 21. Social support system to facilitate safe discharge                                           | Capacity of a surgery and anaesthesia service to provide social support in the community to patients after discharge. This supports holistic care for patients at the point of discharge and prevents blocks to their return to community care. This indicator encompasses a system-level approach to <i>Indicator 20. Ability of hospitals to facilitate timely discharges</i> .                                                                                                                                                                                                                                                                                                                                                                                                          |
| 22. Capacity to use telephone or video calls for outpatient appointments                         | A hospital's capacity to provide remote monitoring services such as telephone or video calls for outpatient assessment or consultation before and after surgery. This improves preparedness by reducing pressure on hospital outpatient services during periods with high system pressure where areas or staff could be redeployed to other clinical areas. It also allows outpatient services to continue where there are safety concerns with hospital visitation (e.g., during airborne or non-airborne pandemics, natural disasters or extreme weather conditions).                                                                                                                                                                                                                    |
| 23. Capacity and capability to communicate with family members                                   | Capacity (i.e., time and staff availability) and capability (i.e., technical infrastructure, private space) to communicate (remotely or in-person) with family members to provide update on care of patients undergoing planned surgery. This improves preparedness by supporting holistic and patient-centred care even during periods with safety (e.g., pandemics, political instability), logistical (e.g., long travel distances or cost during economic recession) or comfort (e.g., extreme weather) concerns for family members.                                                                                                                                                                                                                                                   |

**Supplementary table 2. Summary of international consultation (Delphi consensus Round 1 and 3 voting)**

| Short-hand indicator      | Indicator text (Round 1 voting)                                                                                       | Round 1 voting |                 | Round 1 Outcome <sup>a</sup> | Round 3 voting |           |        | Round 3 Outcome |
|---------------------------|-----------------------------------------------------------------------------------------------------------------------|----------------|-----------------|------------------------------|----------------|-----------|--------|-----------------|
|                           |                                                                                                                       | Importance     | Easy to measure |                              | Essential      | Desirable | Remove |                 |
| Ring-fenced theatres      | Availability of ring-fenced (reserved) elective surgery theatres                                                      | 83.33          | 79.32           | Accepted after Round 1       | -              | -         | -      | Include         |
| Ring-fenced beds          | Availability of ring-fenced (reserved) elective surgery beds                                                          | 80.82          | 73.97           | Accepted after Round 1       | -              | -         | -      | Include         |
| Ring-fenced critical care | Availability of ring-fenced (reserved) critical care beds for elective surgery                                        | 78.89          | 73.21           | Accepted after Round 1       | -              | -         | -      | Include         |
| Flexible areas            | Flexibility to rearrange hospital areas to provide a segregated pathway for elective patients                         | 79.79          | 79.79           | Accepted after Round 1       | -              | -         | -      | Include         |
| Managing complications    | Access to diagnostics and interventions to identify and treat surgical complications                                  | 85.45          | 70.88           | Accepted after Round 1       | -              | -         | -      | Include         |
| Electricity supply        | Reliable supply of electricity                                                                                        | 92.47          | 83.61           | Accepted after Round 1       | -              | -         | -      | Include         |
| Oxygen supply             | Reliable supply of supplementary oxygen                                                                               | 94.50          | 81.71           | Accepted after Round 1       | -              | -         | -      | Include         |
| Drug supply               | Reliable supply and management of essential perioperative drugs                                                       | 92.48          | 76.27           | Accepted after Round 1       | -              | -         | -      | Include         |
| Device supply             | Reliable supply and management of devices and implants                                                                | 82.21          | 72.70           | Accepted after Round 1       | -              | -         | -      | Include         |
| Sterilisation             | Sufficient surgical instrument and local sterilisation processes                                                      | 92.76          | 75.64           | Accepted after Round 1       | -              | -         | -      | Include         |
| Protective equipment      | Availability of personal protective equipment for theatre teams (including testing & vaccination)                     | 89.39          | 71.98           | Accepted after Round 1       | -              | -         | -      | Include         |
| Staff redistribution      | Ability to redistribute staff (within and between hospitals) to maintain capacity                                     | 79.89          | 60.09           | Progress to Round 3 voting   | 67.6%          | 25.0%     | 7.4%   | Include         |
| Ring-fenced teams         | Ring-fenced (reserved) teams to provide elective surgical care                                                        | 77.03          | 64.98           | Progress to Round 3 voting   | 55.9%          | 36.8%     | 7.4%   | Include         |
| Staff wellbeing           | Access to counselling and supportive services for staff wellbeing                                                     | 69.41          | 57.00           | Progress to Round 3 voting   | 41.2%          | 45.6%     | 13.2%  | Exclude         |
| Staff absence             | Ability to cover staff absence                                                                                        | 87.21          | 66.64           | Progress to Round 3 voting   | 70.6%          | 23.5%     | 5.9%   | Include         |
| Digital referrals         | Use of paperless systems for new patient referrals                                                                    | 64.97          | 68.61           | Progress to Round 3 voting   | 25.0%          | 57.4%     | 17.6%  | Exclude         |
| Remote outpatients        | Capacity to use telephone or video calls for outpatients appointments                                                 | 77.05          | 73.35           | Accepted after Round 1       | -              | -         | -      | Include         |
| Patient prioritisation    | Cross-specialty surgical patient prioritisation system                                                                | 78.86          | 60.24           | Progress to Round 3 voting   | 50.0%          | 44.1%     | 5.9%   | Include         |
| Procedure prioritisation  | Ability to identify and cancel procedures of limited clinical value                                                   | 82.24          | 60.83           | Progress to Round 3 voting   | 70.6%          | 27.9%     | 1.5%   | Include         |
| Digital planning          | Access to a digital theatre planning system that optimises theatre usage                                              | 67.65          | 66.42           | Progress to Round 3 voting   | 23.5%          | 64.7%     | 11.8%  | Exclude         |
| Formal plan               | Formal plan to continue elective surgery during periods of increased pressure                                         | 87.30          | 74.36           | Accepted after Round 1       | -              | -         | -      | Include         |
| Digital assessment        | Capacity for digital (virtual) preoperative assessment                                                                | 68.83          | 68.83           | Progress to Round 3 voting   | 25.0%          | 63.2%     | 11.8%  | Exclude         |
| Preoperative assessment   | Ability to conduct preoperative testing (e.g. blood tests, ECG) away from an acute site hospital                      | 75.80          | 72.38           | Accepted after Round 1       | -              | -         | -      | Include         |
| Preoperative testing      | Access to routine preoperative testing for endemic/epidemic diseases (e.g., malaria, influenza, COVID-19)             | 90.42          | 81.92           | Accepted after Round 1       | -              | -         | -      | Include         |
| Hospital transfer         | Access to a hospital network to transfer care of elective surgery patients to a linked hospital with greater capacity | 78.00          | 65.32           | Progress to Round 3 voting   | 58.8%          | 38.2%     | 2.9%   | Include         |
| Timely discharge          | Access to procedures and technologies to facilitate timely discharges                                                 | 78.08          | 60.94           | Progress to Round 3 voting   | 42.6%          | 50.0%     | 7.4%   | Discussion      |
| Social support            | Social support system to facilitate safe discharge                                                                    | 81.21          | 61.92           | Progress to Round 3 voting   | 41.2%          | 49.2%     | 9.6%   | Discussion      |
| Family communication      | Capacity to communicate with family members during periods of restricted hospital visiting                            | 79.65          | 68.00           | Progress to Round 3 voting   | 47.1%          | 47.1%     | 5.9%   | Discussion      |
| Post-discharge care       | Capacity to provide post-discharge care in the community (e.g. health workers)                                        | 77.29          | 58.55           | Progress to Round 3 voting   | 47.1%          | 38.2%     | 14.7%  | Exclude         |
| Policy communication      | Capacity to communicate with decision makers to adapt surgical services                                               | 83.05          | 48.77           | Progress to Round 3 voting   | 51.5%          | 36.8%     | 11.8%  | Exclude         |
| Colleague communication   | Availability of a communication pathway that reaches all the professionals involved in surgical care                  | 80.09          | 54.79           | Progress to Round 3 voting   | 48.5%          | 35.3%     | 16.2%  | Exclude         |
| Financing                 | Clear financing mechanism to support elective surgery                                                                 | 78.39          | 51.52           | Progress to Round 3 voting   | 48.5%          | 33.8%     | 17.6%  | Exclude         |

Round 2 (iterative development and discussion) did not include voting by the development group so is omitted here.

**Supplementary table 3. Summary of international consultation (Delphi consensus Round 4 discussion)**

| Shorthand                 | Round 3 virtual survey results                                                                                                  | Round 4 focus group discussion                                                                                                                                                                                   | Final agreed indicators                                                                                          |
|---------------------------|---------------------------------------------------------------------------------------------------------------------------------|------------------------------------------------------------------------------------------------------------------------------------------------------------------------------------------------------------------|------------------------------------------------------------------------------------------------------------------|
| Ring-fenced theatres      | Availability of ring-fenced (reserved) elective surgery theatres                                                                | Identified need to explain definition of ring-fenced in subtext.                                                                                                                                                 | 1. Availability of ring-fenced (reserved) planned surgery theatres                                               |
| Ring-fenced beds          | Availability of ring-fenced (reserved) elective surgery beds                                                                    | Identified need to explain definition of ring-fenced in subtext.                                                                                                                                                 | 2. Availability of ring-fenced (reserved) planned surgery beds                                                   |
| Ring-fenced critical care | Availability of ring-fenced (reserved) critical care beds for elective surgery                                                  | Identified need to explain definition of ring-fenced in subtext.                                                                                                                                                 | 3. Availability of ring-fenced (reserved) critical care beds for planned surgery                                 |
| Flexible areas            | Flexibility to rearrange hospital areas to provide a segregated pathway for elective patients                                   | Agreed with wording, considered to improve clarity of pathway to ensure clear that separate areas should be provided.                                                                                            | 4. Flexibility to re-arrange hospital areas to provide a segregated pathway (separate areas) for planned surgery |
| Managing complications    | Access to diagnostics and interventions to identify and treat surgical complications                                            | Considered including ring-fenced to indicator description. Overall feeling that would be applied flexibly without a requirement to be ring-fenced.                                                               | 5. Access to diagnostics and interventions to identify and treat surgical complications                          |
| Electricity supply        | Reliable supply of electricity                                                                                                  | Agreed with wording                                                                                                                                                                                              | 6. Reliable supply of electricity                                                                                |
| Oxygen supply             | Reliable supply of supplementary oxygen                                                                                         | Agreed with wording                                                                                                                                                                                              | 7. Reliable supply of supplementary oxygen                                                                       |
| Drug supply               | Reliable supply and management of essential perioperative drugs                                                                 | Agreed with wording                                                                                                                                                                                              | 8. Reliable supply and management of essential perioperative drugs                                               |
| Device supply             | Reliable supply and management of devices and implants                                                                          | Agreed with wording                                                                                                                                                                                              | 9. Reliable supply and management of devices and implants                                                        |
| Sterilisation             | Sufficient surgical instrument and local sterilisation processes                                                                | Discussion as to whether to split out into safe surgical instruments + sterilisation. In overall context of index, decision to move forwards with current wording                                                | 10. Sufficient surgical instrument and local sterilisation processes                                             |
| Protective equipment      | Availability of personal protective equipment for theatre teams (including testing & vaccination)                               | Discussion that testing, vaccination and PPE are too COVID-specific for a generic index so decision to examples in main indicator text.                                                                          | 11. Availability of protective measures for theatre teams                                                        |
| Staff redistribution      | Ability to redistribute staff (within and between hospitals) to maintain capacity                                               | Crossover with "Ability to cover staff absence" so decision to combine. Added planned surgical capacity to ensure consistent and clear across indicators.                                                        | 12. Ability to redistribute staff (within and between hospitals) to maintain planned surgical capacity           |
| Ring-fenced teams         | Ring-fenced (reserved) teams to provide elective surgical care                                                                  | Identified need to explain definition of ring-fenced in subtext. Felt important to keep reserved as globally relevant terminology. Considered large crossover with staff absence                                 | 13. Ring-fenced (reserved) teams to provide planned surgical care                                                |
| Staff absence             | Ability to cover staff absence                                                                                                  | Combined with "Ability to redistribute staff (within and between hospitals) to maintain capacity"                                                                                                                | -                                                                                                                |
| Patient prioritisation    | Cross-specialty surgical patient prioritisation system                                                                          | Agreed with wording                                                                                                                                                                                              | 14. Cross-specialty patient prioritisation for surgery                                                           |
| Procedure prioritisation  | Ability to identify and cancel procedures of limited clinical value                                                             | Agreed to improve description with 'non-essential surgery'                                                                                                                                                       | 15. Ability to identify and cancel procedures of limited clinical value (non-essential surgery)                  |
| Formal plan               | Formal plan to continue elective surgery during periods of increased pressure                                                   | Add 'operational' to plan to ensure this is actionable. Add 'external system stress' to definition to describe high pressure periods                                                                             | 16. Formal operational plan to continue planned surgery during periods of external system stress                 |
| Preoperative assessment   | Ability to conduct preoperative testing (e.g. blood tests, ECG) away from an acute site hospital                                | In the community added to improve interpretability                                                                                                                                                               | 17. Ability to conduct preoperative assessment in the community                                                  |
| Preoperative testing      | Access to routine preoperative testing for endemic/epidemic diseases (e.g. malaria, COVID-19, influenza)                        | Discussion to drop examples in generic index and improve description in supporting materials                                                                                                                     | 18. Access to preoperative testing for endemic and epidemic diseases                                             |
| Hospital transfer         | Access to a hospital network to transfer care of patients requiring elective surgery to a linked hospital with greater capacity | Simplified language                                                                                                                                                                                              | 19. Ability to transfer patients to another hospital with greater capacity                                       |
| Timely discharge          | Access to procedures and technologies to facilitate timely discharges                                                           | Simplified language to improve relevance across settings. Group agreed that flow through the hospital an essential component of prepared health systems.                                                         | 20. Ability to facilitate timely discharges                                                                      |
| Social support            | Social support system to facilitate safe discharge                                                                              | Group agreed that social support systems, whilst not universally available, improve surgical system preparedness. Discussed crossover with 'timely discharge' but group considered them to be separate entities. | 21. Social support system to facilitate safe discharge                                                           |
| Remote outpatients        | Capacity to use telephone or video calls for outpatients appointments                                                           | Agreed with wording.                                                                                                                                                                                             | 22. Capacity to use telephone or video calls for outpatient appointments                                         |
| Family communication      | Capacity to communicate with family members during periods of restricted hospital visiting                                      | Group felt important to include & universal. Suggested wording capability rather than capacity (i.e. infrastructure rather than human resource issues)                                                           | 23. Capacity and capability to communicate with family members                                                   |

**Supplementary table 4. Features of hospitals included in Surgical Preparedness Index (SPI) measurement**

| Factor                                    | Levels                   | World Bank income group |                 |             | Total       |
|-------------------------------------------|--------------------------|-------------------------|-----------------|-------------|-------------|
|                                           |                          | High<br>N=887           | Middle<br>N=675 | Low<br>N=70 |             |
| <b>Hospital features</b>                  |                          |                         |                 |             |             |
| Funding                                   | Public (government)      | 718 (80.9)              | 445 (65.9)      | 54 (77.1)   | 1217 (74.6) |
|                                           | Private                  | 51 (5.7)                | 138 (20.4)      | 7 (10.0)    | 196 (12.0)  |
|                                           | Mixed public and private | 118 (13.3)              | 92 (13.6)       | 9 (12.9)    | 219 (13.4)  |
| Urgency                                   | Planned only             | 28 (3.2)                | 32 (4.7)        | 2 (2.9)     | 62 (3.8)    |
|                                           | Planned and unplanned    | 859 (96.8)              | 643 (95.3)      | 68 (97.1)   | 1570 (96.2) |
| Setting                                   | Urban                    | 376 (42.4)              | 241 (35.7)      | 17 (24.3)   | 634 (38.8)  |
|                                           | Rural                    | 22 (2.5)                | 22 (3.3)        | 10 (14.3)   | 54 (3.3)    |
|                                           | Mixed urban and rural    | 489 (55.1)              | 412 (61.0)      | 43 (61.4)   | 944 (57.8)  |
| Hospital Beds                             | Less than 50             | 21 (2.4)                | 50 (7.4)        | 11 (15.7)   | 82 (5.0)    |
|                                           | 50-99                    | 38 (4.3)                | 58 (8.6)        | 8 (11.4)    | 104 (6.4)   |
|                                           | 100-199                  | 73 (8.2)                | 105 (15.6)      | 11 (15.7)   | 189 (11.6)  |
|                                           | 200-499                  | 286 (32.2)              | 197 (29.2)      | 21 (30.0)   | 504 (30.9)  |
|                                           | 500-999                  | 314 (35.4)              | 146 (21.6)      | 16 (22.9)   | 476 (29.2)  |
|                                           | 1000+                    | 155 (17.5)              | 119 (17.6)      | 3 (4.3)     | 277 (17.0)  |
| <b>Country features</b>                   |                          |                         |                 |             |             |
| Oxford COVID-19 government response index | Mean (s.d.)              | 63.1 (8.2)              | 59.4 (11.0)     | 40.3 (16.0) | 60.6 (10.9) |
| COVID-19 burden                           | Moderate                 | 323 (36.4)              | 316 (46.8)      | 56 (80.0)   | 695 (42.6)  |
|                                           | High                     | 563 (63.5)              | 349 (51.7)      | 14 (20.0)   | 926 (56.7)  |
|                                           | Missing                  | 1                       | 10              | 0           | 11          |

<sup>3</sup>Oxford COVID-19 government response index contains 17 indicators around four themes of closure and containment, health and economic support with a normalised range between 0 (no government response) and 100 (most stringent government response). Each hospital was given a classification based on the country's status at the time of assessment: low COVID-19 burden (index <20), moderate COVID-19 burden (20-60), and high COVID-19 burden (>60).

**Supplementary table 5. Surgery Preparedness Index scores by country**

| Country*                         | Assessments<br>(N=4714) | Hospitals<br>(N=1632) | Min | Max | Mean  | s.d. |
|----------------------------------|-------------------------|-----------------------|-----|-----|-------|------|
| Afghanistan                      | 4                       | 1                     | 46  | 100 | 77.0  | 22.5 |
| Albania                          | 4                       | 3                     | 80  | 92  | 88.0  | 5.7  |
| Algeria                          | 9                       | 7                     | 48  | 72  | 61.7  | 8.6  |
| Argentina                        | 49                      | 15                    | 57  | 115 | 93.7  | 13.0 |
| Aruba                            | 1                       | 1                     | 80  | 80  | 80.0  | NA   |
| Australia                        | 96                      | 47                    | 64  | 114 | 90.7  | 10.7 |
| Austria                          | 44                      | 15                    | 76  | 109 | 94.4  | 9.2  |
| Azerbaijan                       | 4                       | 3                     | 68  | 81  | 75.0  | 5.5  |
| Bahamas (the)                    | 1                       | 1                     | 66  | 66  | 66.0  | NA   |
| Bahrain                          | 8                       | 4                     | 66  | 114 | 92.6  | 14.9 |
| Bangladesh                       | 13                      | 5                     | 67  | 103 | 87.2  | 12.5 |
| Barbados                         | 8                       | 1                     | 49  | 74  | 64.3  | 7.8  |
| Belarus                          | 2                       | 2                     | 58  | 83  | 70.5  | 17.7 |
| Belgium                          | 14                      | 9                     | 69  | 109 | 91.4  | 10.6 |
| Benin                            | 3                       | 2                     | 76  | 76  | 76.0  | 0.0  |
| Bolivia (Plurinational State of) | 1                       | 1                     | 111 | 111 | 111.0 | NA   |
| Bosnia and Herzegovina           | 12                      | 2                     | 71  | 102 | 86.4  | 8.3  |
| Botswana                         | 3                       | 1                     | 72  | 81  | 77.3  | 4.7  |
| Brazil                           | 82                      | 38                    | 48  | 115 | 85.7  | 15.7 |
| Bulgaria                         | 17                      | 8                     | 63  | 110 | 88.5  | 15.4 |
| Cambodia                         | 1                       | 1                     | 63  | 63  | 63.0  | NA   |
| Cameroon                         | 3                       | 1                     | 68  | 93  | 81.0  | 12.5 |
| Canada                           | 52                      | 22                    | 60  | 115 | 90.2  | 13.5 |
| Chile                            | 13                      | 6                     | 63  | 102 | 87.5  | 9.9  |
| China                            | 4                       | 3                     | 80  | 93  | 86.8  | 6.7  |
| Colombia                         | 44                      | 14                    | 63  | 109 | 87.2  | 12.7 |
| Croatia                          | 18                      | 9                     | 69  | 112 | 87.3  | 14.4 |
| Cyprus                           | 4                       | 3                     | 60  | 69  | 64.5  | 4.2  |
| Czechia                          | 3                       | 3                     | 80  | 96  | 90.7  | 9.2  |
| Denmark                          | 3                       | 3                     | 102 | 106 | 103.7 | 2.1  |
| Dominican Republic (the)         | 5                       | 3                     | 100 | 114 | 108.4 | 5.8  |
| Ecuador                          | 8                       | 5                     | 82  | 110 | 92.5  | 8.8  |
| Egypt                            | 187                     | 56                    | 46  | 115 | 81.2  | 13.1 |
| Estonia                          | 1                       | 1                     | 91  | 91  | 91.0  | NA   |
| Ethiopia                         | 37                      | 16                    | 43  | 102 | 63.2  | 14.7 |
| Finland                          | 5                       | 4                     | 81  | 90  | 84.8  | 4.4  |
| France                           | 65                      | 35                    | 50  | 114 | 85.9  | 14.6 |
| Georgia                          | 1                       | 1                     | 68  | 68  | 68.0  | NA   |
| Germany                          | 99                      | 37                    | 69  | 115 | 94.1  | 9.9  |
| Ghana                            | 59                      | 8                     | 34  | 103 | 72.9  | 15.8 |
| Greece                           | 170                     | 42                    | 48  | 115 | 80.8  | 15.2 |
| Guatemala                        | 12                      | 7                     | 47  | 106 | 75.2  | 20.9 |
| Hong Kong SAR                    | 6                       | 1                     | 67  | 105 | 92.3  | 13.1 |
| Hungary                          | 3                       | 2                     | 76  | 95  | 83.0  | 10.4 |
| India                            | 279                     | 81                    | 51  | 115 | 92.4  | 12.9 |
| Indonesia                        | 24                      | 11                    | 68  | 106 | 81.1  | 10.9 |
| Iran (Islamic Republic of)       | 36                      | 18                    | 52  | 106 | 75.3  | 12.6 |
| Iraq                             | 22                      | 13                    | 56  | 87  | 72.8  | 8.9  |
| Ireland                          | 36                      | 12                    | 62  | 108 | 86.2  | 10.4 |
| Israel                           | 9                       | 3                     | 88  | 113 | 100.3 | 7.6  |
| Italy                            | 492                     | 129                   | 48  | 115 | 84.7  | 14.0 |
| Japan                            | 26                      | 19                    | 59  | 110 | 83.5  | 14.1 |
| Jordan                           | 80                      | 18                    | 49  | 115 | 86.3  | 13.9 |
| Kazakhstan                       | 12                      | 6                     | 66  | 98  | 82.8  | 11.1 |
| Kenya                            | 8                       | 6                     | 61  | 102 | 88.8  | 14.2 |
| Kuwait                           | 2                       | 2                     | 73  | 90  | 81.5  | 12.0 |
| Latvia                           | 5                       | 3                     | 73  | 106 | 88.0  | 12.3 |
| Lebanon                          | 14                      | 9                     | 63  | 98  | 81.1  | 11.0 |
| Libya                            | 126                     | 28                    | 28  | 94  | 61.7  | 13.2 |
| Lithuania                        | 10                      | 6                     | 82  | 113 | 95.0  | 12.7 |
| Madagascar                       | 2                       | 1                     | 64  | 104 | 84.0  | 28.3 |
| Malawi                           | 1                       | 1                     | 80  | 80  | 80.0  | NA   |
| Malaysia                         | 57                      | 23                    | 60  | 106 | 84.1  | 11.2 |
| Malta                            | 3                       | 1                     | 79  | 90  | 85.7  | 5.9  |
| Mexico                           | 62                      | 24                    | 46  | 115 | 80.7  | 16.1 |
| Moldova (the Republic of)        | 4                       | 2                     | 57  | 96  | 68.5  | 18.4 |
| Mongolia                         | 4                       | 1                     | 43  | 85  | 57.8  | 19.0 |
| Morocco                          | 20                      | 7                     | 55  | 100 | 79.7  | 13.4 |
| Nepal                            | 3                       | 3                     | 80  | 90  | 85.7  | 5.1  |
| Netherlands (the)                | 18                      | 10                    | 74  | 114 | 98.3  | 12.1 |
| New Zealand                      | 16                      | 11                    | 66  | 97  | 79.4  | 10.4 |
| Nicaragua                        | 1                       | 1                     | 99  | 99  | 99.0  | NA   |
| Niger (the)                      | 1                       | 1                     | 65  | 65  | 65.0  | NA   |
| Nigeria                          | 212                     | 31                    | 39  | 113 | 74.5  | 15.1 |
| Norway                           | 2                       | 1                     | 79  | 105 | 92.0  | 18.4 |
| Oman                             | 9                       | 2                     | 71  | 99  | 87.9  | 8.2  |



|                                                            |     |     |    |     |       |      |
|------------------------------------------------------------|-----|-----|----|-----|-------|------|
| Pakistan                                                   | 118 | 43  | 38 | 115 | 81.7  | 16.4 |
| Palestine, State of                                        | 58  | 15  | 46 | 114 | 74.9  | 11.9 |
| Panama                                                     | 5   | 3   | 65 | 112 | 93.2  | 17.5 |
| Paraguay                                                   | 14  | 6   | 51 | 97  | 67.8  | 15.7 |
| Peru                                                       | 16  | 10  | 49 | 94  | 68.1  | 14.0 |
| Philippines (the)                                          | 17  | 8   | 65 | 105 | 88.9  | 11.0 |
| Poland                                                     | 9   | 5   | 72 | 99  | 85.7  | 9.7  |
| Portugal                                                   | 30  | 14  | 59 | 105 | 85.4  | 11.0 |
| Qatar                                                      | 11  | 2   | 86 | 114 | 99.8  | 11.2 |
| Republic of North Macedonia                                | 32  | 10  | 61 | 114 | 84.8  | 14.2 |
| Romania                                                    | 44  | 16  | 52 | 114 | 89.2  | 14.8 |
| Russian Federation (the)                                   | 28  | 17  | 55 | 97  | 79.0  | 11.3 |
| Rwanda                                                     | 11  | 6   | 66 | 113 | 84.5  | 14.1 |
| Saint Kitts and Nevis                                      | 1   | 1   | 54 | 54  | 54.0  | NA   |
| Saudi Arabia                                               | 94  | 23  | 58 | 115 | 89.5  | 14.7 |
| Senegal                                                    | 3   | 2   | 68 | 68  | 68.0  | 0.0  |
| Serbia                                                     | 54  | 16  | 51 | 112 | 87.3  | 15.0 |
| Singapore                                                  | 15  | 6   | 87 | 114 | 104.7 | 6.8  |
| Slovakia                                                   | 5   | 2   | 66 | 100 | 77.8  | 12.9 |
| Slovenia                                                   | 11  | 2   | 80 | 111 | 94.5  | 9.4  |
| Somalia                                                    | 5   | 1   | 45 | 74  | 62.6  | 11.2 |
| South Africa                                               | 11  | 6   | 70 | 99  | 81.0  | 10.2 |
| Spain                                                      | 258 | 82  | 59 | 115 | 89.2  | 11.1 |
| Sri Lanka                                                  | 14  | 7   | 65 | 109 | 81.5  | 11.5 |
| Sudan (the)                                                | 58  | 21  | 39 | 95  | 65.0  | 14.8 |
| Sweden                                                     | 15  | 9   | 83 | 112 | 91.8  | 7.6  |
| Switzerland                                                | 38  | 9   | 69 | 115 | 95.5  | 9.7  |
| Syrian Arab Republic                                       | 63  | 9   | 28 | 99  | 69.5  | 11.1 |
| Taiwan (Province of China)                                 | 4   | 2   | 84 | 101 | 92.3  | 7.1  |
| Thailand                                                   | 6   | 3   | 97 | 115 | 106.8 | 8.2  |
| Trinidad and Tobago                                        | 2   | 2   | 42 | 86  | 64.0  | 31.1 |
| Tunisia                                                    | 9   | 6   | 61 | 92  | 78.8  | 10.1 |
| Turkey                                                     | 139 | 48  | 67 | 115 | 92.6  | 11.3 |
| Uganda                                                     | 12  | 8   | 31 | 88  | 64.0  | 16.6 |
| Ukraine                                                    | 3   | 2   | 69 | 97  | 82.0  | 14.1 |
| United Arab Emirates (the)                                 | 16  | 6   | 88 | 115 | 101.3 | 6.7  |
| United Kingdom of Great Britain and Northern Ireland (the) | 510 | 177 | 26 | 115 | 88.7  | 11.4 |
| United States of America (the)                             | 135 | 78  | 62 | 115 | 98.9  | 10.4 |
| Uruguay                                                    | 9   | 3   | 79 | 96  | 89.8  | 5.8  |
| Venezuela (Bolivarian Republic of)                         | 1   | 1   | 35 | 35  | 35.0  | NA   |
| Yemen                                                      | 37  | 5   | 43 | 86  | 62.6  | 12.5 |
| Zambia                                                     | 3   | 2   | 54 | 69  | 61.3  | 7.5  |
| Zimbabwe                                                   | 16  | 5   | 38 | 79  | 56.9  | 11.2 |

\*The GlobalSurg and CovidSurg networks take an apolitical stance on naming countries and territories here that are non-sovereign or self-declared. In an attempt to create a degree of standardisation we adopted the United Nations' official list of countries and territories, limited to investigators by a prespecified list. Please note that we are not attempting to justify sovereign vs non-sovereign states but simply wish to advance knowledge across countries and regions as self-identified by participants.

**Supplementary table 6. Features of hospital assessors**

| Factor                       | Level                                 | World Bank income group |                  |              | Total       |
|------------------------------|---------------------------------------|-------------------------|------------------|--------------|-------------|
|                              |                                       | High<br>N=2454          | Middle<br>N=2029 | Low<br>N=231 |             |
| Gender                       | Male                                  | 1779 (72.5)             | 1487 (73.3)      | 174 (75.3)   | 3440 (73.0) |
|                              | Female                                | 670 (27.3)              | 539 (26.6)       | 57 (24.7)    | 1266 (26.9) |
|                              | Non-binary                            | 5 (0.2)                 | 0 (0.0)          | 0 (0.0)      | 5 (0.1)     |
|                              | (Missing)                             | 0 (0.0)                 | 3 (0.1)          | 0 (0.0)      | 3 (0.1)     |
| Primary<br>specialty<br>area | Acute care surgery                    | 138 (5.6)               | 69 (3.4)         | 8 (3.5)      | 215 (4.6)   |
|                              | Breast surgery                        | 65 (2.6)                | 53 (2.6)         | 1 (0.4)      | 119 (2.5)   |
|                              | Cardiac surgery                       | 64 (2.6)                | 56 (2.8)         | 5 (2.2)      | 125 (2.7)   |
|                              | Colorectal surgery                    | 369 (15.0)              | 149 (7.3)        | 8 (3.5)      | 526 (11.2)  |
|                              | Endocrine surgery                     | 34 (1.4)                | 41 (2.0)         | 1 (0.4)      | 76 (1.6)    |
|                              | Non-specialised general surgery       | 406 (16.5)              | 559 (27.6)       | 112 (48.5)   | 1077 (22.8) |
|                              | Gynaecology                           | 107 (4.4)               | 92 (4.5)         | 7 (3.0)      | 206 (4.4)   |
|                              | Hepatobiliary surgery                 | 105 (4.3)               | 64 (3.2)         | 3 (1.3)      | 172 (3.6)   |
|                              | Hernia surgery                        | 9 (0.4)                 | 27 (1.3)         | 3 (1.3)      | 39 (0.8)    |
|                              | Neurosurgery                          | 105 (4.3)               | 90 (4.4)         | 20 (8.7)     | 215 (4.6)   |
|                              | Obstetrics                            | 21 (0.9)                | 65 (3.2)         | 8 (3.5)      | 94 (2.0)    |
|                              | Oesophagogastric surgery              | 94 (3.8)                | 23 (1.1)         | 0 (0.0)      | 117 (2.5)   |
|                              | Ophthalmology                         | 35 (1.4)                | 40 (2.0)         | 9 (3.9)      | 84 (1.8)    |
|                              | Oral and maxillofacial surgery        | 61 (2.5)                | 32 (1.6)         | 0 (0.0)      | 93 (2.0)    |
|                              | Elective orthopaedics                 | 81 (3.3)                | 33 (1.6)         | 0 (0.0)      | 114 (2.4)   |
|                              | Orthopaedic trauma surgery            | 181 (7.4)               | 103 (5.1)        | 16 (6.9)     | 300 (6.4)   |
|                              | Otolaryngology                        | 111 (4.5)               | 82 (4.0)         | 5 (2.2)      | 198 (4.2)   |
|                              | Paediatric surgery                    | 93 (3.8)                | 123 (6.1)        | 3 (1.3)      | 219 (4.6)   |
|                              | Plastic surgery                       | 52 (2.1)                | 48 (2.4)         | 6 (2.6)      | 106 (2.2)   |
|                              | Surgical oncology                     | 84 (3.4)                | 118 (5.8)        | 3 (1.3)      | 205 (4.3)   |
| Thoracic surgery             | 62 (2.5)                              | 34 (1.7)                | 1 (0.4)          | 97 (2.1)     |             |
| Transplant surgery           | 28 (1.1)                              | 17 (0.8)                | 0 (0.0)          | 45 (1.0)     |             |
| Urology                      | 74 (3.0)                              | 73 (3.6)                | 7 (3.0)          | 154 (3.3)    |             |
| Vascular surgery             | 74 (3.0)                              | 32 (1.6)                | 2 (0.9)          | 108 (2.3)    |             |
| Missing                      | 1 (0.0)                               | 6 (0.3)                 | 3 (1.3)          | 10 (0.2)     |             |
| Assessor                     | Surgeon                               | 1550 (63.2)             | 1212 (59.7)      | 83 (35.9)    | 2845 (60.4) |
|                              | Surgical trainee                      | 682 (27.8)              | 492 (24.2)       | 100 (43.3)   | 1274 (27.0) |
|                              | Anaesthetist/critical care consultant | 133 (5.4)               | 123 (6.1)        | 8 (3.5)      | 264 (5.6)   |
|                              | Anaesthetist/critical care trainee    | 13 (0.5)                | 45 (2.2)         | 5 (2.2)      | 63 (1.3)    |
|                              | Nurse                                 | 11 (0.4)                | 30 (1.5)         | 7 (3.0)      | 48 (1.0)    |
|                              | Hospital manager                      | 54 (2.2)                | 96 (4.7)         | 19 (8.2)     | 169 (3.6)   |
|                              | Non-clinical researcher               | 32 (1.3)                | 58 (2.9)         | 14 (6.1)     | 104 (2.2)   |
|                              | Other                                 | 137 (5.6)               | 226 (11.1)       | 54 (23.4)    | 417 (8.8)   |

**Supplementary table 7. Hospital and health system factors associated with planned Surgical Volume Ratio (SVR) during COVID-19**

| Factor                                                 | Levels                   | Estimate  | 95% confidence interval |       | P-value |
|--------------------------------------------------------|--------------------------|-----------|-------------------------|-------|---------|
|                                                        |                          |           | Lower                   | Upper |         |
| Intercept                                              | -                        | 87.44     | 78.83                   | 96.04 | <0.0001 |
| Surgical Preparedness Index*                           | Point score              | 0.35      | 0.30                    | 0.41  | <0.0001 |
| Oxford COVID-19 government response index <sup>§</sup> | Point score              | -0.56     | -0.64                   | -0.48 | <0.0001 |
| Country income                                         | High income              | Reference | -                       | -     | -       |
|                                                        | Middle income            | -8.37     | -8.45                   | -8.29 | <0.0001 |
|                                                        | Low income               | -10.56    | -14.89                  | -6.22 | <0.0001 |
| Hospital funding                                       | Public                   | Reference | -                       | -     | -       |
|                                                        | Private                  | 6.17      | 3.29                    | 9.05  | <0.0001 |
|                                                        | Mixed public and private | 3.96      | 1.82                    | 6.10  | 0.0002  |
| Surgical service provision                             | Planned only             | Reference | -                       | -     | -       |
|                                                        | Planned and unplanned    | -4.56     | -8.81                   | -0.31 | 0.035   |
| Hospital location                                      | Urban                    | Reference | -                       | -     | -       |
|                                                        | Rural                    | 2.23      | -3.09                   | 7.56  | 0.411   |
|                                                        | Mixed urban and rural    | -0.01     | -1.56                   | 1.54  | 0.989   |
| Number of beds                                         | <50                      | Reference | -                       | -     | -       |
|                                                        | 50-99                    | 2.23      | -2.66                   | 7.11  | 0.372   |
|                                                        | 100-199                  | 3.04      | -1.47                   | 7.55  | 0.187   |
|                                                        | 200-499                  | 3.05      | -0.97                   | 7.08  | 0.137   |
|                                                        | 500-999                  | 3.41      | -0.62                   | 7.44  | 0.097   |
|                                                        | ≥1000                    | 4.24      | 0.07                    | 8.42  | 0.046   |

Estimate of the intercept value, and beta-coefficients for each factor / levels in the mixed effects linear regression model. \*Surgical preparedness index (SPI) score is made up of 23 indicators, each scored between 1 (very weak) and 5 (very strong). The sum score values range between 23 and 115. <sup>§</sup>Oxford COVID-19 government response index contains 17 indicators around four themes of closure and containment, health, and economic support with a normalised range between 0 (no government response) and 100 (most stringent government response). A directed acyclic graph displaying proposed causal relationships is presented in Figure 6.

**Supplementary figure 1. Distribution of Surgical Preparedness Index (SPI) scores across key subgroups**

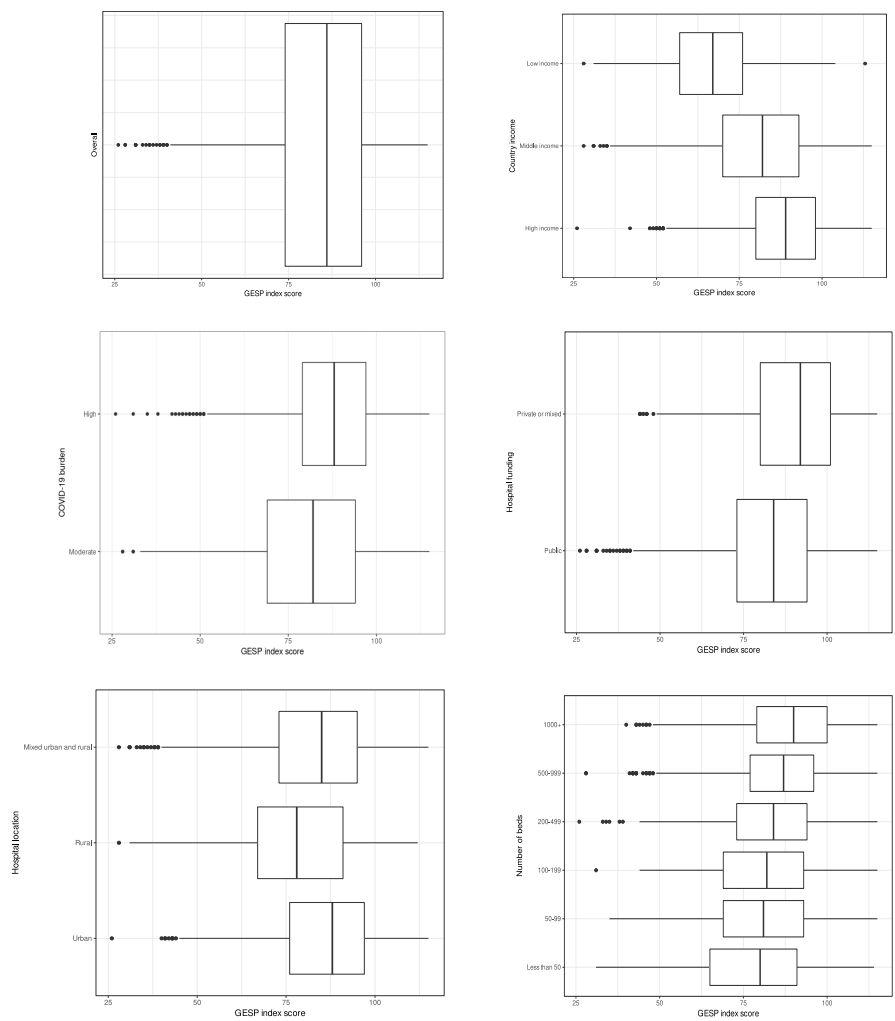

Outlines were defined as standard for box plots with the lower outliers representing  $< Q1 - 1.5 \cdot IQR$  and the upper outlier  $> Q3 + 1.5 \cdot IQR$ .

**Supplementary figure 2. Relationship between Surgical Preparedness Index (SPI) and other global health indicators**

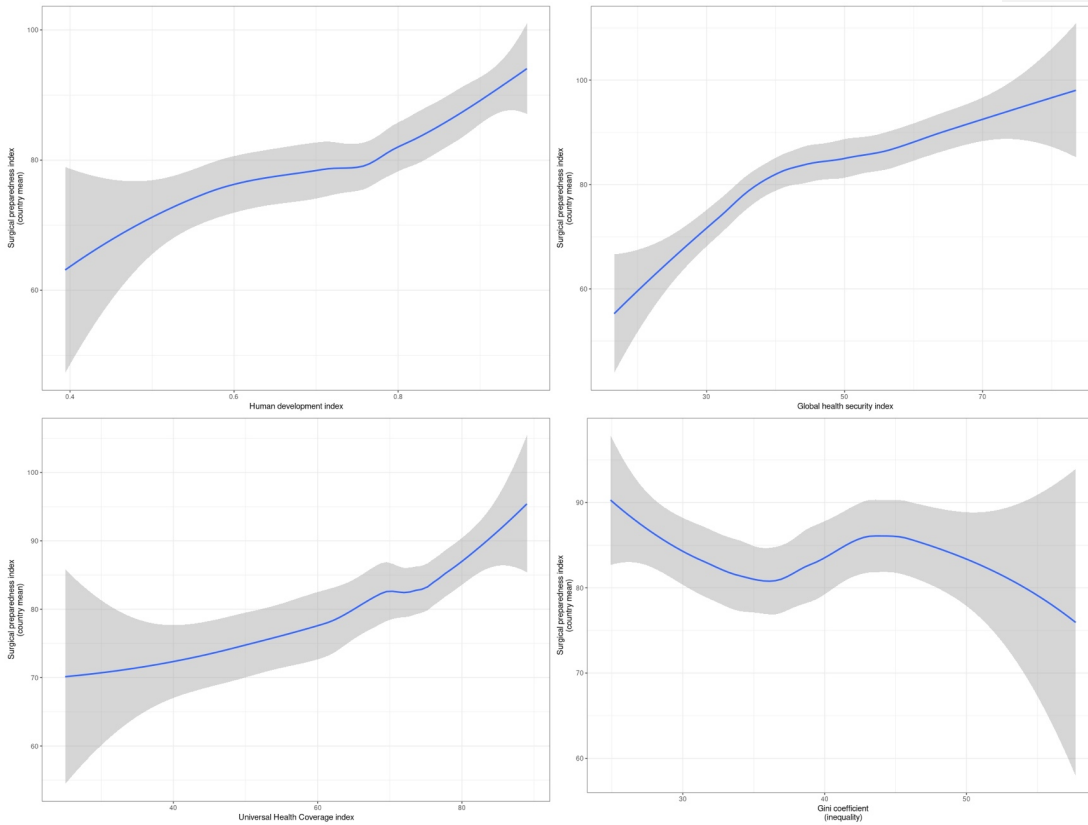

We present the relationship between national mean SPI scores and four relevant global health indicators: (1) United Nation's Human development index, which is a composite index of life expectancy, education and per capita income. A higher HDI score indicates greater development; (2) Global health security index which is an assessment of global health security capabilities (i.e., a measure of whole health-system resilience) from the Johns Hopkins Center for Health Security, the Nuclear Threat Initiative (NTI) and the Economist Intelligence Unit (EIU). A high GHS score indicates a more resilient health system; (3) World Health Organization Universal Health Coverage (UHC) service coverage index, which combines 14 tracer indicators of service coverage into a single summary measure. A higher UHC index indicates greater coverage; (4) Gini coefficient which is a measure of population wealth inequality. A Gini coefficient of 0 expresses perfect equality whilst 1 indicates maximal inequality.

Supplementary figure 3. Suggested implementation framework for hospital-level surgical and anaesthesia service strengthening

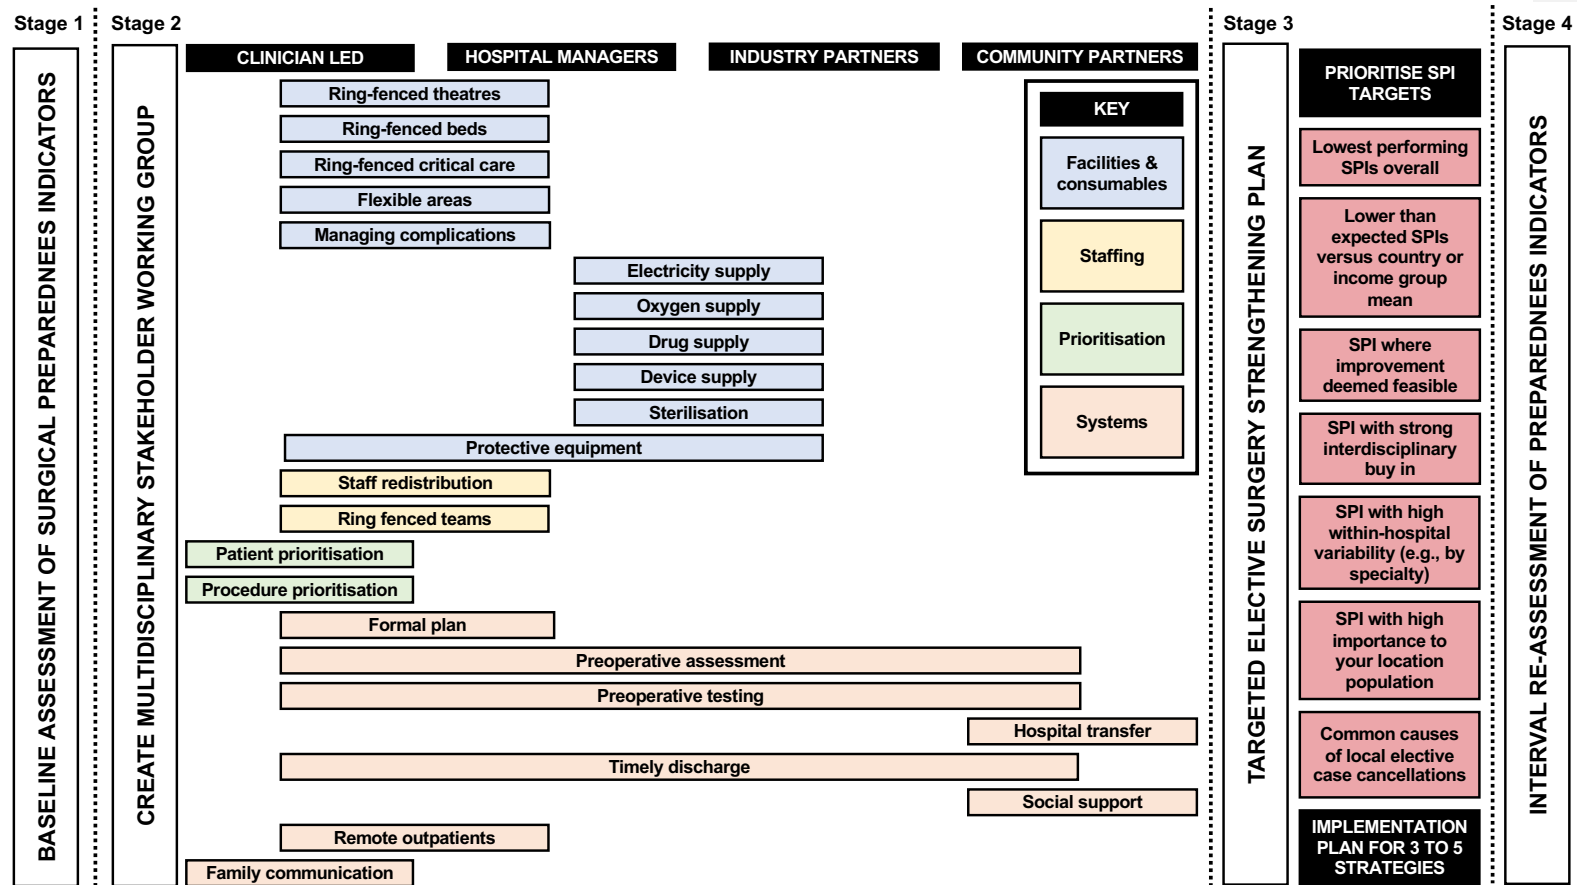

**Supplementary figure 4. Surgical volume ratio overall and by country income group**

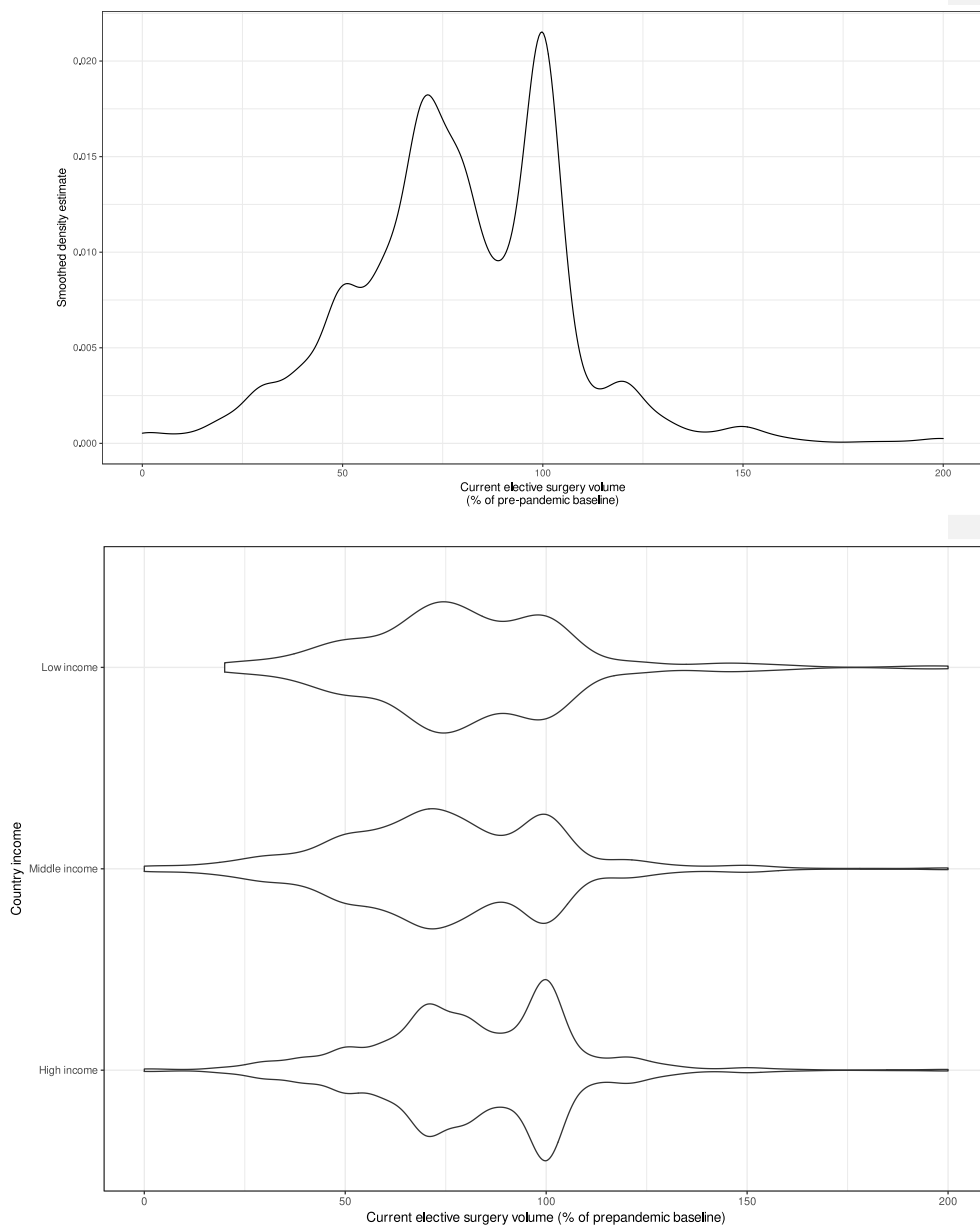

**Supplementary figure 5. Variability in ability of hospitals to maintain their planned Surgery Volume Ratio (SVR) during the SARS-CoV-2 pandemic**

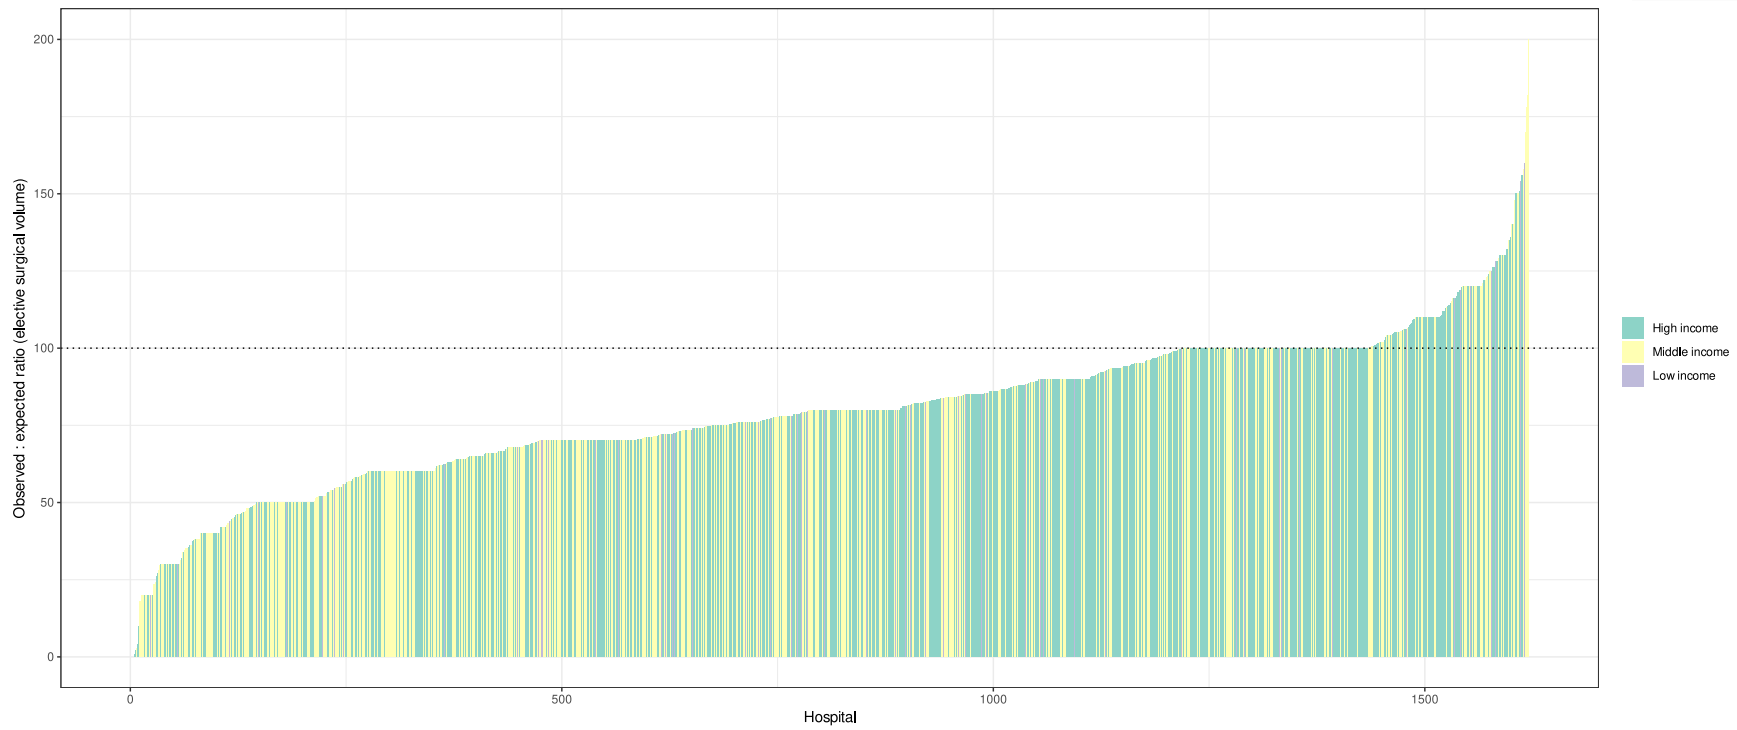

Each vertical bar represents a participating hospital. Dotted line demonstrates where the observed planned case volume was as expected based on the same 1-month assessment period in 2019 (SVR = 100%). Hospitals from low, middle and high-income countries demonstrated low, moderate and high ability to maintain their planned SVR, indicating that preparedness was not a function of health system resourcing / country income alone.



Supplementary figure 6. Directed Acyclic Graph (DAG) displaying causal model linking the Surgical Preparedness Index to planned surgical volume

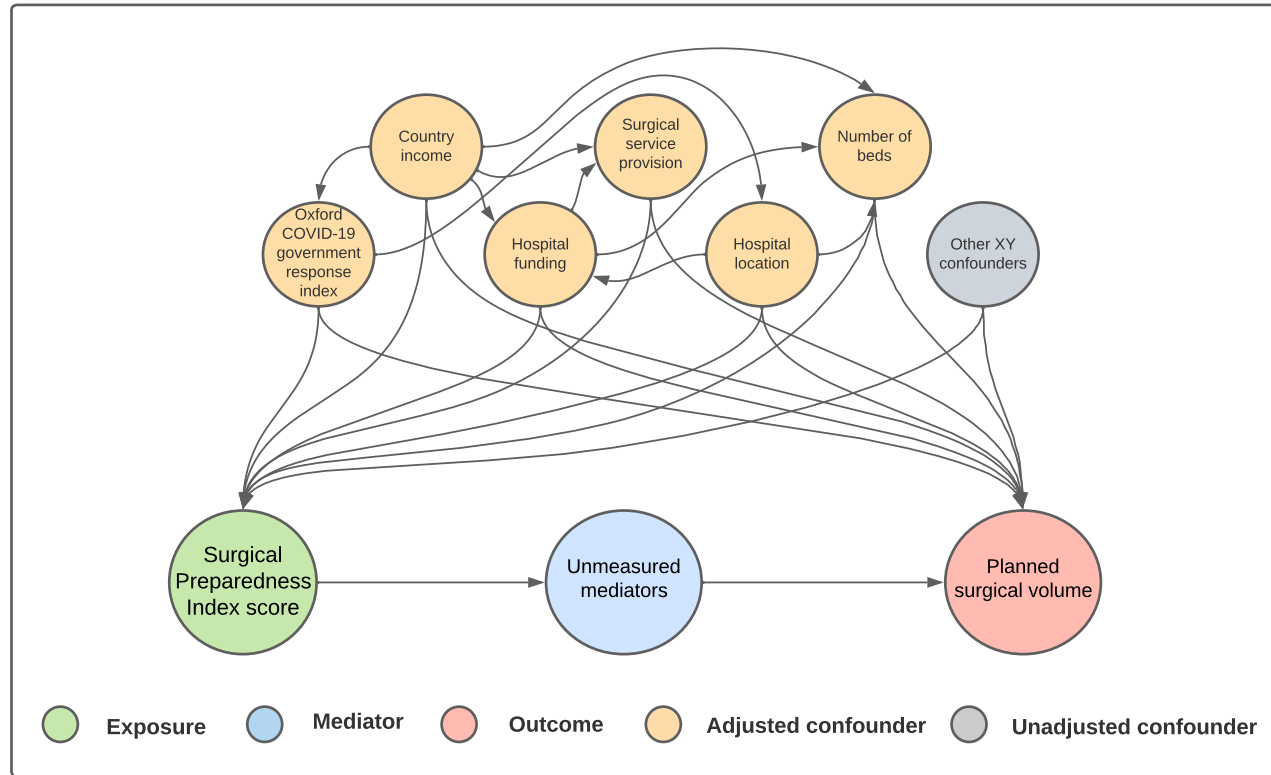

Arrows indicate the direction of hypothesised casual relationships adopting in the mixed-effects linear regression modelling.

## **Appendix A. Collaborating authors**

### *International indicator development and writing group*

James C Glasbey (UK), Tom EF Abbott (UK), Adesoji Ademuyiwa (Nigeria), Adewale Adisa (Nigeria), Ehab AlAmeer (Saudi Arabia), Sattar Alshryda (UK), Alexis P Arnaud (France), Brittany Bankhead-Kendall (United States), Abou Chaar MK (Jordan), Daoud Chaudhry (UK), Ainhoa Costas-Chavarri (Rwanda), Miguel F Cunha (Portugal), Justine I Davies (UK), Anant Desai (UK), Muhammed Elhadi (Libya), Marco Fiore (Italy), J. Edward Fitzgerald (UK), Maria Fourtounas (South Africa), Alex James Fowler (UK), Kay Futaba (Hong Kong), Gaetano Gallo (Italy), Dhruva Ghosh (India), Rohan R Gujjuri (UK), Rebecca Hamilton (USA), Parvez Haque (India), Ewen M Harrison (UK), Peter Hutchinson (UK), Gabriella Hyman (South Africa), Arda Isik (Turkey), Umesh Jayarajah (Sri Lanka), Haytham MA Kaafarani (United States), Bryar Kadir (UK), Ismail Lawani (Benin), Hans Lederhuber (Germany), Elizabeth Li (UK), Markus W Löffler (Germany), Maria Aguilera Lorena (Guatemala), Harvinder Mann (UK), Janet Martin (Canada), Dennis Mazingi (Zimbabwe), Craig D McClain (United States), Kenneth A McLean (UK), John G Meara (USA), Antonio Ramos-De La Medina (Mexico), Mengistu Mengesha (Ethiopia), Ana Minaya (Spain), Maria Marta Modolo (Argentina), Rachel Moore (South Africa), Dion Morton (UK), Dmitri Nepogodiev (UK), Faustin Ntirenganya (Rwanda), Francesco Pata (Italy), Rupert Pearse (UK), Maria Picciochi (Portugal), Thomas Pinkney (UK), Peter Pockney (Australia), Gabrielle H van Ramshorst (Belgium), Toby Richards (Australia), April Camilla Roslani (Malaysia), Sohei Satoi (Japan), Raza Sayyed (Pakistan), Richard Shaw (UK), Joana Filipa Ferreira Simões (UK), Neil Smart (UK), Richard Sullivan (UK), Malin Sund (Sweden), Sudha Sundar (UK), Stephen Tabiri (Ghana), Elliott H Taylor (UK), Mary L Venn (UK), Dakshitha Wickramasinghe (Sri Lanka), Naomi Wright (UK), Sebastian Bernardo Shu Yip (Peru), Aneel Bhangu (UK)

### *Statistical analysis and data handling*

James C Glasbey, Kenneth A McLean, Omar Omar, Bryar Kadir, Ewen Harrison, Aneel A Bhangu

### *CovidSurg Operations Committee*

Dmitri Nepogodiev (*Chair*), Kwabena Siaw-Acheampong, Ruth A Benson, Edward Bywater, Daoud Chaudhry, Brett E Dawson, Jonathan P Evans, James C Glasbey, Rohan R Gujjuri, Emily Heritage, Conor S Jones, Sivesh K Kamarajah, Chetan Khatri, Rachel A Khaw, James M Keatley, Andrew Knight, Samuel Lawday, Elizabeth Li, Harvinder S Mann, Ella J Marson, Kenneth A McLean, Siobhan C Mckay, Emily C Mills, Gianluca Pellino, Maria Picciochi,

Elliott H Taylor, Abhinav Tiwari, Joana FF Simoes, Isobel M Trout, Mary L Venn, Richard JW Wilkin, Aneel Bhangu.

*Dissemination Committee*

Joana FF Simoes (*Chair*), Tom EF Abbott, Sadi Abukhalaf, Michel Adamina, Adesoji O Ademuyiwa, Arnav Agarwal, Murat Akkulak, Ehab Alameer, Derek Alderson, Felix Alakaloko, Markus Albertsmeier, Osaid Alser, Muhammad Alshaar, Sattar Alshryda, Alexis P Arnaud, Knut Magne Augestad, Faris Ayasra, José Azevedo, Brittany K Bankhead-Kendall, Emma Barlow, David Beard, Ruth A Benson, Ruth Blanco-Colino, Amanpreet Brar, Ana Minaya-Bravo, Kerry A Breen, Chris Bretherton, Igor Lima Buarque, Joshua Burke, Edward J Caruana, Mohammad Chaar, Sohini Chakrabortee, Peter Christensen, Daniel Cox, Moises Cukier, Miguel F Cunha, Giana H Davidson, Anant Desai, Salomone Di Saverio, Thomas M Drake, John G Edwards, Muhammed Elhadi, Sameh Emile, Shebani Farik, Marco Fiore, J Edward Fitzgerald, Samuel Ford, Tatiana Garmanova, Gaetano Gallo, Dhruva Ghosh, Gustavo Mendonça Ataíde Gomes, Gustavo Grecinos, Ewen A Griffiths, Magdalena Gruendl, Constantine Halkias, Ewen M Harrison, Intisar Hisham, Peter J Hutchinson, Shelley Hwang, Arda Isik, Michael D Jenkinson, Pascal Jonker, Haytham MA Kaafarani, Debby Keller, Angelos Kolias, Schelto Kruijff, Ismail Lawani, Hans Lederhuber, Sezai Leventoglu, Andrey Litvin, Andrew Loehrer, Markus W Löffler, Maria Aguilera Lorena, Maria Marta Modolo, Piotr Major, Janet Martin, Hassan N Mashbari, Dennis Mazingi, Symeon Metallidis, Ana Minaya-Bravo, Helen M Mohan, Rachel Moore, David Moszkowicz, Susan Moug, Joshua S Ng-Kamstra, Mayaba Maimbo, Ionut Negoï, Milagros Niquen, Faustin Ntirenganya, Maricarmen Olivos, Kacimi Oussama, Oumaima Outani, Marie Dione Parreno-Sacalanm, Francesco Pata, Carlos Jose Perez Rivera, Thomas D Pinkney, Willemijn van der Plas, Peter Pockney, Ahmad Qureshi, Dejan Radenkovic, Antonio Ramos-De la Medina, Elliot J Revell, Toby Richards, Keith Roberts, April C Roslani, Martin Rutegård, Juan José Segura-Sampedro, Irène Santos, Sohei Satoi, Raza Sayyed, Andrew Schache, Andreas A Schnitzbauer, Justina O. Seyi-Olajide, Neil Sharma, Catherine A Shaw, Richard Shaw, Sebastian Shu, Kjetil Soreide, Antonino Spinelli, Grant D Stewart, Malin Sund, Sudha Sundar, Stephen Tabiri, Philip Townend, Georgios Tsoulfas, Gabrielle H van Ramshorst, Raghavan Vidya, Dale Vimalachandran, Oliver J Warren, Duane Wedderburn, Naomi Wright, EuroSurg, European Society of Coloproctology (ESCP), Global Initiative for Children's Surgery (GICS), GlobalSurg, GlobalPaedSurg, ItsURG, PTSurg, SpainSurg, Italian Society of Colorectal Surgery (SICCR), Association of Surgeons in Training (ASiT), Irish Surgical Research Collaborative (ISRC), Transatlantic Australasian Retroperitoneal Sarcoma Working Group (TARPSWG), Italian Society of Surgical Oncology (SICO).

*Patient advisory group:* Lesley Booth (UK, patient involvement lead), Margaret Barker (UK), Neil Barker, Shirley Cooke (UK), Suzanne Doré (UK), Nigel Horwood (UK), Emmy Runigamugabo (Rwanda), Carrie Tierney Weir (UK), Mike Bahrami-Hessari (UK, CEI manager)

#### *Collaborators*

*Note: The GlobalSurg and CovidSurg networks take an apolitical stance on naming countries and territories here that are non-sovereign or self-declared. To create a degree of standardisation we adopted the United Nations' official list of countries and territories, limited to investigators by a prespecified list. Please note that we are not attempting to justify sovereign vs non-sovereign states but simply wish to advance knowledge across countries and regions as self-identified by participants.*

**Afghanistan:** Asad Riaz (Aturk National Children's Hospital); Jaffer Shah (Kateb University Medical Research Center).

**Albania:** Mohammed Safi (Regional Hospital of Durres); Dariel Thereska (University Hospital Center Nene Tereza); Irida Dajti (University Hospital Koco Gliozheni).

**Algeria:** Riadh Cheddadi (Annaba University Hospital Center); Anisse Tidjane (EHU-1st November 1954 of Oran); Carlos A Quinteros (El Borma); Ahmed khelfaoui (Hospital of Touggourt); Khalifa M Salem (Public hospital establishment of Sig); Omar Riffi, Salah Eddine O Kacimi, Salim Loudjedi, Tidjani Damerdji (University Hospital Center of Tlemcen).

**Argentina:** Diana A Pantoja Pachajoa, René M Palacios Huatuco, Fernando A Alvarez, Alejandro M Doniquian (Clínica Universitaria Reina Fabiola); Roberto A Abeldaño Zuñiga (Universidad de la Sierra Sur); Francisco Schlottmann (Hospital Alemán of Buenos Aires); Carlos M Cobos (Hospital El Cruce); Cecilia Gigena (Hospital General de Niños Pedro de Elizalde); Agustin Albani Forneris, Agustin Duro, Agustín M García-Mansilla, Virginia Cano Busnelli, Catalina Poggi, Pedro L Mercado, Marcos González, Agustina F Castro Lalin, Horacio F Mayer, Rodrigo Brandariz, Pablo A Slullitel, Rocio Boudou, Pablo A. Lobos, María C Uffelmann, Maria L Petersen, Emilia Luzzi, Fernando L Padilla Lichtenberger, María S Crespi Amor, Celeste S Zarratea, Tomas A Esteves, Nicolas A Gemelli, Sebastián Tirapegui, Juan Liyo, Jordán Scherñuk (Hospital Italiano de Buenos Aires); Luis A Bocalatte (Universidad Abierta Interamericana); Ruben D Balmaceda (Sanatorio Argentino de San Juan); Jose L D'Addino, María M. Caubet (Hospital Prof Dr Bernardo A Houssay); José A Calderón Arancibia (Hospital Público Materno Infantil de Salta); Carina Chwat, Brian

Morris (Hospital Universitario Austral); Nicolas Avellaneda (Hospital Universitario CEMIC); Ivana I Pedraza Salazar (Instituto Oncológico Alexander Fleming); Diego G Eskinazi (Sanatorio 9 de julio SA); Lara Vargas , María E Muriel (Sanatorio Allende - Sede Cerro); Sergio M Lucchini (Sanatorio Allende - Sede Nueva Cordoba

**Aruba:** Martijn P Gosselink (Dr. Horacio E Oduber Hospital)

**Australia:** Amelia L Davis (Armadale Health Service); John C Barker (Armidale Rural Referral Hospital); Kirby R Qin, David M Proud, Daniel RA Cox, Su Kah Goh, David S Liu, Damien M Wu (Austin Hospital); Neil D Merrett, Sarit S Badiani (Bankstown Hospital); Shomik Sengupta, Anshini Jain, Christopher J Steen, Enoch Wong, Christopher CK Ip (Box Hill Hospital); Matthew G Leaning (Caboolture Hospital); Conor B McCartney (Cairns Hospital); Sivakumar Gananadha (Canberra Hospital); Evie FW Yeap (Casey Hospital); Sean G Stevens, Anh N Vu (Colac Area Health); Sarah A Martin (Dandenong Hospital); Guy H M Stanley (Fiona Stanley Hospital); David I Watson (Flinders Medical Centre); Philip J Townend, Thomas K Young, Georgia T Cox (Gold Coast University Hospital); Amanda C Dawson, Sharon, E, Laura, Elizabeth W Y Lun, Ina X Liang (Gosford Hospital); Christine J O'Neill, Natalie J Lott (John Hunter Hospital); Alwin Chuan (Liverpool Hospital); Saravanan SK, Justin Gundara (Logan Hospital); Bee Shan Ong (Lyell McEwin Hospital); Ramesh M Nataraja, Maurizio Pacilli (Monash Children's Hospital); Daniel M Foley, Geraldine J Ooi (Monash Medical Centre); Luke Traeger (Mount Gambier and Districts Health Service); Ewan MacDermid (Nepean Hospital); Jurstine Daruwalla, Russell Hodgson (Northern Hospital); Alexander G Heriot (Peter MacCallum Cancer Centre); Christopher S Mulligan, Nicholas D A Blefari (Port Macquarie Base Hospital); Shaun S Purcell, Adam J Frankel (Princess Alexandra Hospital); Glen R Guerra (QEII jubilee Hospital); Joan S Tefay (Redland Hospital); Rhea W Y Liang (Robina Hospital); Hidde M Kroon, Anthony W Farfus, Leigh R Warren, Jennifer M Roy, Robert J Whitfield, Cea-Cea B Moller, Sean S Davis, Tarik Sammour, Yick Ho Lam, Kevin Kour, Siang Wei Gan, Brendon J Coventry, Joseph A Dawson (Royal Adelaide Hospital); Martin D Batstone (Royal Brisbane and Women's Hospital); Sebastian K King (Royal Children's Hospital); Nathan J Scott (Royal Perth Hospital); Jonathan W Foo, Talia Shepherd (Sir Charles Gairdner Hospital); Richard S Page (St John of God Geelong Hospital); Peter F Choong, Henry E Badgery, Lynn Chong, Lillian Taylor, Michael W Hii, Gavin M Wright (St Vincent's Hospital); Joseph CH Kong (The Alfred Hospital); Matthew M Watson (The Queen Elizabeth Hospital); Jacob Bock, Surjit S Lidder, Patrick Elias, Sathisvaran Kanavathy (The Royal Melbourne Hospital); Cherry E Koh (The Royal Prince Alfred Hospital); Srinivas Kondalsamy Chennakesavan (Toowoomba Hospital); Vishwakar Panuganti, Haider Latif (University Hospital Geelong); Justin MC

Yeung, Alex J Besson, Eunice Q Y Tse, Meron E Pitcher, Danielle L Taylor (Western Health - Footscray hospital and Sunshine hospital); Christopher B Nahm (Westmead Hospital); Alicia Lim (Whyalla Hospital and Health Service); Kevin Tree (Wyong Public Hospital

**Austria:** Felix Aigner (Barmherzige Brüder Krankenhaus, Graz); Christopher Dawoud, Philipp Foessleitner, Matthias Zimmermann, Dominik Wiedemann (General Hospital of Vienna); Oliver Findl (Hanusch Hospital); Franka Messner, Marlies Bauer, Felix Nägele, Irmgard E Kronberger, Dietmar Öfner, Bettina Härter (Innsbruck Medical University); Nina Ru B Bicz, Paul M Zwittag, Nikolaus Poier (Kepler University Hospital, Johannes Kepler University); Francisco Ruiz Navarro (Kepler University Hospital, Johannes Kepler University of Linz (Neuromed Campus)); Yorck A Zebuhr, Paul Köglberger, Clemens G Wiesinger (Klinikum Wels-Grieskirchen GmbH); Erwin Mathew (Krankenhaus der Elisabethinen); Felipe Trivik-Barrientos (Landeskrankenhaus Wiener Neustadt); Ingmar Königsrainer, Gabriel Djedovic (Landeskrankenhaus Feldkirch); Tina U. Cohnert, David B Lumenta, Georg Singer, Andreas Leithner, Lars-Peter Kamolz, Alexandros Andrianakis, Paul Puchwein, Saulius Mikalauskas (Medical University of Graz); Patrick Kirchwegger, Reinhold Függer (Ordensklinikum Linz GmbH Barmherzige Schwestern); Christof Mittermair, Elisabeth Russe, Peter Paal, Martin Grünbart, Michael de Cillia, Helmut G Weiss (Saint John of God Hospital Salzburg); Florian Steiner (Salzkammergut Klinikum Vöcklabruck); Alf Dorian Binder (Universitätsklinikum Tulln).

**Azerbaijan:** Elgun Samadov, Arturan Ibrahimli (Leyla Medical Center); Gurbankhan Muslumov (Scientific Center of Surgery named M.Topchubashov); Nuru Y Bayramov (Surgical Education Hospital of Azerbaijan Medical University

**Bahamas (the):** Jada M Saunders (Princess Margaret Hospital).

**Bahrain:** Noora Almoosa, Huzifa Haj-Ibrahim, Martin Maresch (BDF hospital); Weaam K Ezzdean (Ibn Al Nafees Hospital); Isam M Juma (King Hamad University Hospital); Layla H Hasan, Fayza HA Haider, Ghassan Salman alfaqawi (Salmaniya Medical Complex).

**Bangladesh:** Mohammed S Alam, Shahnoor Islam, AKM K Basher (Dhaka Medical College Hospital); Ashrarur Rahman Mitul, Nazmul Islam (Bangladesh Shishu Hospital & Institute); Antje E. Oosterkamp (Lamb Hospital); Tanveer Ahmed (Sheikh Hasina National Institute of Burn and Plastic Surgery, Dhaka); Md Jafrul Hannan (South Point Hospital, Chattogram).

**Barbados:** Greg M Padmore, Alex F Doyle, Karisha L LaCorbiniere, Rico D R Boyce, Paul T Ragoobar, Keisha M Y Walkes, Amelia A Haynes, Sasha M Corbin (Queen Elizabeth Hospital).

**Belarus:** Yauheniya A. Litvina (Gomel State Medical University, Regional Clinical Hospital); Anvar Makhmudov (Minsk City Clinical Hospital).

**Belgium:** Sébastien Strypstein (AZ Delta); Bert Dhondt, Ricky Rasschaert (AZ Rivierenland); Yasser Farid, El Mahdi Wahib (Brugmann Hospital); Manon Pigeolet (CHU de Charleroi); Koen Van Belle (Europe Hospitals); Stefan De Wachter, Niels Komen (University Hospital Antwerp); Mathieu PJ Vandeputte, Gabrielle H. van Ramshorst (Ghent University Hospital); Yanina J.L. Jansen, Jasper Stijns (UZ Brussel); Jef Van den Eynde (UZ Leuven).

**Benin:** Ismaïl Lawani (Centre Hospitalier Universitaire et Departemental Oueme Plateau); Benedicte I Olowo (Hôpital d'Instruction des Armées de Parakou).

**Bolivia (Plurinational State of):** Israel C. Feraudy (CSBP Clinic).

**Bosnia and Herzegovina:** Vedran Dragisic, Vlatka Martinovic, Tatjana Barišić, Nikolina Penava, (University Clinical Hospital Mostar); Igor Hudic, Samir Delibegovic, Gordana Bogdanović, Gordana Grgić (University Clinical Center Tuzla); Anis Cerovac, Elmedina Cerovac (General Hospital Tešanj).

**Botswana:** Alemayehu G Bedada (Department of Surgery), Mamo Woldu Kassa (Department of Anaesthesia & Critical Care, Faculty of Medicine, University of Botswana, Princess Marina Hospital).

**Brazil:** Glauco Baiocchi (AC Camargo Cancer Center), Genival B Carvalho, Narimã Marques, Felipe J F Coimbra, Stênio C Zequi, Cassia Silva, Luiz P Kowalski (A.C. Camargo Cancer Center); Alberto Wainstein (Alberto Cavalcanti Hospital); Elaine Christine D Moisés, Ana Carolina Tagliatti Zani, Caio Antonio de Campos Prado (Centro de Referencia da Saude da Mulher de Ribeirão Preto - Mater); Carolina Panis, Daniel Rech, Ruan Gabriel Soares da Silva (Ceonc - Hospital de Câncer de Francisco Beltrão); Edwaldo E Joviliano (Clinics Hospital, Ribeirao Preto Medical School, University of Sao Paulo); Ricardo F Rezende, Igor G N Reis, Robinson E S Pires, Igor G N Reis (Felicio Rocho); Adriana Borgonovi Christiano (Fundacao Centro Médico de Campinas); Heitor F X Consani (Hospital Anhemed de Sorocaba); Felipe G Pugliesi (Hospital Brigadeiro); Flavio R Takeda,

Alessandro W Mariani (Hospital das Clínicas da Faculdade de Medicina da Universidade de São Paulo); Ricardo J B Valadares (Hospital de Base do Distrito Federal); Nelson A Andreollo, Luiz Roberto Lopes (Hospital De Clínicas da Unicamp); Cristiano Tonello, Nivaldo Alonso, Carlos Ferreira dos Santos (Hospital de Reabilitação de Anomalias Craniofaciais de Bauru); Leonardo S Lima, Wilson Salgado Jr (Hospital Estadual de Ribeirão Preto); Thiago H S Pereira (Hospital Estadual Serrana); Arthur Paredes Gatti, Ramon N L Oliva, Caroline N Nardi (Hospital Geral de Pirajussara); Alvaro F L Sousa, Ivonizete P Ribeiro, Herica E F Carvalho, Layze B Oliveira, Guilherme Schneider (Hospital Getúlio Vargas); William Augusto Casteleins (Hospital Marcelino Champagnat); Larissa M Silva (Hospital Médico Cirúrgico de Alagoas); Carlos Augusto Gomes (Hospital Monte Sinai); Alonço da Cunha Viana Júnior (Hospital Naval Marcílio Dias - Marinha do Brasil, HNMD/MB); Ricardo P Cruz (Hospital Nossa Senhora da Conceição); Gustavo MA Gomes, Igor L Buarque, Aldo V Barros (Hospital Santa Casa de Misericórdia de Maceio); Gustavo B Marangon (Hospital São Lucas Da Pucrs); Ronald LG Flumignan, Luís CU Nakano, Patrícia IF Pascoal, Brenna C Santos, Danielle AB Kuramoto, Rebeca M Correia, Fabio CF Amaral, Carolina DQ Flumignan (Hospital São Paulo, Federal University of São Paulo); Jairo A Dussán-Sarria (Hospital Unimed); Romeo L Simões (Hospital Unimed Gov. Valadares ); William Augusto Casteleins (Hospital Universitário Cajuru); Robson L Amorim, Jeancarlo S Silva (Hospital Universitário Getúlio Vargas/UFAM); Humberto F Lyra Junior, Nathalia S Julio, Marlus T Gerber, José Mauro dos Santos, Joao Carlos C de Oliveira (Hospital Universitário Professor Polydoro Ernani de São Thiago- HU/UFSC/EBSERH); Camila VC Palamim, Fernando AL Marson (Hospital Universitário São Francisco de Assis na Providência de Deus); Iolanda M Gomes (Instituto de Medicina Integral Prof Fernando Figueira); Priscila R Oliveira, Ana Lucia L M Lima, Vladimir C Carvalho, Jorge S. Silva (Instituto de Ortopedia e Traumatologia do Hospital das Clínicas da Faculdade de Medicina da Universidade de Sao Paulo); Ulysses Ribeiro Jr (Instituto do Cancer do Estado de São Paulo, Hospital das Clínicas da Faculdade de Medicina da Universidade de São Paulo); Gustavo Andrezza Laporte (Irmandade da Santa Casa de Misericórdia de Porto Alegre); Mateus Capuzzo Gonçalves, Lais S Botacin, Melissa AG Avelino (University Federal Hospital); Luiz Gustavo O Brito (Womens' Hospital (Hospital da Mulher)).

**Bulgaria:** Evguenia T Hristova (Fifth City Hospital Sofia - 5th MBAL); Vladislav Valentinov Stoyanov (Medical Institute of Ministry of Interior); Boris E. Sakakushev (UMHAT Saint George Plovdiv); Dragomir D Dardanov, Manol B Sokolov (University Hospital Alexandrovska); Ananya Mehta, Elitsa H. Gyokova, Mohamed Abdullahi, Martin P Karamanliev, Dobromir D Dimitrov (University Hospital Dr Georgi Stranski, Medical University - Pleven); Mihail T Slavchev, Boyko Ch Atanasov (University Hospital



Eurohospital); Tsanko I Yotsov (University Hospital Medica); Dimitar Bozhidarov Hadzhiev (University Hospital St George Jsc).

**Cambodia:** Simon E Stock (Handa Medical Centre).

**Cameroon:** Chukwuemeka Gerald Nwegbu, Tanyi John Tanyi, James A. Brown (Mbingo Baptist Hospital).

**Canada:** Jugal S Arneja (British Columbia Children's & Women's Health Centre); Susan M Lee (Eagle Ridge Hospital); Ramya Kancherla (McMaster University), Karen A Bailey (Hamilton Health Sciences Corp); Biniam Kidane (Health Sciences Centre); Pierre-Olivier Champagne (Hopital Enfant Jesus); Xiya Ma (Hôpital Maisonneuve-Rosemont); Allana Munro, Dolores M McKeen (IWK Health Centre); Janet Martin, Juan Glinka, Edward M Vasarhelyi, Yamini Subramani, Hilda Alfaro, Ushma J Shah, Nelson J Gonzalez, S. Danielle MacNeil, Mahesh Nagappa, Richard A Malthaner, Muriel Brackstone, Nawar A Alkhamesi, Mehdi Qiabi, Camila Arango-Ferreira, Agya B A Prempeh (London Health Sciences Centre and St Josephs Health Care London); Sinziana Dumitra (McGill University Health Center); Richard T Spence (QEII Victoria General Hospital); Eric LR Bedard (Royal Alexandra Hospital); Susan M Lee, Jessica G.Y. Luc (University of British Columbia); Brian R Johnston, Najmedden Attabib (Saint John Regional Hospital); Amit RL Persad (Saskatoon City Hospital/Royal University Hospital/St. Paul's Hospital); Sunit Das, Amir Khoshbin, Karim S Ladha, Ashwin Sankar, Bijan Teja, Julian F Daza (St. Michael's Hospital); Veronica F Chan (Sunnybrook Hospital); Reto M Baertschiger, Augusto Zani (The Hospital For Sick Children, Toronto); Carolyn Nessim, Daniel I Mclsaac (The Ottawa Hospital); Mandeep Singh (Women's College Hospital, and Toronto Western Hospital); Abdollah Behzadi (Trillium Health Partners); Angela J Dell, Salim M Al Riyami, Khaled Z Dajani, David Bigam, Vinod K Manikala (University of Alberta Hospital); John T Street, Kelly V Mayson (Vancouver General Hospital); Christopher J D Wallis (Mount Sinai Hospital and University Health Network).

**Chile:** Ximena Mimica (Fundación Arturo Lopez Perez); Maria Marta Modolo (Hospital Barros Luco Trudeau); Julio Villanueva, Roberto Altamirano (Hospital Clínico San Borja-Arriarán); Sofia Weissbluth (Hospital Clinico Universidad Católica); Diego I Marin (Hospital La Florida Dra Eloísa Díaz); Maricarmen Olivos, Bruno Catoia Fonseca, Andrés J Hodali, Bruno Catoia Fonseca, Andrea I Ramos, Marco A Valenzuela, Janina J. Torres (Hospital de Niños Roberto del Río/ Universidad de Chile).

**China:** Yi Song (The First Affiliated Hospital of Zhengzhou University); Wah Yang (The First Affiliated Hospital of Jinan University); Mohammed Safi, Abdullah Aldanakh (The First Hospital of Dalian Medical University); Mohammed Alradhi (The Second Hospital of Dalian Medical University); Yidong Lyu, Yan Chen (The Third Affiliated Hospital of Zhengzhou University).

**Colombia:** Angélica V Fletcher, Daniela Camargo G (Centro de Investigaciones Oncológicas Clínica San Diego - CIOSAD); Rafael Figueroa Casanova (Clinica Avidanti - Ibaguë); Camilo Andres Caicedo Medina, Dinimo Bolivar (Clinica Colsubsidio Calle 94); Tatiana Carolina Beltran Garcia (Clinica Palermo); Nestor F Pedraza, Andrea Garcia-Lopez, Nasly G. Patino-Jaramillo, Fernando A Giron (Colombiana de Trasplantes); Carlos J- Perez Rivera (Fundación Cardioinfantil-IC); Albaro José Nieto-Calvache, Fredy Ariza (Fundación Valle del Lili); Claudia Milena Orozco-Chamorro, Maria A Nanez, Diana S Garces (Hospital Susana Lopez de Valencia); Luis M Figueroa, Marisol Badiel, Delio F Martinez, Brenda Coll-Tello, Hector F Camelo, Antonio J Montoya Casella, Sebastian Ordoñez, Paola A Velez Sanchez, Juan C Salcedo, Lina M Villegas, Jorge A Holguín (Hospital Universitario del Valle Evaristo García); Jesús Hernán Tovar Cardozo, Jorman Harvey Tejada Perdomo, Valentina Gutiérrez Perdomo (Hospital Universitario Hernando Moncaleano Perdomo); Natalia A Rivera-Rincon, Paula Torres Gomez, Elena Leonor Delgado-Nieto, Andres Isaza-Restrepo, Felipe Vargas, Ana M Vargas, Arnulfo Andrade Castro, Jorge A Navarro, Saul E Vargas (Hospital Universitario Mayor-Universidad del Rosario); Jose A Calvache (Hospital Universitario San José); Maria C Mendoza-Arango (Hospital Universitario San Vicente Fundación); Jorge Luis Vélez Bernal, Felipe O Gonzalez (Instituto Nacional de Cancerología).

**Croatia:** Goran Šantak (County General Hospital Pozega); Iva Kirac (Sestre Milosrdnice University Hospital Centre); Dorian Kršul, Ana Bosak Versic (University Hospital Center Rijeka); Goran Augustin, Tomislav Kulis, Zeljko Kastelan, Ana Danic Hadzibegovic, Kresimir Grsic, Tvrtko Hudolin (University Hospital Centre Zagreb); Marko Tarle, Matija Mamic, Mia Lorencin, Ivica Luksic (University Hospital Dubrava); Dubravko Habek (University Hospital Sveti Duh); Suzana Konjevoda, Jakov Mihanovic (Zadar General Hospital).

**Cyprus:** Stavros A Antoniou (Mediterranean Hospital of Cyprus); Heyam A Almezghwi (Near East University Hospital); Nikolaos Gouvas (Nicosia General Hospital).

**Czechia:** Lubomir Martinek (Hospital & Oncological Centre Novy Jicin); Rene Novysedlak (Motol University Hospital); Jan Žatecký (Slezská nemocnice v Opavě, p.o.).

**Denmark:** Peter Christensen (Aarhus University Hospital); Christian S Meyhoff (Copenhagen University Hospital - Bispebjerg and Frederiksberg); Mark Bremholm Ellebæk (Odense and Svendborg University Hospital).

**Dominican Republic (the):** Sylvia Jeanne Batista, Julia Rodriguez (CEDIMAT - Centro de Diagnóstico, Medicina Avanzada, Laboratorio y Telemedicina); Dolores Mejia De la Cruz, Dolores Mejia De la Cruz (Hospital General Plaza de la Salud); Mirna Giselle Santiago Jimenez (Oncology Institute Dr. Heriberto Pieter).

**Ecuador:** Carla M Dominguez, José R. Negrete, Pedro N Campuzano (AXXIS Hospital Quito Ecuador); Daniel L Mogrovejo (Hospital Metropolitano); Maria J Armas (Hospital Padre Carollo); Jenny E Arboleda-Bustan (Hospital Pediatrico Baca Ortiz); Eddy P Lincango-Naranjo (Hospital Vozandes Quito).

**Egypt:** Mohamed El-Kassas (Badr University Hospital - Helwan University); Ahmed K. Awad, Emad Alazab, Kyrillos G Abdulmaseh, Sherein Diab, Mostafa H.Abd El Wahab, Amr Darwesh, Badr E Mostafa, Mahmoud Shaban Abdelgalil, Sherein Diab, Merihan A. Elbadawy, Ali M Reda (Ain Shams University Hospitals); Amir Fathi Asla (Al Ahrar Teaching Hospital); Notaila M Fayed (Al Qanayat Central Hospital); Mohamed S Ahmed (Al Taiseer hospital); Menan Ahmed Elsadek, Dalia Elsayed Gad, Aya Gameel El Saadany (Al Zahraa University Hospital); Aalaa Mohamed Elsadek, Amir Fathi Asla (Al-Ahrar teaching hospital); Ahmed E Sayed, Ahmed Naeem (Al-Azhar University Hospital); Abdullah Al-Mallah, Ahmed A Abdelsamed (Al-Azhar University Hospitals); Moataz Ewedah, Mohamed O Soliman, Yousef Tanas, Mohammed Hamouda, Marina H Mahfouz, Manal E Abdo, Yomna E Dean, Karim Lka, Aya O Abodeeb, Fouad M F B Ashoush, Roqaiya R Elsherbiny, Mohamed Gadelkarim (Alexandria Main University Hospital); Nermin A Osman, Maya M.Ibrahim (Alexandria Medical Research Institute); Nehal G Youssef (Alpha Vision Center); Moha med Hamdy Ibrahim (Aman specialized hospital); Antonios Soliman (Assiut University Hospital for Neuropsychiatry and Neurosurgery); Rabea A Gadelkareem (Assiut Urology and Nephrology, Assiut University Hospitals); Ahmed M. Abbas, Aliae AR Mohamed Hussein, Khaled Abdelsattar (Assiut University Heart Hospital) Kassem Mohammed, Islam H Ibrahim, Hussein Elkhayat, Ramy A. Hassan, Ahmed A A Hassan, Ahmed Wahba Saad Sayed, Abdulrahman Mahdi Hussien, Esam Abdalla, Mohamed Esmat Mohamed, Rabea A Gadelkareem, Mohammed Nagy Elammery, Mahmoud M Saad, Hossam M Abubeih, Islam H. Ibrahim, Ahmed Mokhtar, Mario A. Sorial, Mahmoud Sallam, Mohamed El Adel, Mahmoud Alhussaini (Assiut University Hospital); Ahmed Maher (Assiut University

Children's Hospital); Mohamed M Elabd, Hassan Abdelazim (Bab El-Shareia University Hospital, Faculty of Medicine, Al-Azhar University, Cairo); Maher H. Ibraheem (Baheya Foundation for Treatment of Breast Cancer); Yasser A Noureldin (Benha University Hospital); Mahmoud Elfiky, Mohamed A Ebrahim, Ahmed Saber Mohamed Abdelrahman, Mahmoud Marei Marei, Aya M Elkhalawy (Cairo University Hospitals, Cairo University, Faculty of Medicine, Kasr Alainy); Ahmed Y Azzam, Mohammed A Azab (Damietta Specialized Hospital); Ahmed H Elmasry (El Dawly Hospital); Ahmed K Awad, Amr Elgazar, Mahmoud Mohamed Mohamed Shalaby, Mohammad S Mahmoud, Mohamed G Qassem, Hussein Kinani, Abdelrahman M Wahba, Merihan A. Elbadawy, Rana Hisham Ezzat , Mai H Ahmed, Mohamed Elemam Elshawy, Hazem Metwally Faragalla, Khalid D. Mahmoud (El Demerdash University Hospital); Ahmed M Nafea (El Hadara University Hospital Alexandria University); Mohamed Abdel-Maboud, Hesham Abozied, Modather Moharam (AL-Hussein University Hospital, Faculty Of Medicine, Al-Azhar University, Cairo); Ashraf H Shehata, Samir A ElKafrawy, (El-Sahel Teaching Hospital); Mosaab M Tayiawi (El-Mery Alexandria University Hospital); Hosam M Elghadban (Elsafa Private Hospital); Moataz M Emara, Ahmed Shehta (Mansoura University, Gastrointestinal Surgery Center); Amira M Saqr (Imbaba General Hospital); Wafaa M Abdelelsalm, Eslam M Elshennawy (Kafr-Elsheikh University Hospital); Samar T Radwan, Selmy S Awad, Sameh H Emile, Wesam A Aldosoky, Hossam Elfeki , Sara N Gendi, Hala Adel Abdelsalam, Mohammed Hammad, Hossam Elfeki, Mostafa Shalaby, Ahmad Hammad Sakr, Mohamed A. Abdelmaksoud (Mansoura University Hospital); Mohammed Alawady (El Matareya Central Hospital); Abdelrahman Azzam Omran, Abdallah R Allam, Zainab Ismail, Khaled M Gaballah, Mahmoud Fathy Mahmoud AlGady, Ahmed M Raslan, Khaled Gharbia, Khaled Gharbia, Abdelazez A Nuser (Menoufia University Hospital); Ahmed Kamal Sayed (Minia University Hospital, Minia); Abdullah Al-Mallah (Nasr City Hospital For Health Insurance); Mahmoud A Elshahawy (Nasser Institute for Research and Treatment); Galal Ghaly (National Cancer Institute); Ahmed Elshawadfy Sherif (National Liver Institute, Menoufia University); Abdelrahman M Makram, Omar M Makram, Ola Ahmed, AbdelRahman M A Helmy (October 6 University Hospital); Khaled M Abdelwahab, Mohamed Abdelkhalek, Islam H Metwally, Mosab Saad Shetiwy, Mohammad Zuhdy, Salma I. Ramadan (Oncology Center Mansoura University); Mohamed Abdelghany (Qena General Hospital); Mohammed A Omar (Qena University Hospitals) Ahmed S ElHawary (Qena University Hospital); Ziad A Soliman, Hossam T Ali (Qous Central Hospital); Salma Elnoamany (Shebeen Elkoom Hospital); Sherief Ghozy (Sheikh Zayed Specialized Hospital); Alzhraa S Abbas (Sheikh Zayed Specialized Hospital); Mostafa A Shehata (Smouha University Hospital); Sahar A Mahmoud, Mohammed A Elsaman (Sohag University Hospital); Elsayed A Fayad, Asmaa Radwan, Ahmed I El-Sakka, Asser Sallam (Suez Canal University Hospital); Mohamed G

Elbahnasawy, Eslam S Esmail, Ahmed Maher Hawila, Eslam S Esmail, Mohamed K Hamada, Sara H Motawea, Mohamed S Morsy (Tanta University Hospital); Hatem Refaat El-Sheemy (The Memorial Soaad Kafafi University Hospital); Mahmoud Ahmed Ebada, Ali H Khedr, Ahmed Gad (The National Hepatology and Tropical Research Institute); Omar Elmandouh, Reem Elmandouh (Wingat Royal Hospital); Souad Alkanj, Mohammad G Youssef, Kamal Awad, Maged Mohammed, Ahmed H Elsayad (Zagazig University Hospitals).

**Estonia:** Tõnu Rätsep (Tartu University Hospital).

**Ethiopia:** Melatework A Wolle (Adisalem Primary Hospital); Abraham G. Negussie (ALERT center); Misganaw A Adimass (Tibebe Ghion Specialized Hospital, Bahir Dar University); Bereket Tsegaye Misganaw (Debre Berhan Comprehensive Specialized Hospital); Yoseph S Bezabih (Debre Markos Comprehensive specialized Hospital); Biniam Zemedu Assefa (Dessie Referral Hospital); Getachew W Shumye (Gondar University Comprehensive specialized hospital); Mengistu G Mengesha, Dagnachew Y Gechera (Hawassa University Comprehensive Specialized Hospital); Adnan A Mohammed (Hiwot Fana specialized University Hospital); Gersam A Mulugeta, Yonas Y Metaferia, Ashebir B Kifetew, Eyueal A Degefa, Yadani M Deressa (Jimma University Medical Center); Kebebe Bekele Gonfa, Zewdie G Bedane, Alem M Ayalew (Maddawalabu University Goba Referral Hospital); Henok Teshome Ayele, Engida Abebe, Bereket Atnafu Worku (Saint Paul Hospital Millennium Medical College); Million M Sisay (Saint Peter Specialised Hospital); Dawit Worku Kassa, Atalel F Awedew, Abera C Bayable, Abraham Genetu Tiruneh, Samuel Hailu, Yilkal T Numaro, Yonas Ademe, Abat S Baleh, Thomas B Megerssa, Segni Kejela (Tikur Anbessa (Black Lion) Specialized Hospital, Addis Ababa University); Habtamu T Derilo (Wachemo University Nigist Elleni Mohammed Memorial Referral Hospital); Yemisirach B Akililu (Zewditu Memorial Hospital).

**Finland:** Iris Lebbe (Kanta-Häme Central Hospital); Elise K Sarjanoja (Länsi-Pohja Central Hospital); Joonas H Kauppila, Juha-Jaakko Sinikumpu (Oulu University Hospital); Salvatore Giordano (Turku University Hospital).

**France:** Elie Kantor, Romy Soussan (AP-HP Hopital Bichat Claude Bernard); Cipolat Mis Tommaso (Beaujon Hospital), Alban Zarzavadjian Le Bian (Avicenne Hospital); Francesco Nappi, Tristan Morichau-Beauchant, Julien Nahum, Jean-Michel Maillet, Mathieu Godement (Centre Cardiologique du Nord); Lionel Jouffret (Centre Hospitalier Avignon); Federico Migliorelli (CHU Toulouse); Belinda De Simone (Centre Hospitalier Intercommunal Poissy

Saint Germain en Laye); Laurent Brunaud, Thomas Fuchs-Buder (CHU Nancy); Sylvie Testelin (CHU Amiens); Kim Bin, Sophie Boucher, Françoise Schmitt (CHU Angers); Zaher Lakkis (CHU Besançon); Luke Harper (CHU Bordeaux); K Slim (CHU Clermont-Ferrand); Guillaume Piessen, Clarisse Eveno (CHU Lille, Hôpital Claude Huriez); Quentin Ballouhey, Abdelkader Taibi (CHU Limoges); Vincent Crenn, Emilie Duchalais (CHU Nantes); Alexis P Arnaud, Olivier Azzis (CHU Rennes - Hopital Sud); Jean-Jacques Tuech (CHU Rouen); Charlotte Vaysse (CHU Toulouse); Ariane Weyl (CHU Toulouse); Kelig Vergriete (CHU Toulouse); Helene Charbonneau (Clinique Pasteur); Anne-Cecile Ezanno, Brice Malgras (Hia Begin); Celeste Del Basso, Celeste Del Basso (Hôpital Antoine-Béclère); Igor Duquesne, Federico Bernabei, Pierre-Raphaël Rothschild (Hôpital Cochin - APHP); Olivier Abbo (Hôpital des Enfants -CHU Toulouse); Gilles Manceau, Alexandre Chamouni (Hôpital européen Georges-Pompidou); Célia Crétolle (Hôpital Necker Enfants Malades - APHP); Laurent Arnalsteen (Hôpital Privé La Louvière); Elie Mikhael, Andrea Police, Rosa Montero-Macias, Vincent Villefranque (Hôpital Simone Veil); Emeline Maisonneuve, Tristan Langlais (Hôpital Trousseau - APHP); Barbara Seeliger, Patrick Pessaux, Cristians A Gonzalez, Antonio D'Urso (IHU-Strasbourg/Strasbourg University Hospitals); Martina A Angeles (Institut Claudius Regaud - Institut Universitaire du Cancer de Toulouse); Agathe Seguin-Givelet (Institut Mutualiste Montsouris); Marc Danguy Des Deserts (GETBO, Hôpital d'Instruction des Armées Clermont Tonnerre); Sebastien Gaujoux, Charles de Ponthaud, Emmanuel J Chartier-Kastler (Pitie Salpetriere, Sorbonne Université); Liza Ali, Matthieu Peycelon (Robert Debré Children University Hospital, APHP, MARVU Reference Center, Université Paris Cité); Diane Mege (Timone).

**Georgia:** Zaza Demetrashvili (N.Kipshidze Central University Clinic).

**Germany:** Mircea G Stoleriu (Asklepios Pulmonary Hospital Munich-Gauting); Lena Keppler, Tim Saier (Berufsgenossenschaftliche Unfallklinik Murnau); Christian Konrads (BG Klinik Tübingen); Christian Tapking (BG Trauma Center Ludwigshafen); Carsten Kamphues (Charité University Medicine - Campus Benjamin Franklin); Dirk R Bulian (Cologne-Merheim Medical Center (CMMC), Witten / Herdecke University); Andrea Schmedding (Frankfurt University Hospital, Goethe University); Johannes Doerner (Helios Universitätsklinikum Wuppertal (Universität Witten/Herdecke)); Anna E Gut (Isarklinikum); Jens Rolinger, Andreas Kirschniak (Kliniken Maria Hilf Mönchengladbach); Lars Schröder (Klinikum Hanau); Daniel Reim, Seyer Safi, Andreas M Fichter, Arthur Wagner, Bernhard Meyer, Jens Gempt (Klinikum Rechts der Isar, TUM School of Medicine); Armin R Sablotzki, Armin R Sablotzki (Klinikum St Georg); Jonas Herzberg, Manuel Altenburg, Ferhat Yenilmez, Jan Meins, Louai A Aghwan (Krankenhaus Reinbek St. Adolf-Stift); Nikolaus Börner, Alexander

M Keppler, Markus Albertsmeier (Ludwig Maximilian University of Munich - Großhadern); Steffen Seyfried, Marie-Claire Rassweiler-Seyfried, Maximilian Kriegmair, Karl-Friedrich Kowalewski (Mannheim University Medical Center (Universitätsmedizin Mannheim)); Konstantinos Gousias (St Marien Hospital Lünen); Johanna J Strotmann, Philipp Höhn, Julian Horn, Julia M Knipschild, Leonie Siemen, Andreas Minh Luu, Johanna J Strotmann (St. Josef-Hospital); Raymund E. Horch (Universitätsklinikum Erlangen); Aaron Lawson McLean (Universitätsklinikum Jena); Judith Anne Teresa Lindert (University Hospital Schleswig- Holstein, Lübeck); Sebastian Ziemann, Ali Modabber, Philipp Winnand, Frank Hölzle (University Hospital Aachen); Björn Sommer, Sebastian Wolf, Ehab Shiban (University Hospital Augsburg); Florian Recker, Erdem Güresir, Thomas M Randau, Agi Güresir, Markus Velten, Tim O Vilz, Markus Velten, Maria Wittmann, Maria A Willis, Tim R Glowka, Florian Recker (University Hospital Bonn); Ulrich Bork (University Hospital Carl Gustav Carus, Technical University Dresden); Matthias Hecker, Andreas Hecker, Martin Reichert (University Hospital of Giessen); Clemens Miller, Marcus Nemeth (University Medical Centre Goettingen / Universitätsmedizin Göttingen); Ulrich Ronellenfitsch, Jorg Kleeff, Kerstin Lorenz, Ulrich Kisser, Rick Schneider, Ingmar Seiwert (University Hospital Halle (Saale)); Georg Osterhoff (University Hospital Leipzig); Valerie C Linz (University Hospital Mainz); Michael R Mallmann, Alexander C Rokohl, Ludwig M Heindl, Philomena A Wawer Matos, Claus Cursiefen, Christoph A Mallmann, Christian M Domroese (University Hospital of Cologne); Alfred Königsrainer, Can Yurttas, Karolin Thiel (University Hospital Tuebingen); Julius M Vahl (University Hospital Ulm); Armin Wiegering, Johan F Lock (University Hospital Würzburg); Annika Heuer, Alonja Reiter, Martin Stangenberg, Arne Böttcher (University Medical Center Hamburg-Eppendorf); Daniel Kaemmerer (Zentralklinik Bad Berka).

**Ghana:** Kofi T Mensah (Agogo Presbyterian Hospital); Frank E Gyamfi (Berekum Holy Family Hospital); Isabella N M Opandoh, Emmanuel O Ofori, Ebikela I Baidoo, Richard O Baidoo, Diallo A Azize, Peter Appiah-Thompson, Evans K Agbeno, Sebastian Ken-Amoah, Ganiyu A Rahman, Richard Kpangkpari, Luke A Aniakwo, Michael Nortey, Meshach M Agyapong, Benedict Boakye , Philip Mensah, Kwasi Agyen-Mensah, Mabel P Amoako-Boateng, Samuel Mensah, Sam Debrah (Cape Coast Teaching Hospital); Mustapha Yakubu (Dormaa Presbyterian Hospital); Leslie Issa Adam-Zakariah (Effia Nkwanta Regional Hospital); Anthony Davor, Joshua Arthur, Mawutor Dzogbefia, Anna Konney, Thomas O Konney, Michael Amoah, Isaac Barnor, Mohammed Duah Issahaliq, Paa Ekow Hoyte- Williams, Wilfred K Sam-Awortwi Jnr, Bernard Hammond, Ronald Awoonor-Williams (Komfo-Anokye Teaching Hospital); Nuhu N H Naabo, Adu Appiah-Kubi (Ho Teaching Hospital); Kekeli Kodjo Adanu, Joe-Nat A Clegg-Lampsey, Jefferson Owusu Adaye (Korle-Bu

Teaching Hospital); Theophilus T K Adjeso, Mundashiru Yahaya, David A Ansah-Agyei, Ana Maria Simono Charadan, Magdiel Rodriguez Labrada, Adamu Issaka, Iddrisu B Yabasin, David A Antwi , Lukman Manan, Mohammed I S Bukari, Alexis D B Buunaaim, John Abanga Alatiiga, Mohammed Sheriff, Emmanuel O Kumi, Gilbert B Bonaana (Tamale Teaching Hospital).

**Greece:** Georgia Micha, Nikolaos Kiriakopoulos, Konstantinos Stroumpoulis, Konstantina Kalopita, Ioannis Grypiotis ("Helena Venizelou" General and Maternity hospital of Athens); Kyriakos A Psarianos (Achillopouleio General Hospital of Volos); Theodoros Aslanidis (Agios Pavlos General Hospital); Dimitris P Korkolis, Evangelos Fradelos (Agios Savvas Anticancer Hospital); Alexandra Arvanitaki (Ahepa University General Hospital of Thessaloniki); Anastasia Prodromidou, Nikolaos Thomakos, Charalampos Theofanakis, Kyveli Angelou, Dimitrios Haidopoulos, Michail Diakosavvas (Alexandra General Hospital); Leonidas Chardalias, Ioannis Papaconstantinou, Pantelis T Antonakis, Dimitrios Politis, Dionysios Dellaportas, Christina I Kontopoulou, Nikolaos A Memos, Antonios Gklavas, Konstantinos Bramis (Aretaieion University Hospital); Panagiotis Pappas (Athens Bioclinic Hospital); Thalia Petropoulou (Athens Euroclinic); Argyrios Ioannidis, Dimitrios Ntourakis (European University Cyprus); Dimitrios Papageorgiou, Dimitrios K Manatakis, Christos G Barkolias, Dimitrios Balalis , Nikolaos P Tasis (Athens Naval and Veterans Hospital); Theodoros A Sidiropoulos, Nikolaos V Michalopoulos, Maria Papadoliopoulou, Stavros Parasyris, Nikolaos Danias, Panteleimon Vassiliu, Zoe Petropoulou, Ioannis Margaritis, Eirini Kefalidid, Dimitrios Papaconstantinou (Attikon University General Hospital); Kosmas I. Paraskevas (Central Clinic of Athens); Alexandrina S Nikova, Theodosia Kalamatianos, Konstantinos Stamatis, Maria Sotiropoulou, George Stylianidis (Evangelismos General Hospital); Gregory P Kouraklis, Anna Paspala, Constantinos Nastos (Evgenideio Hospital); Dimitrios Sfoungaris, Ioannis A Valioulis, Dimitrios Raptis (G. Gennimatas Thessaloniki General Hospital); Nikolaos Tsakiridis, Konstantinos Alexandros Tsakiridis, Konstantinos Arvanitakis (General Hospital of Florina); Christos Kalfountzos, Georgios D Koukoulis, Konstantinos Bouliaris, Vasileios A Lachanas, Christos A Doudakmanis (General Hospital of Larissa "Koutlimpaneio and Triantafylleio"); Christos Chouliaras, Aristeidis Papadopoulos (General Hospital of Nikaia); Maria P Ntalouka, Dimitrios Magouliotis, Maria Fergadi, Athina A Samara, Grigorios Christodoulidis, Metaxia Bareka, Thanos Athanasiou, Eleni M Arnaoutoglou, Jiannis Hajjiannou, Konstantinos Perivoliotis, Ioannis Baloyiannis, Fragkiskos A Angelis, Konstantinos G Stamoulis, Dimitrios Symeonidis, Christos Korais, Eleni Gkrinia, Anna-Maria Ntziovara, Dimitrios Symeonidis, Ioannis Baloyiannis (General University Hospital of Larissa); Francesk Mulita, Konstantinos Bouchagier, Georgios I Verras, Maria I Argentou, Michail Vailas, Stylianos Germanos, Panagiotis Tavlas (General



University Hospital of Patras); Dimitris Tatsis, Ioannis T Astreidis, Alexandros Louizakis, Asterios Antoniou, Konstantinos Paraskevopoulos (George Papanikolaou General Hospital of Thessaloniki); Georgios Chrysovisiotis, Maximos Frountzas, Konstantinos G Toutouzas, Aristeidis Chrysovergis, Spyridon Potamianos, Efthymios Kyrodimos, Vasileios Papanikolaou, George Theodoropoulos, Tania Triantafyllou, Andreas Larentzakis, Athina-Despoina Kimpizi (Hippocratio General Hospital); Ioannis Tsakiridis, Georgios Kapetanios, Themistoklis Dagklis (Hippocratio General Hospital of Thessaloniki); Stamatios Petousis, Chrysoula Margioula-Siarkou (Hippocratio General Hospital of Thessaloniki); Efstratia Baili (Iaso Private General Obstetric Gynecological & Paediatrics Clinic Diagnostic Therapeutic & Research Center SA (IASO)); Ekaterini C Tampaki (KAT Athens General Hospital); Eftychios Lostoridis (Kavala General Hospital); Emmanouil C Avramidis, Andreas P Efstathiou, George C Babis (Konstantopouleio General Hospital of Athens); Konstantinos Roditis, Paraskevi V Tsiantoula (Korgialenio-Benakio Hellenic Red Cross Hospital); Nikolaos Machairas, Dimitrios Schizas, Stylianos Kykalos, Panagiotis I Dorovinis, Paraskevas Stamopoulos, Alexandros K Charalabopoulos, Theodore Liakakos, Elias Koziakas, Ioannis Karavokyros, Antonia Skotsimara, Athanasios Syllaios, Gerasimos S Tsourouflis, Nefeli K Tomara (Laiko University Hospital); Angelos Dimas (Lefkada General Hospital); Konstantinos G Apostolou (Mediterraneo Hospital); Ioannis Tsouknidas (Naval and Veterans Hospital of Crete); Evangelia Samara, Nikolaos A Papakonstantinou, Areti Falara (Onassis Cardiac Surgery Center); Kyriakos Papavasiliou, Ioannis D Siasios, Christos Kaselas, Christos Anthoulakis, Konstantinos Tigkiropoulos (Papageorgiou General Hospital); Eleftherios Spartalis (Rea Maternity Hospital); Panagiotis Mourmouris, Konstantinos Tsekouras, Lazaros Tzelves, Georgia Dedemadi, Georgia Dedemadi (Sismanoglio - Amalia Fleming General Hospital); Stylianos Gaitanakis (Sotiria General Hospital of Thoracic Diseases); Athanasios Marinis, Konstantinos Stamatou (Tzaneio General Hospital); Pinelopi D Vlotinou (University Hospital of Alexandroupolis); Sofia Xenaki, Konstantinos Lasithiotakis, Taxiarchis Konstantinos Nikolouzakis, Taxiarchis Konstantinos Nikolouzakis (University Hospital of Heraklion Crete); Agathi Karakosta, Petros Tzimas, Panagiotis Charatsaris (University Hospital of Ioannina).

**Guatemala:** Gustavo Recinos (Hospital De Accidentes Ceibal); Marlon D Vega (Hospital General De Enfermedades); Maria L Aguilera, Pablo J Rivera, Dianne A Sosa, Tania A Salazar (Hospital General San Juan De Dios); Natalia I Ybarra (Hospital Nacional de Chimaltenango); Ever E Morataya (Hospital Nacional de Tiquisate); Estuardo J Brolo (Hospital Universitario Esperanza); Andrea M Lowey, Jose R Paiz (Sanatorio Las Majadas).

**Hong Kong:** George KC Wong, Samuel KK Ling, Calvin SH Ng, Rainbow WH Lau, Kaori Futaba (Prince of Wales Hospital).

**Hungary:** Dezso Toth (Institute of Surgery, University of Debrecen); Attila Zaránd, Laszlo Piros (Semmelweis University).

**India:** John A Santoshi, Manoj Nagar, Adesh Shrivastava, Zainab Ahmad, Prateek Behera, Megha Gautam (All India Institute of Medical Sciences, Bhopal); Dinesh Bagaria, Apoorva P Kabra, Samarth Mittal, Piyush Ranjan, Shilpa Sharma, Vivek Trikha, Dinesh Kumar Bagaria, Junaid Alam, Prabudh Goel, Surya Kumar Dube, Narendra Choudhary, Ramesh P Menon (All India Institute of Medical Sciences, New Delhi); Rajkumar Kottayasamy Seenivasagam, Abhishek Agrawal, Kinjal S Majumdar, Pranati Sharma, Amit Gupta, Rajnish K Arora, Poonam Arora, Somprakas Basu, Farhanul Huda, Lena E David, Aakansha G Goswami, Rajat Piplani (All India Institute of Medical Sciences, Rishikesh); Mahesh Sultania, Sujit K Tripathy, Tushar S Mishra, Dillip Kumar Muduly, Saubhagya Kumar Jena, Abhijeet Mishra, Jayanta K Mitra, Sweta Singh, Ranjit Kumar Sahu, Chitta R Mohanty, Saubhagya K Jena, Ritesh Panda, Kiran Kumar Boyina, Saubhik Dasukil (All India Institute Of Medical Sciences - Bhubaneswar); Nitesh Gahlot, Naren P Khatri, Amanjot Kaur, Jeewan R Vishnoi, Naveen Sharma, Ankita Chugh, Mahendra singh, Sourabh S Chakraborty (All India Institute of Medical Sciences, Jodhpur); Anupama Rajanbabu (Amrita Institute of Medical Sciences and Research Institute); Reem Hunain (Aralaguppe Mallegowda District Government Hospital); Monish S Raut (Artemis Health Institute); Diwakar Pandey (Balco Medical Centre); Raghubir Srivastava (Balrampur Hospital); Ajesh Raj Saksena (Basavatarakam Indo American Cancer Hospital & Research Institute); Mebanshanbor Garod (Bethany Hospital, Shillong); Bhargavi R Budihal, Shankarsai Kashyap, Pavani B Agarwal (BGS Global Institute of Medical Sciences); Swati Chhatrapati, Charulata Deshpande, Lipika amresh baliarsing (BYL Nair Hospital); Kalpana balakrishnan (Cancer Institute (WIA) Regional Cancer Centre); Ahmed Sayeed Tanweer (Candy Children's Hospital); Parvez David Haque, Sathiafrey D A Chitresh, Swati Daniel, Rohini Dutta, Uma Kant Dutt, Karan Garg, Mukul Garg, Christina George, Dhruva Ghosh, Pariza Gupta, Ritu Jain, Jeffrey A Kalyanapu, Savleen Kaur, Ankita Khurana, Sarita Khurana, Jatin Kumar, Dootika Liddle, Amit Vipran Mahajan, Pranay Pawar, Konda Samuel Paul Pradeep, Reuben R Ranadive, Arti Rajkumar, Vivin Daniel Sam, Jerrin Regi Sam, Habie Thomas Samuel, Sangeetha Samuel, Prateek Sahi, Aditya Sood, Nitish Srivastava, Alen J Thomas, Naveen J Thomas, Jacob K Varkey, Vigy Georgekutty Vazhakalayil, Rahul William (Christian Medical College & Hospital Ludhiana); Rohin Mittal, Sreekar Devarakonda, Jeyashanth Rijju, Vinotha Thomas, Moonish V Sivakumar , Rajeevan Philip Sridhar, Gilbert S Jebakumar, Negine Paul, Albert A Kota, Pushplata Kumari, Suraj

Surendran, Raji Suraj, Naveen Sundaram Victor, Kathir Joyson D R, Vidya Konduru (Christian Medical College & Hospital, Vellore); Kashish Malhotra (Dayanand Medical College, Ludhiana); Ashwin Rammohan, Mohamed Rela (Dr.Rela Institute & Medical Centre); Vaibhav Jain (Gandhi Medical College & Hamidia Hospital), Nitu Mishra (Gandhi Medical College and Sultania Zanana Hospital); Ashish Jakhetiya (Geetanjali Medical College and Hospital); Vidhi K Patel (GMERS Medical College and Hospital); Karuna Sree Pendyala (Government Dental College and Hospital); Manisha Aggarwal, Shyam K Gupta, Ashwani Kumar (Government Medical College, Jammu, J&K); Manpreet Singh Bindra (Government medical college hospital); I Yadev, Meer M Chisthi, Soumya S. (Government Medical College Thiruvananthapuram); Sachit Anand (Holy Heart Super Speciality Hospital); Jyotsna Rani (Indira Gandhi Institute of Medical Sciences); Kanika Sharma (Institute of Medical Sciences- Banaras Hindu University); Indranil Ghosh (Institute of Neurosciences, Kolkata); Shalini Sundaraju (Ivy Hospital, Mohali, Punjab); Prasanth Penumadu, Krishna Kumar Govindarajan, Ramanitharan Manikandan (Jawaharlal Institute of Postgraduate Medical Education and Research); Alfie J Kavalakat (Jubilee Mission Medical College & Research Institute); Ashish Phadnis, Piyush Jadhao (Jupiter Hospital); Shankar Subbarayan (K.A.P.Viswanatham Government Medical College); Reem Hunain, Gabriel Rodrigues, Sufyan Ibrahim, Zeeshan BM Hameed (Kasturba Medical College, Manipal); Sanoop K Zachariah (Kerala Institute of Medical Sciences - KimsHealth, Trivandrum); Irappa V Madabhavi (Kerudi Cancer Hospital, Bagalkot, Karnataka, India.); Varun V Bansal (King Edward Memorial Hospital), Tushar Garg (Johns Hopkins University School of Medicine); Shiv Rajan, Ahmad Ozair, Akhilanand Chaurasia, Pooja Ramakant, Manju L Verma, Ayushi Shukla, Anjoo Agarwal , Ankur Bajaj, Somil Jaiswal, Brijesh Mishra (King George's Medical University); Yuvaraja Thyavihally, Santosh S Waigankar, Santosh Subhash Waigankar (Kokilaben Dhirubhai Ambani Hospital); Siddhi Hegde (KVG Medical College & Hospital); Philip V Alexander (Lady Willingdon Hospital); Rahul Deo Sharma (Lilavati Hospital & Research Centre); Vivek M Sodhai (King Edward Memorial Hospital); Kunal Kishore (Lord Buddha Koshi Medical College & Hospital); Ramya M Vishweshwara (Mandya Institute of Medical Sciences); Lovenish Bains (Maulana Azad Medical College); Sanjeev Kumar , Akshat Malik (Max Superspeciality Hospital); Zahiya Hareem Shaikh (Mazumdar Shaw Cancer Centre, Narayana Health); Priyanka Kumari (Narayan Medical College & Hospital); Jerin J Thomas (National Institute of Medical Sciences and Research); Sanjay Kumar Yadav, Ritika Dhurwe (Netaji Subhash Chandra Bose Medical College); Upamanyu Nath (Nil Ratan Sircar Medical College and Hospital); Hitesh Chopra (Chitkara University, Chandigarh Punjab); Vishal Kumar, Lileswar Kaman, Madhivanan Karthigeyan, Manjul Tripathi, Sandeep Mohindra, Pravin Salunke, Kavindra Singh, Karthick Rangasamy, Nirmal Raj Gopinathan, Anshul Siroliya (Postgraduate Institute of Medical Education &

Research, Chandigarh, India); Vidyadhar B Bangal (Pravara Institute of Medical Sciences); Ashish Gupta, Lavanya Kannaiyan (Rainbow Children's Hospital); Aditya A Kulkarni (Ruby Hall Clinic); Bijnya B Panda (S.C.B. Medical College and Hospital); Abhishek Mittal (Safdarjung Hospital); Rahul J Ghodke, Sachin Y Kale, Sanjay Dhar (Sanjay Clinic & D Y Patil Hospital New Mumbai); Gaurav Agarwal, Anjali Mishra, Vijai Datta Upadhyaya, Basant Kumar (Sanjay Gandhi Postgraduate Institute Of Medical Sciences, Lucknow); Madhan Jeyaraman (Faculty of Medicine - Sri Lalithambigai Medical College and Hospital, Dr MGR Educational and Research Institute, Chennai, Tamil Nadu); Asif Mehraj, Fazlul Q Parray (Sher-i-Kashmir Institute of Medical Sciences); Shivang Gaurang Amin, Saptak P Mankad, Karan V Thakore, Riya Singh (Shree Krishna Hospital); Pankaj Kumar Garg (Shri Guru Ram Rai Institute of Medical and Health Sciences, Dehradun, India); Hardil P Majmudar, Tanishq S Sharma, Raghunandan Gorantlu Chowdappa (Shri Krishna Hospital and pramukhswami medical college); Sahiba S Maniar (Sir J. J. Group of Hospitals); Sumit Thakar (Sri Sathya Sai Institute of Higher Medical Sciences); Kavitha Jain (Sri Shankara Cancer Hospital and Research Centre); Tapan Patel (Baroda Medical College and SSG Hospital); Rahul A Gupta (Synergy Institute of Medical Sciences); Gaurav Aggarwal, Sujoy Gupta, Sanjit Kumar Agrawal, Abhishek Sharma, Prateek Jain, Anik Ghosh, Amrit Pipara (Tata Medical Center); C S Pramesh, Shraddha Patkar, Vijaya Prakash Patil, Jigeeshu V Divatia, Ajay Puri (Tata Memorial Hospital); Akshay Kumar, Rohit Bhardwaj, Abhishek Mittal (Vardhman Mahavir Medical College & Safdarjung Hospital); Sunil Kumar Venkatappa, Mallikarjuna Manangi (Victoria Hospital, Bangalore Medical College & Research Institute); Prashanth J Prabhu (Vydehi Institute of Medical Sciences and Research Center).

**Indonesia:** Sumadi L Anwar, Djayanti Sari (Central General Hospital Dr. Sardjito & Universitas Gadjah Mada); Aida R Tantri, Susilo Chandra, Sidharta K Manggala, Aino N Auerkari, Raihanita Zahra, Ratna F Soenarto, Andi A W Ramlan, Matthew Billy, Achmad K Harzif, Ilham Utama Surya; Mayang I Lestari (Mohammad Hoesin General Hospital & Universitas Sriwijaya), Zulkifli Zulkifli (Dr Mohammad Hoesin General Hospital); Fachreza A Damara (Dr. Hasan Sadikin Central General Hospital & Universitas Padjadjaran); Rozi A Aryananda (Dr. Soetomo General Academic Hospital); Yunus Kuntawi Aji (National Brain Center Hospital); Thirza Hadipranata (RSUD Ngimbang); Warren Lie (RSUD Sawerigading Palopo); Gabriele J Kembuan (RSUP Dr. Wahidin Sudirohusodo); Marilaeta Cindryani, Tjokorda Gde Agung Senapathi (Sanglah General Hospital); Christopher Ryalino (Udayana University Hospital).

**Iran (Islamic Republic of):** Elahe Hosseini, Alireza Hosseini, Pourya Medhati (Abu-Ali Sina Hospital Shiraz); Reza Erfanian, Mohammadreza Firouzifar, Mahtab Rabbani Anari, Shirin

Irani (Amir Alam Hospital); Fakher Rahim (Baghaei Hospital); Naser Yousefzadeh Kandevari (Baharloo hospital); Fatemeh Sheikholeslami Kabiri (Fatemiyeh Oral and Maxillofacial Surgery Center); Nima Najafian Motahaver (Forqani Hospital); Masoomeh Hosseinpour, Mohsen Rajati, Reza Assadi (Ghaem Teaching Hospital); Mohadeseh Haqgou (Imam Khomeini Complex Hospital); Seyed Amir Javadi, Faramarz Karimian (Imam Khomeini Hospital Complex(IKHC)); Mehdi Asadi (Imam Reza hospital); Narges Alizadeh (Izadi Hospital); Mohammad Heidari, Seyed Fakhreddin Hejazi, Narges Alizadeh (Kaamkaar Hospital); Vahid Bazyari (Namazi Hospital); Sayedali Ahmadi (Rasool-e-Akram Hospital); Hossein Yusefi (Shahid Beheshti Hospital); Mojtaba KA Attar, Leila Oryadi Zanjani, Mohammad Hossein Nabian, Seyed Reza Yahyazadeh (Shariati Hospital); Hassan Fatemi Manesh, Mohadeseh Sotudeh (Shohada Hospital); Hamed Akhavadegan, Seyyed Hossein Shafiei (Sina Hospital).

**Iraq:** Hogir I Aldawoody (Al Yarmuk Teaching hospital); Ahmed A Almusawi (Al-Fayhaa teaching Hospital); Ali Al-Isawi (Al-Hillah Teaching Hospital); Ahmed Basim Abed Al-Hajjaj (Al-Mawani Teaching hospital); Yasir A Zwain, Mohammed J Alwash, Najah R Hadi, Rasool Maala (Al-Sader Medical City); Aeshah Anwar Adil (Alkindy teaching hospital); Hashim Talib Hashim, Naseem W Al-Salihi (Baghdad Medical City); Fahad Majid Yaseen Al-hasani (Basra Teaching Hospital); Pakhshan A Rashed, Pakhshan A Muhamed (Baxshen hospital); Ahmed A Hilmi (Ibn Sina); Mohammed Musa A Akhtyare (Kirkuk General Hospital); Hashim T Hashim (Nasiriya heart center); Rand A Hussein (Zafaraniyah General Hospital).

**Ireland:** Lylas Aljohmani, Fiona E Crotty (Beacon Hospital); Jessie A Elliott, Mohsen Javadpour, Niall F Davis (Beaumont Hospital); James PC Ryan, Muiyiwa Aremu (Connolly Hospital Blanchardstown); Stephen J O'Brien, Benjamin Ngie Xiong Wong, Michelle Min Hsiao, Emmet Andrews (Cork University Hospital); Jacques Pretorius, Imran Azeem (Letterkenny University Hospital); Hilary Ikele (Mayo University Hospital); Claire M McCarthy, Fadi-Tamas Salameh, Donal B O'Connor, Clare O'Connor (Rotunda Hospital); Patrick Sheahan, Conor P Barry, Fergal G Kavanagh, Deirdre Callanan, Danielle L James (South Infirmary Victoria University Hospital); Cillian Clancy, Stefanie M Croghan (St James's Hospital); Thomas M Aherne, Aoife Kiernan (St Vincent's University Hospital), Cathy Monteith (St Vincent's University Hospital); Patrick W Owens, Ben Creavin, Hassan Mekki (Tallaght Hospital); Stewart R Walsh, Paul A Carroll, Ke En Oh, Aoife J Lowery (University Hospital Galway).

**Israel:** Miklosh Bala, Noam Shussman, Jonathan Abraham Demma, Gad Marom, Yuri Fishman (Hadassah Medical Center); Osnat Zmora, Limor Muallem Kalmovich (Shamir Medical Center); Nir Horesh, Roi Anteby (Sheba Medical Center).

**Italy:** Mario V Papa (AORN Caserta); Giulio Argenio (AOU Ruggi); Giulio Sozzi (ARNAS Civico Hospital); Chiara Amatucci (USL Umbria 1); Edoardo Segalini (ASST Crema); Giovanni Pesenti (Azienda Ospedaliera A. Manzoni - i Lecco); Alessandro Giani, Michele Mazzola, Pietro Maria Lombardi (ASST Grande Ospedale Metropolitano Niguarda); Alberto M Saibene, Nicolò M Mariani (ASST Santi Paolo e Carlo); Luca Zanin, Jacopo Andreuccetti, Federico Ferrari, Gian Luca Baiocchi (ASST Spedali Civili, Ospedale di Brescia); Alice Frontali, Stefano Granieri, Christian Cotsoglou (ASST Brianza); Marco Scarpa, Roberto Colasanti, Donatella Schiavone (Azienda Ospedale Università di Padova); Antonio Castaldi, Carmine Antropoli (Azienda Ospedaliera Di Rilievo Nazionale Antonio Cardarelli); Gabriele Colò (Azienda Ospedaliera Nazionale Santi Antonio e Biagio e Cesare Arrigo); Irene Fiume (Azienda Ospedaliera Ospedali Riuniti Marche Nord); Gaetano Poillucci (Azienda Ospedaliera San Camillo - Forlanini); Laura Fortuna, Luca G Locatello, Oreste Gallo, Giandomenico Maggiore, Andrea Bottari, Chiara Bruno, Giuseppe Barbato, Annamaria Di Bella, Antonio Taddei (Azienda Ospedaliero Universitaria Careggi); Matteo De Pastena, Tommaso Campagnaro, Giuseppe Malleo, Salvatore Paiella, Alberto Balduzzi (Azienda Ospedaliera Universitaria Integrata di Verona); Vito Andrea Capozzi, Alessandro Carretta, Giacomo Bertolini, Giorgio Dalmonte, Mario Giuffrida (Azienda Ospedaliero - Universitaria di Parma); Valeria Andriola, Gennaro Martines, Arcangelo Picciariello (Azienda Ospedaliero Universitaria Consorziata Policlinico Di Bari); Gianmaria Casoni Pattacini, Mattia Di Bartolomeo, Alexandre Anesi (Azienda Ospedaliero Universitaria di Modena); Herald Nikaj, Sergio Gentilli, Elisa Reitano (Azienda Ospedaliero Universitaria Maggiore della Carità); Giacomo Fiacchini, Gregorio Di Franco, Luca Morelli, Lorenzo Andreani, Dario Tartaglia, Riccardo Balestri, Federico Coccolini, Massimo Chiarugi, Marco Puccini (Azienda Ospedaliero Universitaria Pisana); Daniele Fusario, Osvaldo Carpineto Samorani, Luigi Marano, Ludovico Carbone, Franco Roviello, Valeria Restaino, Anna Lisa Pesce, Luca Resca, Luigi Marano, Stefania Angela Piccioni (Azienda Ospedaliero Universitaria Senese); Massimiliano Veroux, Giuseppe Sarpietro, Maria Grazia Matarazzo, Antonio Cianci (Azienda Ospedaliero - Universitaria Policlinico San Marco); Andrea Morini, Maurizio Zizzo, Valentina Mastrofilippo, Vincenzo Dario Mandato, Lorenzo Aguzzoli, Jlenia Sarnari, Gabriela E Nita (Azienda Unità Sanitaria Locale - IRCCS di Reggio Emilia); Nicolò Fabbri, Michele Rubbini (Azienda Unità Sanitaria Locale di Ferrara); Roberta Tutino ("Cà Foncello" Treviso Regional Hospital); Mauro Podda, Gian Luigi Canu, Enrico Peiretti (Cagliari University Hospital); Sokol Trungu (Cardinale G Panico Hospital); Mario D'Oria (University

Hospital of Trieste ASUGI); Andrea Lauretta (Centro di Riferimento Oncologico di Aviano (CRO) IRCCS); Matteo Marro, Francesco Guerrera, Mauro Santarelli, Stefano Salizzoni, Oreste Iocca (Città della Salute e della Scienza Hospital, University of Torino); Pasquale Di Maio (Giuseppe Fornaroli Hospital, ASST-Ovest-Milanese, Magenta-Milan); Teresa Perra, Alberto Porcu, Antonio M Scanu (Cliniche San Pietro, A.O.U. Sassari); Giovanni Pirozzolo (Dell'Angelo Hospital, Venezia); Francesca Toia, Ettore Dinoto, Emanuele Cammarata, Mara Franza, Fernando Rosatti, Calogero Cipolla, Natalia Di Grazia, Walter R Milia, Felice Pecoraro (Department of Surgical, Oncological and Oral Sciences. University of Palermo); Edoardo Virgilio (di Vaio Hospital); Andrea Barberis (E.O. Ospedali Galliera); Fabrizio Bàmбина, Laura Lavalle (Fabrizio Spaziani Hospital -Frosinone); Giovanni Sinibaldi (Fatebenefratelli Isola Tiberina); Leo Licari (FBF Buccheri La Ferla Palermo); Francesca P Tropeano, Gaetano Luglio, Gianluca Pagano, Francesca Paola Tropeano, Roberto Peltrini, Maria Michela Di Nuzzo, Umberto Bracale (Federico II University of Naples); Alice Indini (Unit of Medical Oncology, Ospedale di Circolo e Fondazione Macchi, ASST Settelaghi, Varese, Italy); Daniele Bissacco, Maurizio Domanin, Sara Torretta (Fondazione IRCCS Ca' Granda Ospedale Maggiore Policlinico, Milano); Giorgio Bogani, Fabio Martinelli, Laura Sala, Umberto Cortinovis, Valeria Zingarello, Francesca Bertolina (Fondazione IRCCS Istituto Nazionale dei Tumori, Milano); Moh'd Abu Hilal (Fondazione Poliambulanza); Pietro Fransvea, Angelo A Marra, Fausto Rosa, Francesco Litta, Carlo Ratto, Angelo Parello, Silvia Tedesco, Federica Ferracci, Sara Pitoni, Sabatino D'Archi, Gianluca Franceschini, Lorenzo Scardina (Fondazione Policlinico Universitario A Gemelli IRCCS, Rome, Università Cattolica del Sacro Cuore); Gianpiero Gravante (Francesco Ferrari Hospital); Luigi Conti, Edoardo Baldini, Pietro Maniscalco, Corrado Ciatti (Ospedale G. Da Saliceto, Piacenza); Giuseppe Spriano, Giuseppe Mercante, Francesca Gaino, Flavio Milana, Antonino Spinelli, Fabio Ferreli, Armando De Virgilio, Matteo Di Bari (Humanitas University & IRCCS Humanitas Research Hospital); Fabrizio Aquilino, Fabio Marino (IRCCS 'Saverio de Bellis'); Raul Pellini, Flaminia Campo, Silvia Moretto, Francesco Mazzola, Gerardo Petruzzi, Riccardo Mastroianni, Giuseppe Simone, Gerardo Petruzzi (IRCCS "Regina Elena" National Cancer Institute); Matteo Rottoli, Iris S Russo, Diego Raimondo, Ignacio J. Fernandez, Antonio Raffone, Pietro Bertoglio, Matteo Ravaioli, Giuliana Germinario, Paolo Bernante, Paolo Casadio, Renato Seracchioli, Matteo Droghetti, Riccardo Schiavina, Francesco Ricotta, Achille Tarsitano, Alessandro Arena, Anna Nunzia Della Gatta, Tommaso Violante, Alice Pellegrini, Federico Bolognesi, Piergiorgio Solli, Sara Ricciardi, Alessandro Cipolli, Manuela Maletta, Manuela Maletta, Marilina La Porta, Maria Paola Lauretta, Rita M Melotti, Achille Tarsitano, Niccolò Daddi, Sergio Nicola Forti Parri, Elena Garelli, Anna M Perrone , Raffaele Lombardi, Valentina Pinto, Marco Pignatti, Valeria Tonini (IRCCS Azienda Ospedaliero-Universitaria di Bologna); Chiara Copelli, Antonio Nicola Giordano, Vincenzo

Palai (IRCCS Casa Sollievo della Sofferenza); Raffaele Aspide, Emanuele La Corte (IRCCS Istituto delle Scienze Neurologiche di Bologna); Stefano Lucchini, Francesco Castagnini, Francesco Pardo, Michele Di Liddo, Filippo Caternicchia, Danilo Donati, Bruno Cavalieri, Tommaso Frisoni, Marco Rotini (IRCCS Istituto Ortopedico Rizzoli); Stefano Scabini, Aldo Vagge, Lorenzo Ferro Desideri, Fabio Barra, Marco Sparavigna, Piero Fregatti, Andrea-Pierre Luzzi, Sergio Costantini, Simone Ferrero, Claudio Gustavino, Marco Paratore, Umberto Perrone, Maria Grazia Centurioni, Franco Alessandri, Antonella Ferraiolo, Francesco Paolo Rosato, Lorenzo Ball (IRCCS Ospedale Policlinico San Martino); Francesca Ascari, Giuliano Barugola (IRCCS Ospedale Sacro Cuore Don Calabria); Andrea Lovece, Pamela Milito, Stefano Siboni, Luigi Bonavina (IRCCS Policlinico San Donato); Alberto Aiolfi, Davide Bona, Giancarlo Micheletto (Istituto Clinico Sant'Ambrogio); Luca Bertolaccini, Giulia Sedda, Lorenzo Spaggiari, Marta Tagliabue, Rita De Berardinis, Giacomo Pietrobon, Francesco Chu, Mohssen reAnsarin, Annalisa Garbi (IEO, European Institute of Oncology IRCCS, Milano); Renato Patrone, Andrea Belli (Istituto Nazionale Tumori Fondazione G.Pascale, IRCCS); Pasquale Cianci (Lorenzo Bonomo Hospital); Ivano Raimondo (Mater Olbia Hospital); Annamaria Ferrero (Mauriziano Hospital, Torino); Carlo Alberto Pacilio, Antonio Bocchino, Leonardo Solaini, Fabrizio D'Acapito, Barbara Di Stefano, Ruggero M Corso (Morgagni-Pierantoni Hospital, Forli); Francesco Pata, Mariarosaria Vitale, Giuseppe Rotunno (Nicola Giannettasio Hospital); Riccardo Lenzi (Ospedale Apuane, Massa); Ernesto Migliorino (Ospedale Bellaria); Ugo Grossi, Simone Novello, Maurizio Romano, Serena Rossi, Giacomo Zanus (Ospedale Ca' Foncello, Treviso - Università di Padova (DISCOG)); Angelo G Epifani (Ospedale Città di Sesto San Giovanni); Alessandro Broglia, Matteo Santoliquido (Ospedale Civile di Voghera); Marco Clementi (Ospedale Civile San Salvatore, University of L'Aquila); Chiara Marafante (Ospedale degli Infermi di Rivoli); Francesco Maria Carrano (Busto Arsizio Circolo Hospital, ASST- Valle Olona, Varese); Renato Patrone (Ospedale di Eboli "Maria SS. Addolorata"); Francesco Fleres, Guglielmo Clarizia (ASST Valtellina e Alto Lario, Sondrio Hospital - Sondrio Italy); Guido Coretti (Ospedale Fatebenefratelli); Luca Ferrario, Claudio Guerci, Anna Maffioli (Ospedale Luigi Sacco Milano); Marcello D'Andrea, Nicola Zanini, Riccardo Bertelli, Carlo Vallicelli, Fausto Catena (Ospedale M. Bufalini); Gian Marco Prucher, Alfredo Conti (Ospedale Maggiore/Bellaria Carlo Alberto Pizzardi AUSL Bologna); Gianluigi Moretto, Marco Inama (Ospedale Pederzoli); Manuela Grivon (Ospedale Regionale Umberto Parini); Daniele Sambucci (Ospedale Sacra Famiglia Fatebenefratelli); Giacomo M Pirola, Marilena Gubbiotti (Ospedale San Donato USL Toscana Sud Est); Andrea Sagnotta (Ospedale San Filippo Neri); Sara Ornaghi, Robert Fruscio, Nicolò Tamini, Marco Ceresoli, Luca Gianotti (Ospedale San Gerardo and Milano-Bicocca University, Monza); Fabrizio Masciello, Tommaso Nelli, Giuseppe Canonico, Alessandro Anastasi (Ospedale San Giovanni di Dio);



Michele Malerba (Ospedale Santa Corona, Pietra Ligure (SV)); Emmanuele Abate (Ospedale Vittorio Emanuele III - Carate Brianza); Vincenzo Lizzi, Antonio L. Sarni, Nicola Tartaglia, Marco Montagna (Ospedali Riuniti Azienda Ospedaliera Universitaria Foggia); Stefano D'Ugo, Norma Depalma, Marcello Spampinato ("Vito Fazzi" Hospital, Lecce); Paolo Pizzini, Stefano Magnone, Paolo Pizzini (Papa Giovanni XXIII Hospital); Marcello Migliore, Alessio Volpicelli, Rossella Gioco (Policlinic University Hospital "G. Rodolico", Catania); Giorgio Ivan Russo (Urology Section, University of Catania); Antonio Bozzani, Lorenzo Cobianchi, Francesca Calabretto (Fondazione IRCCS Policlinico San Matteo, Pavia); Enrico Pinotti (Policlinico San Pietro); Mirko Barone (Policlinico Santissima Annunziata); Michela Campanelli, Giulia Bagagli, Leandro Siragusa, Luca Orecchia, Marzia Franceschilli, Roberta Angelico, Bruno Sensi, Tommaso M Manzia, Lorenzo Petagna, Giulia Bacchiocchi, Giuseppe S Sica (Policlinico Tor Vergata Hospital, Rome); Pierfrancesco Lapolla, Andrea Picchetto, Placido Bruzzaniti, Giovanni Marruzzo, Antonio V Sterpetti, Andrea Mingoli, Paolo Sapienza, Anthony Kevin Scafa, Giuseppa Zancana, Gioia Brachini, Diego Ribuffo, Bruno Cirillo, Simona Meneghini, Pierfranco M Cicerchia, Martina Zambon, Vito D'Andrea, Alessia D'Amico, Pietro Familiari, Andrea Cassoni, Resi Pucci, Francesca De Felice (Policlinico Umberto I, Sapienza University of Rome); Giuseppe Pascarella, Alessandro Strumia, Alessandro Coppola, Biagio Zampogna, Rocco Papalia, Gabriella T Capolupo, Marco Caricato, Antonio Nenna, Carmelo Dominici (Policlinico Fondazione Campus Bio-Medico di Roma); Maria Caffo, Giorgio Badessi, Carmelo Mazzeo, Gerardo Caruso (Policlinico Universitario G. Martino of Messina); Gabriele Bellio (Ospedale di Piove di Sacco); Eleonora Guaitoli (Presidio Ospedaliero Valle d'Itria); Roberto Rimonda, Federico Fusini (Regina Montis Regalis Hospital, Mondovi); Marco Giacometti (San Biagio Hospital, Domodossola - VB); Caterina Baldi, Francesco Ferrara (San Carlo Borromeo Hospital, ASST Santi Paolo e Carlo, Milan); Antonella Chessa (San Giovanni di Dio); Giulio Accarino (San Giovanni di Dio e Ruggi d'Aragona); Michela Monteleone, Carlo Riva, Arianna Balconi, Marko Markovic, Gisella Barone, Andrea Locatelli, Simone Olmetti, Andrea Costanzi (Ospedale San Leopoldo Mandic, Merate, ASST Lecco); Matteo Uccelli (San Marco Hospital GSD); Raffaele Galleano (Ospedale San Paolo Savona); Andrea Balla, Antonio De Carlo (Hospital "San Paolo"); Andrea Pisani Ceretti (San Paolo Hospital, University of Milan); Luca Bertoglio, Alessandro Grandi, Luca Apruzzi, Andrea Melloni, Michael Spartalis, Alfio Spina, Paola De Nardi, Giulia Bonavina, Massimo Candiani, Martina Piloni, Gianluca Nocera, Filippo Gagliardi, Stefano Turi (San Raffaele Scientific Institute, Milan); Cosimo De Nunzio, Niccolò Petrucciani, Silvia Fiorelli, Giovanni G Laracca, Cecilia Menna (Sant'Andrea Hospital, Sapienza University of Rome); Giorgio Lisi (Sant'Eugenio Hospital); Alberto Brolese, Francesco A Ciarleglio, (Santa Chiara Hospital); Diego Sasia, Giorgio Girauda, Valentina Testa, Maria Carmela Giuffrida, Roberto Chiarpenello, Ettore Dalmaso, Desiree

Cianflocca (Santa Croce e Carle Hospital, Cuneo); Giacomo Calini (Santa Maria della Misericordia, University Hospital of Udine); Nicola Cillara (Santissima Trinità - ATS Sardegna); Giulia Armatura (Central Hospital of Bolzano, Azienda Ospedaliera dell'Alto Adige); Luca Turati (Treviglio Hospital); Gianluca Pellino, Maria Paola Menna, Claudio Iovino, Settimio Rossi, Francesca Simonelli (Università della Campania 'Luigi Vanvitelli', Naples); Domenico Baccellieri, Massimo Candiani, Lorenzo Gozzini, Ugo Elmore, Riccardo Rosati (Università Vita-Salute San Raffaele); Gaetano Gallo, Giuseppe Giannaccare, Maria G Cristofaro, Ida Barca, Adriano Carnevali (University 'Magna Graecia' of Catanzaro); Giuseppe Consorti (Azienda Ospedaliera Universitaria Ospedali Riuniti, Ancona); Antonio Simone Laganà (ARNAS "Civico – Di Cristina – Benfratelli", University of Palermo), Salomone Di Saverio, Matteo Desio, Mattia Berselli, Giuseppe Ietto (University of Insubria, Ospedale di Circolo e Fondazione Macchi (Varese)); Alex Pontini, Renato Salvador (University of Padova); Francesco Di Marzo (Valtiberina); Giulia Turri (Verona University Hospital Trust).

**Japan:** Junichi Saito (Hirosaki University Hospital); Tsukasa Kochiyama (Juntendo University Hospital); Sohei Satoi, Daisuke Hashimoto (Kansai Medical University); Kazuhiko Yoshimatsu (Kawasaki Medical School Hospital); Tsutomu Namikawa (Kochi Medical School Hospital); Akira Kuriyama (Kurashiki Central Hospital); Eiji Sunami (Kyorin University Hospital); aChikashi Takeda (Kyoto University Hospital); Masaki Shiota (Kyushu University); Satoshi Toyama (Medical Hospital of Tokyo Medical and Dental University); Makoto Ishitobi (Mie University Hospital); Yosuke Kawasaki (Mitsui Memorial Hospital); Masahiko Kawaguchi, Mitsuru Ida (Nara Medical University); Masae Iwasaki, Hiroshi Mase (Nippon Medical School Hospital); Yuki Fujimoto (Saitama Children's Medical Center); Tomohiro Chaki, Shunsuke Tachibana, Satoshi Kazuma (Sapporo Medical University Hospital); Naoto Kuroda (Seirei Hamamatsu General Hospital); Yuka Matsuki (University of Fukui); Kota Kamizato, Kota Kamizato (University the Ryukyus Hospital).

**Jordan:** Rand Y. Omari (Abdali Hospital); Mohammad Ahmad Jamil Es Salim (Al-Nadeem hospital); Zaid Alwarawrah, Salameh A AAbdulrahmanlarood (Al Karak Hospital); Adnan R Alnaser, Radi Tofaha Alhuseini , Abdulrahman G Qasem, Ahmad M Eid, Mohammad A Theab, Ibrahim Ghayada, Ali Guboug , Mohannad Fayiz Alqedrh, Mohammed E Al-banna, Amro Abuleil, Yaqin mahmoud asassfeh, Zaid Mohammed Al-sheikh ali, Ahmad Ayman Eid, Reem G AbuSalah, Reem G AbuSalah, Raid George Hijazeen (Al-Bashir Hospital); Sajeda Awadi (Dr. Jameel Tutanji Hospital); Omar S Mansour (Ibn Al Haitham Hospital); Almu'atasim Khamees (Irbid Specialty Hospital); Bourhan Alrayes, Mohammad Hassan, Mahmoud W M Qandeel , Zainab O Ibrahim, Mohammad Maher Salah Salah, Hazem Zuhair Alnatour (Islamic Hospital); Ma'moun Helmi Suleiman Saleh (Istiklal

Hospital); Haya H Suradi (Istishari Hospital); Hashem A Abu Serhan , Faris Jamal Abu Za'nouneh, Hazim R Alheji, Khayry Al-Shami , Ala'a Al-deen T Mousa, Isam K Bsisu, Rasha Bsisu, Mohammad I A Abuzenah, Zeina H. Kalaji, Samir Jabaiti (Jordan University Hospital); Haya A. Omeish, Aseel Y Almuhtaseb, Amro M Abuleil, ( Jordanian Royal Medical Services); Reem A Theab, Anagheem A Sheyyab, Shadi Hamouri, Hazim S Ababneh, Zouhair Amarin, Mohammad Yasin Bahhour, Marah K Abu-Mehsen, Mohammed Abdullah Al-howthi, Omar S S Wafi, Taher Rashed Mohammed Sawadi, Iyad S Albustami, Maen O Masadeh, Ahmad Al Khassawneh (King Abdullah University Hospital/ Jordan University of Science and Technology); Justin Z Amarin, Sara S Irshaidat, Mohamad K. Abou Chaar, Louay Y Zaghlol, Razan Mansour, Mohammed Shahait (King Hussein Cancer Center); Haitham Qandeel, Abd Almonem B. (Shaikh Ahmad) , Maen O Masadeh (Prince Hamza hospital); Lubna Hawasly, Ghalia Alsabbagh, Tawfik Mohammed Al-Dabaa, Qaed Mashhour Bani Amer (Princess Basma Hospital); Luai Abu-Ismail (The Speciality Hospital); Dua'a M Shaout, Tariq H Abu-shadouf (Zarqa New Governmental Hospital).

**Kazakhstan:** Raikhan Bolatbekova (Almaty Oncology Centre); Nadir Issayev (Center of Children's Emergency Medical Care of Almaty); Mukhtar B Kulimbet, Almaz M Kiyabayev, Dinara Ospanova (City Cardiology Center); Dauren Zhumatayev , Abylai Baimakhanov (City Clinical Hospital No. 4); Ildar Fakhradiyev, Shynar Tanabayeva, Timur Saliev (Karasay Central District Hospital); Dilyara Kaidarova (Kazakh Institute of Oncology and Radiology).

**Kenya:** Beverly Cheserem (Aga Khan University Hospital Nairobi); Intisar H. S. Hamdun , Aziz Z Munubi (Kenyatta National Hospital); Mark M W Siboe (Avenue Hospital, AAR Hospital, Mt. Kenya University); Samuel Wanjara Wachera (Nakuru Level V Hospital); Robert K Parker, Michael M Mwachiro (Tenwek Hospital); Victor Pendaeli Mwangi (Thika Level 5 Hospital).

**Kuwait:** Yaqoub M Jafar (Iben Sina hospital); Tariq F. Al-Shaiji (Jaber Al Ahmad Al Sabah Hospital).

**Latvia:** Andrejs Pčolkins (Latvian Center of Oncology); Ingus A Apse, Hemant D Sheth (Pauls Stradins Clinical University Hospital); Jānis Pāvulāns (Riga East Clinical University Hospital).

**Lebanon:** Samar Karout, Imadeddine Ahmad Farfour (Al Zahraa Hospital University Medical Center); Ali O Safar(Hammoud Hospital UMC); Anthony Lichaa, Salim H Ismail

(Hotel Dieu De France); Mohamad B. Kassab, Hussein Abou-Abbass (Makassed General Hospital); Rabih F Awad, Hadi El Assaad (Nini Hospital); Fatima Ghazi Serhan (Rafik Hariri University Hospital); Lina Karout (Rayak Hospital); Anisa Chowdhary (Saida Governmental Hospital); Rania Itani (Saint George Hospital University Medical Center).

**Libya:** Ali A A Abu Hamrah, Almoataz Bellah , Nassib S Algatanesh , Mousab A Duwebi, Esraa T Alkoubra (Abu Saleem Trauma Hospital); Hala M Algehani (Ajdabiya Almagreif Hospital); Monther Alsharif, Faraj S Al-maadany, Fatimah S Elkhafeefi, Ahmad M Buimsaedah, Sarah M Ghazal (Al-jalaa Teaching/Trauma Hospital); Mohamed G. Amnaina (Al-Wahda Hospital); Ghozlan Y Yagoub (Alhikma hospital); Hana Ramadan bin yahia, Elham Hussin Bareig (Aljala Maternity Hospital); Bahaeddin BenHamida, Nayrouz Alkimeeshi , Malak Marwan, Nawal Aldokali Muhammed, Eman M. Benamer, Rema H Othman, Ahmed A Momen (Alkhadra Hospital); Kusay A Ayad, Nawal Aldokali (Alkhalil Hospital); Alsosy Abdullah Khalefa Mohammed (Almarj Teaching Hospital); Enas F Sanousi, Saed J Aboubakr , Islam F Aboubakr (Althawra Hospital Albyda); Amal Alttaira , Sara A Benatiga, Ilham A Alteerah, Wafa Aldressi, Marwa O Elhwety, Mohamed Fathi Kalifa, Maram A Glessa, Taha Abubaker, Hassan A Shembesh, (Benghazi Medical Center); Arowa Alansari (Ghadames General Hospital); Akram M Alkaseek (Gharyan Central Hospital); Malek Mohamed Abusannuga, Mohammed A Alawami (Medical Care Clinic); Fras Ammar Elhajdawe (Metiga Hospital); Aihab Salem Benamwor, Husayn M Aween (Misrata Central Hospital); Eslam Kriem, Rayet Al Islam Benjouira (National Heart Centre, Tajoura Heart Center Hospital); Sana Moussa Shagour, Hajar Alamin Ali, Ahmed I Awrayit, Salmin Ibrahim Matoug , Rema Ibrahim Abdesalam, Ikhlas M. Ouakouak (Sabha Medical Center); Ali H Aldarrajji (Sabratha Teaching Hospital); Ameerah Faraj Elmahdi, Zinelabedin Mohamed (Tobruk Medical Center); Samera M Khan, Ahmed A Gerwash, Mohammed Khayri Aboubeirah, Nosaiba Jalal Drera, Marwa A Sinan, Ekram Abdulhamid Abujrad, Marwa Biala, Doaa A Gidiem, Sarah A Aljamal, Marwa Biala, Sarah A Aljamal, Esmail M Hamuda, Hussamuddin Abusaa Manhus, Muhannud Hassan Binnawara (Tripoli Central Hospital); Muhammed Elhadi, Ahmed A Msherghi , Mohamed Ajala , Nadia D Shetty, Sanad S Kanna, Mohamed H Said, Mohamed M Elghazal,, Moaz Mustafa Alwarfalli, Mohamed A Alharari , Eslam Etayeb, Anwaar M Abozid, Kariman Rdadi, Tariq Alferis, Ibrahim A Ellojli, Muad F Abuhallalah (Tripoli Medical Center/ Tripoli University Hospital); Alhadi M. Jahan (Zahravi Hospital); Abdulmueti Alhadi, Mohammed Abdunaser dra, Nadia M Abdalhamed (Zawia Teaching Hospital); Ismail A Saleh (Zintan Teaching Hospital); Bashir Abobaker Albakosh (Zliten Medical Center); Najat Ben Hasan, Salema S Bin Wali, Hayat Ben Hasan, Hana B Yahya (Zliten Teaching Hospital).

**Lithuania:** Marijus Ambrazevicius (Klaipeda Republic Hospital); Narimantas E Samalavicius (Klaipeda University Hospital); Donatas Venskutonis, Albertas Dauksa, Zilvinas Dambrauskas, Rita Gudaityte (Lithuanian University of Health Sciences Kaunas Clinics); Audrius Dulskas, Gediminas Januška (National Cancer Institute); Kestutis Strupas, Tomas Poskus, Aiste Gulla (Vilnius University Hospital).

**Madagascar:** Rebecca Caruana (Mater Dei Hospital).

**Malawi:** Parth K Patel (Kamuzu Central Hospital).

**Malaysia:** Ernest CW Ong (Bintulu Hospital); Sarfraz Ahmed (Universiti Sains Malaysia Hospital); Ahmad Ramzi Yusoff, Bahiyah Abdullah, Mohd Fairudz Mohd Miswan (Faculty of Medicine, Universiti Teknologi MARA); Sui-Weng Wong, Ruhi Fadzlyana Jailani (Hospital Ampang and Universiti Sains Islam Malaysia); Nor A Hakim (Hospital Kuala Lumpur); Hizami Amin Tai, Lee Fei Yee, Ahmad S Yahaya, Nik Q Fathi (Hospital Pengajar Universiti Putra Malaysia); Kelvin Voon, Wei Pin Hung (Hospital Pulau Pinang / Penang Medical College); Ruzaimie Noor (Hospital Raja Perempuan Zainab II); Syahrul Anuar Salleh (Hospital Seberang Jaya); Muhamad Izwan Ismail, Tan Jih Huei (Sultanah Aminah Hospital); Rosnelifaizur bin Ramely, Andee Dzulkarnaen Zakaria, Ikhwan Sani Mohamad, Mohd Nizam Md Hashim, Mohamed Shafi MahboobAli (Hospital Universiti Sains Malaysia); Norhafiza Ab. Rahman, Ahmad Faizal Othman, Mat Salleh Sarif (International Islamic University Malaysia Medical Centre); Feng Yih Chai (Jesselton Medical Centre); Lim See Liang (Malacca General Hospital); Razrim Rahim (Port Dickson Hospital); Sentilnathan Subramaniam, Jin-Jiun Mah, Firdaus Hayati (Queen Elizabeth Hospital and Universiti Malaysia Sabah); Aini Fahriza Ibrahim (Sarawak General Hospital); Yew Chor Kuan (Selayang Hospital); Hans A Mahendran (Sultanah Aminah Hospital); Abd Jabar Nazimi, Farrah Hani Imran, Roszalina Ramli, Norshamsiah M Din, Tang Seng Fai, Syed Nabil, Mae-Lynn C Bastion, Ian Chik (Universiti Kebangsaan Malaysia Medical Centre); Shireen A Nah, Sivakumar Krishnasamy, April C Roslani, Peng Soon Koh, Li Ying Teoh, Mee-Hoong See, WeiJin Wong, Yew Toong Liew, Ahmad N Fadzli (University Malaya Medical Centre); Atif Amin Baig (Universiti Sultan Zainal Abidin).

**Malta:** Francesca Chircop, Kurt Lee Chircop, Josephine Psaila (Mater Dei Hospital).

**Mexico:** Guillermo Yanowsky-Reyes, Jaime Orozco-Perez, Rafael Santana-Ortiz, Laura G Peña-Balboa, Sergio A Trujillo-Ponce (Antiguo Hospital Civil de Guadalajara); Raúl A.

Miranda (Centro Médico ISSEMyM Toluca); Luis A Lara (Centro Médico Nacional 20 de Noviembre); Jose-Luis Beristain-Hernandez (Centro Médico Nacional La Raza); Juan Roberto Torres Cisneros (Hospital Angeles Lindavista); Sonia López, Ricardo Arceo-Olaiz, Ernesto Anaya, Francisco J Ochoa C, Bernardo J Gutierrez-Sougarret (Hospital Angeles Pedregal); Christian E Soulé-Martínez, Arianne I Lupián-Angulo (Hospital Central Norte Pemex); Enrique A Sanchez-Valdivieso (Hospital de Alta Especialidad de Veracruz); Mónica Noguez-Castillo,, Doriela Herappe Mellado (Hospital de Especialidades del Niño y la Mujer); Roberto A Núñez González, José A Ortega Jiménez (Hospital de especialidades Puebla CMN Gral. de Div. Manuel Ávila Camacho); José V. Pérez-Navarro, Alejandro González-Ojeda, Francisco J. Barbosa-Camacho, Paola Flores-Becerril, Isaac Esparza-Estrada, Jose A. Guzman-Barba , Emilio A. Reyes-Elizalde, Aldo Bernal-Hernandez, Juan C. Ibarrola-Peña, Ruben E. Moran-Galaviz, Luis R. Pacheco-Vallejo, Bertha G. Guzmán-Ramírez, Guadalupe Castillo-Cardiel, Luis R. Ramirez-González, Luis H. Govea-Camacho (Hospital de Especialidades, CMNO-IMSS); Antonio Ramos-De la Medina (Hospital Español Veracruz); Mario Trejo-Avila (Hospital General Dr. Manuel Gea González); Erik E. Sosa Duran, Victor M. Pinto Angulo (Hospital Juárez de México); Victor Visag-Castillo, Angélica A. Soto-Carvajal (Hospital Médica Sur); Aldo F Izaguirre (Hospital Medica Universidad); Gustavo Martinez-Mier, Luis Hernández Miguelena (Hospital Regional de Alta Especialidad de Veracruz); Edgard Efrén Lozada Hernandez (Hospital Regional e Alta Especialidad del Bajío); Francisco Cesar Becerra García (Hospital San Angel Inn Patriotismo); Javier Melchor-Ruan (Instituto Nacional de Cancerología); Noel Salgado-Nesme, Daniel Garay-Lechuga, Omar Vergara-Fernandez (Instituto Nacional de Ciencias Médicas y Nutrición "Salvador Zubirán"); Gabriela Ambriz-González (Unidad Médica de Alta Especialidad Hospital de Pediatría, CMNO-IMSS)Clotilde Fuentes Orozco (Hospital de Especialidades CMNO-IMSS); Alberto N. Peón, Alejandro Durán-Méndez, Eduardo N Ortega, Daniela Pérez (Sociedad Española de Beneficencia); Gustavo Salgado-Garza, H. Alejandro Rodriguez (Hospital Zambrano Hellion).

**Moldova (the Republic of):** Gheorghe A Rojnoveanu, Marin G Vozian, Radu I Gurghis (Institute of Emergency Medicine); Petru Caraja (Repromed +).

**Mongolia:** Sarnai Erdene, Erdene Sandag, Soyombo Orsoo, Sergelen Orgoi (Mongolian National University of Medical Sciences).

**Morocco:** Asmae Kinany, Youness Bakali (University Hospital of Rabat); Slaoui Aziz (Centre Hospitalier Universitaire Ibn Sina Rabat); Walid Bijou (Centre Hospitalier Universitaire Ibn Rochd); Hasnae Guechati (Centre Hospitalier Universitaire Oujda)

Mohammed VI); Lina Boualila, Bouanani Othmane, Taha I Sefrioui, Rajaa B El Azzouzi, Mohammed Yassaad Oudrhiri, Hajar Bechri (Hospital of Specialties - ONO); Abdelghafour Elkoundi (Hôpital Militaire Mohammed V); Amine Souadka, Amine Benkabbou, Mohammed Anass Majbar, Nezha ElBahaoui, Raouf Mohsine, Ghita El Mohafide, Brahim El Ahmadi, Abdelilah Ghannam, Zakaria Houssain Belkhadir (National Institute of Oncology, Mohammed V University, Rabat)

**Nepal:** Anadi Khatri (Birat Anka Aaspatal); Prashant Tripathi (TU Teaching Hospital); Subarna Bhusal, Sunil Munakomi (College of Medical Sciences, Chitwan).

**Netherlands (the):** Frank W Bloemers, Roel Bakx, Mark I van Berge Henegouwen, Suzanne S Gisbertz (Amsterdam UMC, University of Amsterdam); Ben FJ Goudsmit (Leiden University Medical Center); Wouter KG Leclercq, Louisa N Spaans (Máxima Medical Center); Niels J Harlaar (Rode Kruis Ziekenhuis); Schelto Kruijff (University Medical Center Groningen); Gabriela A Sansoni, Netanja I Harlianto (University Medical Center Utrecht); Joop L Konsten (VieCuri Medisch Centrum); Frank C den Boer, Nicole AM Dekker, Nicole AM Dekker (Zaans Medisch Centrum); Donald Schweitzer, Donald Schweitzer (Zuyderland Medical Centre).

**New Zealand:** Michael JJ Chu, Natalie Allen, Jim Hsu-Shun Wang (Auckland City Hospital); Oliver Lyons, Fiona J Carey (Christchurch Hospital); Deborah M Wright (Dunedin Hospital); Nicholas J Lightfoot, Tiffany C Oliver (Middlemore Hospital); Daniel D Wen (North Shore Hospital); Vidit Singh (Palmerston North Hospital); David C Kieser (Southern Cross Hospital); Nichola C Wilson (Starship Children's Hospital); Chris Varghese (Waikato Hospital); Paul V B Fagan (Wellington Regional Hospital); Matthew James McGuinness, Christopher Harmston (Whangarei Hospital).

**Nicaragua:** Néstor Javier Pavón Gómez (Amistad Japon Nicaragua).

**Niger (the):** Harissou Adamou (Hôpital National de Zinder, Université de Zinder).

**Nigeria:** Abdullahi M. Kirfi, Dr Mohammed M Abdull, Auwal Adamu, Haruna U Liman, Bello Shahir Umar (Abubakar Tafawa Balewa University Teaching Hospital Bauchi); Ademola Adeyeye, Oghenekaro S Ifoto, Akinola Akinmade (Afe Babalola University Multi-System Hospital); Keffi Mubarak Musa, Nasir Oyelowo, Musliu Adetola Tolani, Tunde Talib Sholadoye, Alfa Yakubu, Okeoghene M Ajagha, Lovely Fidelis, Oluseyi O Ogunsua, Muhammad Daniyan (Ahmadu Bello University Teaching Hospital); Jameel I Ahmad,

Ibrahim U Garzali, Musbahu S Kurawa, Mohammad A Mohammad, Sadiq Hassan, Saminu Muhammad, Lawal B. Abdullah, Idris U Takai, Mohammed S. Aliyu, Saudat G. Habib, Misbahu H Ahmad, Sani A. Aji, Abdulrazak Ajiya (Aminu Kano Teaching Hospital); Collins C Adumah, Omotayo F. Salami (Babcock University Teaching Hospital); Amina Mohammed-Durosinlorun, Stephen Akau Kache, Matthew C Taingson, Joel Amwe Adze (Barau Dikko Teaching Hospital); Olajide O Abiola (Bowen University Teaching Hospital); Julius G Olaogun, Oluwatosin A. Akinruli, Philip O Abolanle (Ekiti State University Teaching Hospital); Emmanuel I Eze (Eleta Eye Institute); Danjuma Sale (Epsilon Specialist Hospital Barnawa); Barnabas T Alayande (Faith Alive Foundation); Christopher N Ekwunife (Federal Medical Center, Owerri); Chukwuma E Okereke, Chinwendum U Ekpemiro, Akinwale Ibrahim Afolabi, Oluniyi O Olubayo, Oluwasuyi E Ige, Olaolu O Adebayo, Ademola T Adebajo, Ngozi Nwahir (Federal Medical Centre, Owo); Abiodun Idowu Okunlola, Olakunle F Babalola, Owolabi D Ojo, Abiodun Idowu Okunlola, Ojo D Dele, Idowu Adebayo, Tesleem O Orewole, Paul O. Abiola, Abiyere O. Henry (Federal Teaching Hospital, Ido Ekiti); Ifeanyichukwu M Chukwu (Irrua Specialist Teaching Hospital); Olufemi E Idowu,, Iloba G Njokanma, Olabamidele A Ayodele, Omolara M. Williams, Omolara M Faboya (Lagos State University Teaching Hospital); Thomas Olagboyega Olajide, Ahmed A Salawu, Aloy Okechukwu Ugwu, Justina O Seyi-Olajide, Oluwaseun A Ladipo-Ajayi, Orimisan Belle (Lagos University Teaching Hospital); Taopheeq B Rabi (LAUTECH Teaching Hospital); Oluwale Olayemi Olaomi, Onyedika G Okoye (National Hospital); Soliudeen A Arojura, Gbenga E Jones (National Orthopaedic Hospital Dala); Okechukwu H Ekwunife, Ochonma A Egwuonwu, Chiemelu D Emegoakor, Victor I Modekwe (Nnamdi Azikiwe University Teaching Hospital); Olugbenga O Ojo, Simon A. Balogun, Temitope O. Ajekwu, Henry E Omon, Christopher O Anele, Abdulhafiz O. Adesunkanmi, Omotade A. Ijarotimi, Edward O Komolafe, Samuel C. Ajekwu, Adewale O. Adisa, Funmilola O. Wuraola, Adebayo M Olugbami, Adewale A Aderounmu, Olubukola O. Allen, Akeem A. Adeleke, Adedayo O Lawal, Fayowole O. Nana, Oluwatoyin O. Fadare, Mohammed Maigana (Obafemi Awolowo University Teaching Hospitals Complex); Akaninyene E. Ubom, Tajudeen O. Mohammed (Obafemi Awolowo University Teaching Hospitals Complex Wesley Guild Hospital Unit); Amos O. Adeleye, Lateef A Baiyewu, James A. Balogun, Akinyinka O. Omigbodun, Timothy O Aladelusi, Eber O Ugwu, Oluwale A. Ogundoyin, Afieharo I Michael, Tolulope O. Ogunrewo, Oluwabukade T Ojedian, Ifeanyichukwu K. Egbuchulem, Nelson U Okoh, Olakayode O. Ogundoyin, Olubunmi E. Odeyemi, James O Eytayo, Olayinka A. Olawoye, Taiwo A. Lawal, Olumide D Akinmoju, Rukiyat A. Abdus-Salam, Constantine Ezeme, Shekinah Y Williams, Ajibola B Oladiran, Samuel T. Oladejo, Izegaegbe O. Obadan, Goodluck A Nwachukwu, Samuel A Ademola, Ikechukwu B Ulasi, Chiedozi K. A. Ikwu, Folake B Lawal, Oghenekevwe E Okere, Adefemi O. Afolabi,



Olukayode O Abayomi, Olalere O. Gbolahan, Tolulope O. Ogunrewo, Adegbolahan J Fakoya, Adebolajo A Adeyemo, Ogunkeyede S. Ayodeji (University College Hospital, University of Ibadan); Habiba I Abdullahi , Samuel A Sani, Stephen E. Garba, Bilal Sulaiman, Samson Olori, Godwin O Akaba (University of Abuja Teaching Hospital); Esezobor P Egbor, , Emeka D Odai, Michael C. Ezeanochie, Omorodion O. Irowa, Peter I Agbonrofo, Amina L Okhakhu, Ngozi C Onyeagwara, Nnamdi J Nwashilli, Ekene V Ezenwa (University of Benin Teaching Hospital); Chidiebere Peter Echieh (University of Calabar Teaching Hospital); Hadijat O Raji, Jibril O Bello, Abdulrasheed A. Nasir, Lukman O Abdur-Rahman, Ademola A Popoola (University of Ilorin Teaching Hospital); Felix O. Kumolalo (University of Medical Sciences Teaching Hospital Complex); Uchechukwu O Ezomike, Ndubuisi O. Onyemaechi, Bolaji A Akanni, Vincent Chidi Enemu, Ikechukwu A. Nwafor, Ugochukwu U Nnadozie, Aloy Okechukwu Ugwu (University of Nigeria Teaching Hospital); Rosemary N Ogu, John I Ikimalo, Kelechi E Okonta, Dabota Y Buowari, (University of Port Harcourt Teaching Hospital).

**Norway:** Knut Magne Augestad, Gurpreet Singh Banipal (University of Oslo and Akershus University Hospital).

**Oman:** John Massoud, Amur Al Ismaili (Khoula Hospital Muscat); Zainab Nasser Al Balushi, Mustafa M Alward, Hilal A. Al Sabti, Abdullah S. Al-Mujaini, Dhruva Nath Ghosh, Farman Ali, Bashar A Dawud, Sareyah AlSibai (Sultan Qaboos University Hospital Muscat).

**Pakistan:** Russell S Martins, Lubna M Vohra, Shoaib Muhammad, Azza Sarfraz, M Tayyab H. Siddiqui, Arsalan Pervaiz, Sakina S Abidi (The Aga Khan University Hospital, Karachi); Pawan K Thada (Allied Hospital, Faisalabad); Sidra Aleem, Saud J Choudhry (Bahawal Victoria Hospital, Bahawalpur); Eesha Yaqoob (Benazir Bhutto Hospital, Rawalpindi); Asad A Kerwala (Cancer Foundation Hospital, Karachi); Muhammad H Chaudhary (Chaudhary Pervaiz Elahi Institute of Cardiology, Multan); Muhmmad A Chaudhary (Children's Hospital, Pakistan Institute of Medical Sciences, Islamabad); Mujahid Z Ali (Combined Military Hospital Peshawar); Imran Mazhar (Combined Military Hospital Jhelum); Omer B Khalid (Creek General Hospital, Karachi); Nabila Kausar (DHQ Hospital Sheikhpura); Muhammad I Khokhar (DHQ Teaching Hospital, Gujranwala Medical College, Gujranwala); Allah Nawaz, Muhammad U Malik (District Headquarter & Teaching Hospital - Sargodha); Adam U A Butt, Abdur Rehman (District Headquarter Hospital - Rawalpindi); Muhammad A Ghufuran, Lajpat Rai, Sajida Qureshi, Summaya Saeed, Aafia Maqsood, Khursheed A Samo (Dr Ruth K.M. Pfau Civil Hospital, Karachi); Zouina Sarfraz (Sir Ganga Ram Hospital,

Lahore); Manahil Jamil, Saad Javed, Tayyab M Khan, Muhammad S Khan, Areeb Khalid (Holy Family Hospital, Rawalpindi); Shahzad A Khan (Independent Medical College Faisalabad); Ayesha Javed (Islamabad Medical Complex, Islamabad); Muhammad M Khan, Faiqa Zaki, Sajid Malik, (Jinnah Hospital, Lahore); Shahneela Manzoor, Mariyah Anwer (Jinnah Postgraduate Medical Center, Karachi); Waleed Mabood (Mercy Teaching Hospital Peshawar); Mohammad S Aaghar, Qasim Mehmood, Hassan Waqar, Azwa Janjua, Sobia Manzoor, Ehsan A Khan, Sajeela Murtaza, Muhammad A Anjum, Muhammad S Farooq, Muhammad K Munir (King Edward Medical University - Mayo Hospital, Lahore); Muhammad S Akhtar, Syed I Bukhari, Shams U Rehman, Faaiz A Shah (Lady Reading Hospital, Peshawar); Awais A Malik (Lahore General Hospital, Lahore); Shamail A Syed, Imad-ud-din Saqib (Maroof International Hospital Islamabad); Hassan Mushtaq, Kashif Z Mahesar (National Institute of Cardiovascular Diseases, Karachi); Muhammad Tariq (North West General Hospital and Research Centre, Peshawar); Aun Ali (Pakistan Air Force (PAF) Faisal Base Hospital, Karachi); Raza Sayyed (Patel Hospital, Karachi); Asrar Ahmad (PNS Shifa Hospital, Karachi); Noor U H Maria (Punjab Institute of Neurosciences, Lahore); Ayesha Iqbal, Abdul Rehman, Ahmad U Qureshi, Usman I Butt, Adeel Islam, Rana Danish , Ammar Waqas, Munaza A Javed, Dur-e Zahra, Saqib Ali, Usman I Butt (Services Hospital Lahore); Haroon J Majid, Ahsan Irshad, Muhammad A Naseer (Shaikh Zayed Hospital, Lahore); Irfan I Nasir (Shaukat Khanam Memorial Cancer Hospital and Research Centre, Peshawar); Ali H Bangash, Humera N Altaf (Shifa International Hospital, Islamabad); Syed M A Bukhari (Sindh Government Qatar Hospital, Karachi); Jehangir F Ali (Sindh Institute of Urology and Transplantation, Karachi); Muhammad Asif (SKBZ CMH Muzaffarabad); Samiullah K Niazi (South City Hospital, Karachi); Warda Tahir, Muhammad U Aziz, Nabila Talat (The Children's Hospital & The Institute of Child Health Lahore); Tanwir Khaliq , Abeer Irshad, Muhammad F Ahsan, Shahzad H Waqar, Fatima Mustafa (Pakistan Institute of Medical Sciences, Islamabad).

**Palestine, State of:** Mohamad A. Banat, Baha G Albaradiyyah, Farah Bilal Shahin (Al Makassed Islamic Charitable Society Hospital Jerusalem); Hamdoon Abu-Arish, Rami A Misk, Rawand Titi , Khalil N Abuzaina, Bashar Y Awad, Mohammad Y Awad (Beit Jala Governmental Hospital); Roa'a M Aljunaidi, Asala Khalil Hasani, Bushra K Pujee, Malak Y Jibreel, Orwa M Abusabha, Saja E Abusabha, Haneen I Eid (Al-Ahli Hospital); Abdalqader A. K Wishah, Abdallah Ibrahim AbuJlambo (Al-Aqsa Hospital); Mahran Daowd Darweesh (Al-Mezan Speciality Hospital); Ameer kh Shehada, Mohammed I Altallaa, Momin M. Y. Hilles (Al-Shifa Hospital); Abdallah M Alwali, Sewar A Elejla (Al-Shifa Hospital); Ayat A Aljuba, Mahmood R Manasra (Augusta Victoria Hospital); Hadeel I Awad (Beit Jala Governmental Hospital, Al Hussein); Sajeda y Karkour (Bethlehem Arab Society for

Rehabilitation); Amal M Shawabka, Bara M Abulrayyeh (Dura Governmental Hospital); Omar A. Mousa (European Gaza Hospital); Sarah Amro, Fatima I Aburayyan , Tareq Z Alzughayyar, Jihad S Zalloum, Hamdoon J Abu-Arish, Fida K Hussien-Al-Ali, Tamer S Asafrah, Sami D Jabari, Omar Q Heih, Rahaf Haitham Muhtaseb, Malak Y Jibreel, Asala K Hasani, Omar Khaled Alsarahna (Governmental Hebron Hospital-Alia); Abdelrahman M Alwali (Indonesian Hospital); Ahmed Hassan Albelbeisi (Kamal Adwan Hospital); Mustafa A. Abu Jayyab (Nasser Hospital); Omar H Salloum (Rafidia Hospital).

**Panama:** Adalberto Yangüez (Hospital Chiriquí); Reinaldo Isaacs Beron, Mariela G Hurtado (Hospital Regional Rafael Hernandez CSS).

**Paraguay:** Hugo A Gomez (Centro Médico La Costa); Fanny Corrales, Kiichiro Matsumura (Hospital Central Instituto de Prevision Social); Alejandro Arévalo, María José Martínez, Brayan D Pedrozo, Rosa I Sánchez, Dulce Añazco, Cristian Chavez, Cesar G Sisa, Herald R Segovia-Lohse (Hospital De Clínicas); Helmut A. Segovia-Lohse (Hospital General de Lambaré); Eduardo R. Santacruz (Hospital Nacional de Itauguá); Alejandro G Leiva (Hospital San Jorge, Instituto Nacional de Cardiología).

**Peru:** Cesar A Cano (Arzobispo Loayza National Hospital); Christian M. Lozano (British American Hospital); Giuliano Borda-Luque (Cayetano Heredia National Hospital); Lucero Torres-Gomez, Ricardo Arones (Dos de Mayo National Hospital); W Samir Cubas (Edgardo Rebagliati Martins National Hospital); Carlos J Shiraishi-Zapata (Hospital II Talara); Gian C Mendiola, Joel J Sánchez (Hospital Santa Rosa de Lima); Francisco E Berrospi (Instituto Nacional de Enfermedades Neoplásicas); Glenda M Falcon (Instituto Regional de Enfermedades Neoplásicas del Sur).

**Philippines (the):** Clarence Pio Rey C Yacapin, Amabelle A Moreno (Batangas Medical Center); Aeris Jane D Nacion (Eastern Visayas Regional Medical Center); Alberto B Roxas (Manila Doctors Hospital); Hazel Z Turingan (Hospital Ng Maynila Medical Center); Marie Carmela M Lapitan, Claudine Rosario B Lukban, Marie Dione P Sacdalan (University of the Philippines - Philippine General Hospital); Jose Antonio M Salud, Jeryl Anne S R Reyes, Marinelle M Castro, Ron Daniel Rivera (The Medical City); Maymona J Choudry (Vicente Sotto Memorial Medical Center); Noruel Gerard A Salvador (Westlake Medical Center).

**Poland:** Karol Szyluk (District Hospital of Orthopedics and Trauma Surgery); Marcin Bobiński, Karolina Rasoul-Pelińska (Medical University of Lublin, Independent Public Teaching Hospital No 1); Piotr Major, Justyna Rymarowicz (University Hospital, Kraków);

Pawel Miotla, Konrad Futyma (Medical University of Lublin, Independent Public Teaching Hospital No 4); Maciej Walędziak (Military Institute Of Medicine).

**Portugal:** Sofia G Reis (Centro Hospitalar Barreiro Montijo, EPE); João T Oliveira, Marisa D Santos (Centro Hospitalar do Porto); João Rocha-Neves, António Pereira-Neves, Fabio Gomes, Jorge P M Nogueiro, Sara Castanheira Rodrigues , Pedro C Santos, André de Araújo Pereira, Joao Barbosa-Breda, Diogo D Monteiro, Luís Duarte-Gamas, Leandro Nóbrega, Lara R Dias (Centro Hospitalar Universitário de São João); Carlota Ramos (Centro Hospitalar Lisboa Norte); Rita G Branquinho (Centro Hospitalar Médio Tejo); Miguel F Cunha (Centro Hospitalar Universitário do Algarve - Unidade de Portimão); Nelson J Silva (Hospital CUF Infante Santo); Ana Cláudia M Deus (Hospital do Litoral Alentejano); Pedro Azevedo Serralheiro (Hospital Dr. Antonio José de Almeida); Ana P Soares (Hospital Faro, Centro Hospitalar Universitário do Algarve); Susana A Henriques, Pedro Botelho, Brigitta Cismasiu, Ana L Barreira (Hospital Garcia de Orta); Miguel Ángel Fernández Romero (Hospital Santa Luzia Elvas); Paulo Santos-Costa, Cristina Costeira (IPO Coimbra); João M Carvas (Unidade Local de Saúde do Nordeste).

**Qatar:** Fayez Mohamed Bin Omran (Al Wakrah Hospital - Hamad Medical Corporation); Ejaz A Latif, Ali T Toffaha, Mohammad Sameer, Amjad S Qabbani, Hussam E Elmelliti, Hamzah El Baba, Mohamed T Khalifa, Saif Badran, Mohamed Said Ghali (Hamad General Hospital).

**Republic of North Macedonia:** Maja Konjanoska, Snezhana B. Kavain (City Hospital 8 Septembar); Biljana Kuzmanovska, Albert Lleshi, Anita Kokareva, Biljana T Kiprijanovska, Vanja Trajkovska, Marta T Nicevska, Aleksandra Gavrilovska-Brzanov, Marjana Burmuzoska, Tatjana Davitkovska, Aleksandra Jakimovski, Filip Kostovski, Biljana Eftimova , Anita Kokareva , Simon Trpeski (University Clinic for Traumatology, Orthopedics, Anesthesia, Reanimation, Intensive Care Unit and Emergency Center); Biljana R. Korunoska-Merdjanoski (General Hospital Gostivar); Blagoj T Shuntov, Venko Filipce, Vladimir Rendevski, Anita Fileva (University Clinic for Neurosurgery, Faculty of Medicine, University St. Cyril and Methodius); Toni Risteski (University Clinic for Pediatric Surgery); Sofija Pejкова, Gordana Georgieva, Blagoja Srbov, Bisera Nikolovska (University Clinic for Plastic and Reconstructive surgery, Faculty of Medicine, University St. Cyril and Methodius), Andoncho Peltekovski (University Clinic for Gynecology and Obstetrics); Stavridis A. Sotir (University Clinic of Urology); Katerina Kasapinova (University Surgery Clinic St. Naum Ohridski).

**Romania:** Ioan Alexandru Florian, Radu Drasovean (Cluj-Napoca Emergency County Hospital); Mihai-Stefan MA Muresan (Cluj-Napoca Municipal Hospital); Florin Grama, Andrei Chitul, Cosmin Bezede, Emilica Ciofic, Daniel Cristian (Coltea Clinical Hospital); Elena Adelina Toma, Valentin Calu, Adrian Miron, Octavian Enciu (Elias Emergency Hospital); Ionut Negoii, Ionut Bogdan Diaconescu, Bogdan Stoica (Emergency Clinical Hospital Bucharest); Mihai G Stefan, Liana Voleanu (Emergency Institute for Cardiovascular Diseases "Prof. Dr. C.C. Iliescu"); Raluca Bievel Radulescu, Nicolae Gh Bacalbasa (Fundeni Clinical Institute); Natalia Motas, Madalina C. Iliescu, Veronica Manolache, Mihnea Davidescu (Institute of Oncology Prof Dr Al Trestioreanu); Andreea-Madalina Serban, Sebastian N Ionescu (Maria Sklodowska Curie Emergency Hospital); Eduard-Alexandru Bonci, Andrei Pasca, Roxana A Coman, Ioan-Catalin Vlad (Prof Dr Ion Chiricuta Institute of Oncology); Sorinel Lunca, Ana-Maria Musina, Natalia Velenciuc, Gabriel Dimofte (Regional Institute of Oncology Iasi); Octav Ginghina, Radu Mirica, Razvan Iosifescu, Andrei B Vacarasu, Mara Mardare, Andrada Spanu (Saint John Emergency Hospital); Silviu-Tiberiu Makkai-Popa (Sf. Constantin Hospital); Vlad V Porumb (Spitalul Clinic de Urgență Militar Dr Iacob Czihac); Stelian S. Mogoanta (Spitalul Judetean De Urgenta Din Craiova); Narcis O Zarnescu, Radu V Costea, Eugenia C Zarnescu (University Emergency Hospital Bucharest).

**Russian Federation (the):** Ayrat Kaldarov (AV Vishnevsky Center of Surgery); Vasily I Kaleda (Central Clinical Hospital of the President Administration); Tatiana A Kremenchugskaya (City Clinical Hospital No. 29 ); Sergey K. Efetov, Vladimir V Balaban (IM Sechenov First Moscow State Medical University); Andrey Litvin (Immanuel Kant Baltic Federal University, Regional Clinical Hospital, Kaliningrad); Nikita N Burlov, Gleb Khrykov (Leningrad Regional Clinical Oncology Dispensary); Aleksandr G. Butyrskii (Municipal Emergency Hospital No.6); Khasan E Dzhumabaev (N.N.Blokhin Russian Cancer Research Center); Igor V Pravosudov (N.N.Petrov Research Institute of Oncology); Pavel A Ermolaev (Omsk Regional Clinical Hospital); Arkady L Bedzhanyan, Yulia V Frolova (Petrovsky National Research Centre of Surgery); Yurii Kudryavcev, Konstantin Kim, Tatyana Mikhaylova, Vyacheslav Ten (Private healthcare institution "RZD-Medicine" Yuzhno-Sakhalinsk"); Alexey Yanishev (Privolzhsky Research Medical University); Anastasia Novikova, Rostislav Pavlov, Gleb Kim, Dmitry Shmatov, Maxim Stolyarov (Saint Petersburg State University Hospital); Evgeniy S Drozdov (Tomsk Regional Oncology Hospital); Petr Mikhailovich Chavkin (Ulyanovsk Regional Clinical Center for specialized types of medical care); Mahir Gachabayov (Vladimir City Emergency Hospital).

**Rwanda:** Irénée Niyongombwa (Bushenge Provincial Hospital); Stephen P Bennett (Gahini Hospital); Christophe Mpirimbanyi (Kibagabaga Hospital); Jean Bosco Katabogama, Hirwa Aime Dieudonne (Ruhengeri Referral Hospital); Ainhwa Costas-Chavarri, Fidele Byiringiro, Eugene Muneza, Nzabamwita Liliane (Rwanda Military Hospital); Kubwimana Olivier, Severien Muneza (University Teaching Hospital of Kigali – CHUK).

**Saint Kitts and Nevis:** Lee-Min Lai (Joseph N France General Hospital).

**Saudi Arabia:** Alshahrani Mushabab Ali, Saeed Baradwan (Aseer Central Hospital); Mohammad K Alam (College of Dentistry, Jouf University); Nasser A. N. Alzerwi (Majmaah University/Dr Sulaiman Al-Habib Medical Group (HMG)); Arif Hussain, Umar Rahim Bakhsh, Abdullah Alkhalaf, Mohammed H Alnasser, Rajkumar Rajendram, Yadullah Syed, Hattan F Dagestani, Abdullah T Eissa (King Abdulaziz Medical City, Riyadh); Munira A Al Suwailem (King Abdulaziz National Guard Hospital); Ali H Farsi, Deema Farsi, Nadim Malibary, Abdulmalik Altaf, Mohammed Basendowah, Saleh S Baeesa, Nouf Y Akeel, Nora Hatem Trabulsi, Abdullah M Bahakim, Khalid Bajunaid, Mohammed H Bangash, Mohammed Alharthi, Murad Aljiffry, Abdulrahman J Sabbagh, Nasir M Bustangi, Basmah S Altuwayjiri, Amani m Alhaddad, Mohammed A Ghunaim, Ali A Samkari (King Abdulaziz University Hospital); Mohammed A Elzain, Ahmed Y AlAmeer, Dauda Bawa, Mohammed A Elzain (King Abdullah Hospital); Hadeel A Ghunaim, Abdulrhman A Ghunaim, Hind Waleen M Mousa (King Fahad General Hospital); Abdulrhman Saleh Almulhim (King Fahad Hospital Hofuf); Abdulaziz M Alshammari, Mohammed Abuzaid (King Fahad Medical City); Emad J Al Absi, Mohammed Abdulrazzaq Al Duhileb, Nora E Almana, Ali A Alzahir, Fozan Abdulqader Aldulajjan, Ameera, Tariq Madkhali, Turki F Alshammari, Bikheet Moh Almatar (King Fahad Specialist Hospital); Salman Mufareh Ghazwani (King Fahd Central Hospital, Jazan University); Amal A Hamid, Soliman F Ghedan (King Faisal Medical Complex); Amal Alhefthi, Osama Alomar, Ismail Al-Badawi, Hani Salem, Ahmed Abu-Zaid, Ahmed Nazer (King Faisal Specialist Hospital); Ahmad K Alnemare, Musaed F Rayzah, Ahmed M Alzahrani, Saad M Alqahtani (King Khalid General Hospital); Anas A Hasson Alnajjar, Mohammad Alyami, Amar Faisal Elawad, Mashhour H Alqannas, Delia Cortes-Guiral (King Khalid Hospital); Yousef S Alalawi, Ahmad S Alayed, Youssef A Alishi (King Salman Armed Forces Hospital); Sharfuddin Chowdhury (King Saud Medical City); Raed Almannie, Thamer Nouh, Mohammed N AlAli, Ahmad M Almalki, Kaleem Ahmed, Abdullah E. Kattan (King Saud University); Abdu Hasan Ayoub (Prince Mohd Bin Nassir Hospital); Eyad I. Al-Kharashi, Fahad Khalid Aljaber, Abdullah H Alghamdi, Ibrahim Al Hasan, Fatima Ahmed Badahdah (Prince Sultan Military Medical City); Jubran J. Al Faifi (IMSIU Medical Center); Abdullah A Albarrak (Sudair General Hospital).

Commented [MP(HR1)]: Needs check

**Senegal:** Abdou Niasse (Hôpital Principal de Dakar, Hôpital d'Instruction des Armées); Abdourahmane Ndong (Saint-Louis Regional Hospital).

**Serbia:** Nikola Slijepcevic, Ivan Paunovic, Vladan Zivaljevic (Clinic for Endocrine Surgery, University Clinical Centre of Serbia); Stefan Kmezic, Aleksandar M Sekulic, Jelenko R Jelenkovic, Ivan B Dimitrijevic, Goran I Barisic, Marko M Miladinov, Zeljko Z Grubac, Boris S Tadic, Nikola Grubor, Ivana Pavlovic, Milorad Reljic, Aleksandar M Sekulic, Milica D Mitrovic (Clinic for Digestive Surgery, Clinical Centre of Serbia); Dusan Micic, Zlatibor Loncar, Pavle Gregoric (Clinic for Emergency Surgery, Emergency Centre); Aleksandar Karanikolic, (Clinic for Endocrine Surgery University Clinical Center Niš) Goran Z Stanojevic (Clinic for Digestive Surgery, University Clinical Center Nis); Milan D Perovic (Clinic for Gynecology and Obstetrics Narodni Front); Drago Jelovac (Clinic for Maxillofacial Surgery, School of Dental Medicine, University of Belgrade); Rosanda V Ilic, Aleksandar D. Miljković, Ivan Bogdanovic (Clinic for Neurosurgery, Clinical Center of Serbia); Ana D Jotic (Clinic for Otorhinolaryngology and Maxillofacial Surgery, Clinical Center of Serbia); Lazar Davidovic (Clinic for Vascular and Endovascular Surgery, Serbian Clinical Center); Uros Bumbasirevic, Nebojša J Prijović, Veljko Santric, Branko M Stankovic (Clinic of Urology, Clinical Center of Serbia); Dejan D Stevanovic, Aleksandar V Lazic, Nebojsa D Mitrovic (Clinical Hospital Centre of Zemun); Dragana D Zivkovic (Institute for Child and Youth Health Care of Vojvodina); Ivan Z Markovic, Marko N Buta, Merima R Goran (Institute for Oncology and Radiology of Serbia); Dragana R Radovanovic, Zoran Radovanovic, Sanja Zahorjanski, Aleksandar Djermanovic Mladjan Protic, Milana Kresoja-Ignjatović, Mladen Djurić, (University of Novi Sad, Faculty of Medicine Novi Sad, Oncology Institute of Vojvodina); Mikan R Lazovic, Sinisa V Ducic (University Children's Hospital); Bojan M Kovacevic, Jovana M Bojicic, Jovan T Juloski, Igor Krdzic, Vladan Z Milutinović (Zvezdara University Medical Center).

**Singapore:** Chi Wei Mok (Changi General Hospital); Doris Mae Dimatatac (KK Women's and Children's Hospital); Ker-Kan Tan, Bettina Lieske (National University Hospital); Shuxun Lin, Han Boon Oh (Ng Teng Fong General Hospital); Sabrina Ngaserin, Frederick H Koh, Faith Qi Hui Leong, Tousif Kabir (Sengkang General Hospital); Jeffrey J Leow, Ming Ngan Aloysius Tan, Wei-Wen Ang, Vishal G Shelat (Tan Tock Seng Hospital).

**Slovakia:** Radoslav Morochovič (L. Pasteur University Hospital); Kristián Šimko, Ladislav Czako, Branislav Gális, Michal Vavro, Bronislava Dvoranová, Marek Soviš, Ivana Vidová (University Hospital Bratislava).

**Slovenia:** Miran Rems (General hospital Jesenice); Jurij A Kosir, Ales Tomazic, Jan Grosek, Tajda Kosir Bozic (University Medical Centre Ljubljana), Dejan Bratus, Milena Senica Verbic, Vojko Flis, Niko Kavčič, Andrej Cokan (University Medical Centre Maribor).

**Somalia:** Ismail M Hersi , Abdifatah D Ali, Abdisamad A Aidid , Abas A Farah, Asma M sh. Ahmed (Hargeisa Group Hospital).

**South Africa:** Vered Lack (Charlotte Maxeke Johannesburg Academic Hospital); Maria Fourtounas (Chris Hani Baragwanath Academic Hospital); Christo Kloppers, Naser Almgla, Eugenio Panieri, Francois Malherbe (Groote Schuur Hospital); Timothy C Hardcastle (Inkosi Albert Luthuli Central Hospital); Reinier Swart (Shelly Beach Hospital); Colin B Noel, Asha Franciska Malan, Corné PG Nel (Universitas Academic Hospital Complex).

**Spain:** Carolina Lugo, Alfonso Lagares, Cristina Ojeda-Thies (12 de Octubre University Hospital); Marta Paniagua García-Señoráns, Vincenzo Vigorita , Laura Rodríguez Fernández, Oscar Cano-Valderrama (Álvaro Cunqueiro Hospital); Andrea Jiménez Salido (Comarcal Alt Penedés); Luis Angel Suarez Gonzalez, Sara Busto Suarez, Mateo Hevia, Mario de Arriba Alonso, Teresa Renedo Villar (Complejo Asistencial Universitario de León); Isabel Valentín-Gamazo González (Complejo Asistencial Universitario de Palencia); Jacobo Trebol (Complejo Asistencial Universitario de Salamanca); Miguel Mayo-Yáñez (Complejo Hospitalario Universitario A Coruña); Cristina Barrena López, Ana Sánchez Mozo (Complejo Hospitalario Universitario de Albacete); Octavio Arencibia, Daniel Gonzalez Garcia-Cano (Complejo Hospitalario Universitario Insular-Materno Infantil); Leticia Gómez Viana (Complejo Hospitalario Universitario de Ourense); Ladislao Cayetano Paniagua (Consorci Sanitari de Terrassa); Carolina Martinez-Perez, Antonio Melero Abellán, Carolina S Romero, Juan C Catalá (Consortio Hospital General Universitario); Bernardo Núñez-García, Antonio Gimenez Gaibar, Natalia Álvarez García (Corporación Sanitaria Parc Taulí); Josep M Muñoz Vives (Fundació Althaia - Xarxa Assistencial Universitària de Manresa); Aránzazu Calero-Lillo (Fundació Hospital de l'Esperit Sant); José M Villacampa, Víctor Domínguez-Prieto (Fundación Jiménez Díaz University Hospital); Virginia Jiménez Carneros, Laura Alonso-Lamberti, Alba Manuel-Vazquez, Ainhoa Valle Rubio (Getafe University Hospital); Julio Domenech, Ignacio Miranda (Hospital Arnau de Vilanova); Hanna Perez Chrzanowska (Hospital Cantoblanco); Lucila Marquez (Hospital Central de la Cruz Roja San Jose y Santa Adela); Albert Baduell, Mariano Balaguer-Castro, Pilar Camacho Carrasco, Marina Cámara Vallejo, Borja Campuzano Bitterling, Anna Carreras-Castañer, Guillem Claret, Francisco J Cuesta-



González, Alberto Di Somma, Joaquim Enseñat Nora, Neus Fabregas, Ada Ferrer Fuertes, Abel Ferrés, Cesar Ginesta, Jose J Gonzalez Sanchez, Isabel Gracia, Jhon A Hoyos Castro, Montsant Jornet-Gibert, Xavier Morales, Alejandra Mosteiro-Cadaval, Leire Pedrosa, José Poblete Carrizo, Marina Renau-Cerrillo, Luis A Reyes Figueroa, Pedro Roldan Ramos, Jordi Rumià Arboix, Marta Sabater-Martos, Ramon Sieira-Gil, Thomaz E Topczewski, Jorge Torales, Ramon Torné, Pere Torner, Víctor Turrado-Rodríguez, Ricard Valero, Marian Vives-Barquiel, Marta Suñer Campanales, Raúl Jiménez Aguilar, Adriana Bravo, Sergio Giles, Daniel Martín Barreda, Marc Ferrer, Lorena Gómez López, Maria F Peraza Godoy, Roger Pujol Muncunill, David Gutierrez Medina, Yury Postnikov, Alfonso Alías Petralanda, Montserrat Monfort-Mira, Xavier Carreras-Castañer, Luis J Ramirez, Alba Torroella-Vallejo, Borja de Lacy, Clara Chimeno Pigrau, Eloy García Diez, Carles Martí Pagès, Rocío Gallego Sobrino, Caribay Vargas, Èrica A Segura Nebot, Jesús D Narvaez, Oscar Ares, Alonso Zumbado, Salvador E Madariaga, Maria M Llompart Coll, Leticia Torres Iñiguez, Carolina González, Justo Gómez, Paula Dominguez, Carolina Montoya, Mariona Balart, Miguel del Pino, Oscar García Lillo, Ricardo Ostita, Saúl Palomino-Chulla, Manuel López-Baamonde (Hospital Clinic Barcelona); Barbara Burgos-Blasco, Jana Dziakova, Jaime Rodriguez de Alarcon, Beatriz Vidal-Villegas, Ignacio Cristóbal, Jose M Martinez-de-la-Casa (Hospital Clinico San Carlos); Rafael Badenes, David Moro-Valdezate (Hospital Clínico Universitario de Valencia); Beatriz De Andrés-Asenjo, Juan Bustamante-Munguira, Héctor J Aguado, Nuria Ruiz-Lopez, Adela Pereda-Manso, Yolanda Carrascal, María Bragado González, Elvira Mateos Álvarez, Juan Berrocal Cuadrado , Sergio Chávez Valladares, Bárbara Segura Méndez, , Clarisa Simon-Perez, Virginia Garcia-Virto, Begoña A Alvarez-Ramos, M Carmen Cervera, María Plata, Ana Zabalza, Gregorio de J Labrador Hernández, Juan Bustamante-Munguira, Jeancarlos Trujillo-Díaz (Hospital Clínico Universitario de Valladolid); Dolores Arribas (Hospital Clinico Universitario Zaragoza); Giulia Vitiello, Santiago Sánchez-Cabús (Hospital de la Santa Creu i Sant Pau); Heura Llaquet-Bayo (Hospital de Palamós); Cristina Martin-Villares (Hospital del Bierzo); Ana Minaya-Bravo, Manuel Medina, Enrique Gonzalez, Ana Sánchez-Gollarte, Armando Galvan Perez, (Hospital Universitario del Henares, Universidad Francisco de Vitoria, Madrid); Miguel Ruiz Marín, Emny R Bobadilla Romero, Milagros Carrasco Prats, Clara Giménez-Francés, Rebeca Gonzalez, Marta M Arroyo-Domingo, Jesús A Marínez-Alonso, Alejandra Jara Maquilón, Laura Guillamon-Vivancos , Ana Isabel Avellaneda Camarena, Alfonso Capitan, Enrique Viviente Rodriguez, Alfonso Marco-Garrido (Hospital General Reina Sofía Murcia); Marta Roldón Golet (Hospital General San Jorge); Mercedes Estaire-Gómez, Francisco Javier Redondo Calvo (Hospital General Universitario de Ciudad Real); Luis Sánchez-Guillén, Álvaro Soler-Silva (Hospital General Universitario de Elche); Olga Mateo-Sierra, Begoña Quintana-Villamandos, Manuel Tousidonis (Hospital General

Universitario Gregorio Marañón); Florencio M Marin, Pablo Rodríguez Garcia (Hospital General Universitario Santa Lucía); Miguel A Freiria Eiras (Hospital HM Rosaleda); Marc Vallve-Bernal (Hospital Insular Nuestra Señora de Los Reyes); Silvia Bleda, Joaquín De Haro, Joaquin De Haro (Hospital Los Mandronos); Paula Troncoso (Hospital Mateu Orfila); Juan C. Martín del Olmo, Juan R Gómez-López (Hospital Medina del Campo); Melody García Domínguez (Hospital Obispo Polanco); Jose M Morales-Puebla (Hospital Quironsalud Ciudad Real); Isabel López-García (Hospital Reina Sofia); Jorge Escartin, Issa Talal El-Abur, David García Aguilera (Hospital Royo Villanova, Zaragoza); Oriol Martin-Sole, Sonia Pérez-Bertólez, Irene de Haro Jorge, Oscar Izquierdo Corres (Hospital Sant Joan de Deu); Ismael Mora-Guzmán (Hospital Santa Bárbara); Jose R Oliver Guillen, Alina Lopez de-Fernandez, Beatriz Fernandez-Velilla San-Jose (Complejo Asistencial de Soria); David Julià Bergkvist (Hospital Universitari de Girona Dr. Josep Trueta); Laura Ruiz-Villa, Maria del Mar Martí-Ejarque, Eduardo González Marín (Hospital Universitari Sagrat Cor, Grupo Quirón Salud); Alba Vázquez Melero (Hospital Universitario Araba); Lorena Varela (Hospital Universitario Central de Asturias); Mikel Prieto Calvo, Ibabe Villalabeitia Ateca, Arkaitz Perfecto, Patricia Alonso Carnicero, Elena Aranda, Patricia Martin-Playa, Leire Aparicio Elizalde (Hospital Universitario Cruces); Yaiza Galvañ (Hospital Universitario de Burgos); Julio Plata-Bello (Hospital Universitario de Canarias); June Fernández-Fernández (Hospital Universitario de Galdakao); Aida C Rahy-Martín, Clara Rosas-Bermúdez, Maria Pelloni, (Hospital Universitario de Gran Canaria Doctor Negrín); Marcello Di Martino, Jorge Prada Pendolero (Hospital Universitario de la Princesa); David Díaz Pérez (Hospital Universitario de Torrejón de Ardoz); Manuel Losada,, María García-Conde, Beatriz Diéguez , Miguel Hernandez-Garcia (Hospital Universitario del Sureste); Francisco Ripoll Vidal (Hospital Universitario Doctor Peset); Jon Zabaleta (Hospital Universitario Donostia); Alvaro Sánchez Barrueco (Hospital Universitario General de Villalba); Pablo Beltran-Miranda (Hospital Universitario Juan Ramón Jiménez); Jose M Morales-Puebla, Jenny Guevara-Martínez , Pablo C Arteaga Asensio (Hospital Universitario la Paz); Sef Saudí, Ursula M Jariod-Ferrer, Maria V Duque-Mallén, Miguel A Dobon, Carlos Gracia-Roche (Hospital Universitario Miguel Servet); Fernando Mendoza-Moreno, Nelson Morales Palacios, Manuel Diez-Alonso, Belen Matías-García, Lucía Diego, Alma Blázquez-Martin (Hospital Universitario Principe de Asturias); Patricia Burgos-Blasco, Diego Ramos, Emilio Berna-Rico, Luis Ley, Fátima Sánchez-Fernández, Laura Del Río-Arroyo, Rafael Barberá, Alberto Cabañero Sánchez, Alberto G Barranquero, Lourdes Montes-Jovellar (Hospital Universitario Ramón y Cajal, Madrid); Francisco J Tejero-Pintor (Hospital Universitario Río Hortega); Javier Mata Estévez, Enrique Colás-Ruiz (Hospital Universitario Son Llätzer); Beatriz Gomez-Perez, Joaquin Moya-Angeler, Ana Delegido, Pedro José Gil Vázquez, Felipe Alconchel, Vicente J León-Muñoz, Tatiana Nicolás López (Hospital Clínico

Universitario Virgen de la Arrixaca (IMIB-Arrixaca), Murcia); Jose Pintor-Tortolero, Luis Tallon-Aguilar, Sandra Dios-Barbeito (Hospital Universitario Virgen del Rocio); Luis C Capitán, Juan-Carlos Gomez-Rosado, Luis C. Capitán-Morales (Hospital Universitario Virgen Macarena); Aitor Landaluze-Olavarría (Hospital Urduliz); Javier Ripollés-Melchor, Ane Abad-Motos, Elena Sáez-Ruiz, Alicia Ruiz-de-la-Hermosa (Infanta Leonor University Hospital); Antonio Perez-Ferrer, Manuel Moriche-Carretero, Remedios Revilla-Amores, Daniel Serralta de Colsa (Infanta Sofía University Hospital); Benito Alcaide (La Palma); Rubén Martín-Láez (Marqués de Valdecilla University Hospital); Emiliano Cano-Trigueros, Víctor Soria-Aledo (Morales Meseguer University Hospital Murcia); Nuria Aguado (San Agustín University Hospital); Juan J Segura-Sampedro (Son Espases University Hospital); Susana González-Suárez, Martín Espinosa-Bravo, Jorge H. Nuñez, Ramon Vilallonga, Antonio Gil-Moreno, Daniel Gil-Sala, Eloy Espin-Basany, Ruth Blanco-Colino, Manuel Lopez (Vall d'Hebron University Hospital); Jacob Motos Micó (Virgen de los Lirios).

**Sri Lanka:** Oshan Basnayake (Cancer Institute Maharagama); Umesh Jayarajah (District General Hospital Chilaw); Naveen S Wijekoon (Lady Ridgeway Hospital for Children); Indu A Jayawardane, Duminda Subasinghe, Sanjeewa A Seneviratne, Dakshitha P Wickramasinghe (National Hospital of Sri Lanka); Pramodh Chandrasinghe (North Colombo Teaching Hospital); Sujeewa .P.B.Thalgaspitiya, Anuradha B Jayathilake (Teaching Hospital Anuradhapura); Wasantha Wijenayake (University Hospital KDU).

**Sudan (the):** Israa A. Omer, Eman Elsadig Mustafa, AlQasim Mohammed Ahmed Abdallah (Al-Hassahissa Teaching Hospital); Ali A Ali (Al-rajhi); Ghalib N. El Hunjul, Deema Mohamedfagir Osman Mukhtar (Alban Jadid Hospital); Mustafa Mohamed Ali Hussein , Abdoalsalam Shogar (Almowada Hospital); Muneeb E Abdallah (Atbara Teaching Hospital); Abdalkader Shaar, Mohamed Nafea shaar, Mohamad khaled kora (Bashair Teaching Hospital); Khadija Ala Muhmmmed (Bugaa Specialised Hospital); Monira Mohammed Sarih (Elduiem Teaching Hospital); Mohammed E A Omer, Moyasar A Idris, Osama S Osman, Elharith MA Alawad, Mustafa Abdalla Bakhit Ebad, Ahmed M Ibrahim, Khider Altayeb Bakheet Abass (Gadarif Teaching Hospital); Alshareef Bakri Yousif Mohamed Nour (Gezira Trauma and Orthopedic center); Hytham K. S. Hamid, Khabab Abbasher Hussien Mohamed Ahmed, Mohja Elsheikh Obeid Ibrahim, Abubaker M Yassin , Salma Esam Mohamed Elhassan Abdelrahman, Adnan Ayman Alnaser (Ibrahim Malik Teaching Hospital); Tarig M Taha (Khartoum Teaching Hospital); Mohammed Elmujtba Adam Essa Adam, Abdelkareem A.Ahmed, Mustafa Abdalla bakhit Ebad, Mohammed Ahmed Idrees Saadelnour, Ali Mohamed Ahmed Adlan, Azzain Ismail (Medical and Cancer

Research Institute); Elmustafa Alkhalifa (Military Medical Hospital); Ibrahim Ali Mohamed Abdalaal (Omdurman Teaching Hospital); Tarig Fadalla, Mohamed Yahia Ibrahim, Elaf A. Hamdoun Aziz, Muhsin Mohammed Elhadi Agbna Mohammed, Tasneem A Mohamed (Ribat University Hospital); Ali Alsaeed Ali Alhag (Sea Corporation Hospital Portsudan); Rayan Ibrahim Hamid Mohamed (Soba University Hospital); Salih Boushra Hamza, Mohamed Abdelazim Mohamed Ali (Sudan Military Hospital); Nidal Youseef Altaher Aboh Ahmed, Albrra Alhag Mohamed Alhag, Mahmoud Saleh (University of Gezira - Wad Medani Teaching Hospital); Elmustafa Alkhalifa (Wad Medani Military Hospital).

**Sweden:** Monir Jawad (Central Hospital in Kristianstad); Anders Thorell, Josefin Segelman (Ersta Hospital); Rebecka Hultgren, Peter Elbe (Karolinska University Hospital); Michelle S Chew (Linköping University Hospital); Shahin Mohseni (Örebro University Hospital); Pamela Buchwald (Skåne University Hospital Malmö); Andreas Älgå, Gabriel Sandblom, Martin Nordberg (South General Hospital); Malin Sund, Martin Rutegård (Umeå University Hospital); Maziar Nikberg (Västmanlands Hospital Västerås).

**Switzerland:** Francesco Mongelli, Matteo Di Giuseppe, Andrea Papadia, Maria Luisa Gasparri, Morena Antonilli, Sotirios-Georgios Popeskou (Ente Ospedaliero Cantonale); Nicola Colucci (Groupement Hospitalier de l'Ouest Lémanique); Eleftherios Gialamas, Oliver Dwidar, Marc-Olivier Sauvain (Hopital de Pourtales); Christine F Maurus (Hôpital de Sion, Centre Hospitalier du Valais Romand); Gregor J Kocher, Lukas W Widmer, Simon A Mueller, Roland Giger, Sara-Lynn Hool (Inselspital, Bern University Hospital, University of Bern); Michel Adamina, Georgios Peros, Merima Misirlic, Bächler T, Daniel Schöni, Anas Taha (Kantonsspital Winterthur); Jörn-Markus Gass, Thomas Giesen (Luzerner Kantonsspital); Daniel Gero (Spital Männedorf); Silvio Däster, Savas D. Soysal, Stephanie Taha-Mehlitz, Athanasios Tampakis, Gabriel F Hess, Fabio Nocera, Otto Kollmar, Martin Bolli (University Hospital Basel).

**Syrian Arab Republic:** Mazen A Mohammad, Anas M Bakdash, Ramez KH Aljasem, Amer A Rahhal, Mohamad A Shareeda, Anas O Nyno, Mahrn Adnan Kahawati, Bassiel Alchiekh Yassien (Abd Al Wahab Agha Hospital); Bayan Alsaïd (Al-Assad University Hospital); Reham M Bnayan (Al-Hilal Hospital); Basel S Kouz, Mohammad Eyad Takahji, Zein Fouad Hasan, Aalaa Abduljalil, Nawras MAhalabi, Mohamad Basher A Al Jammal, Diana N Alia, Muhannad Homsî (Al-Mouwasat University Hospital); Joseph Masri, Ruqaya J Masri, Tayf Toutounji, Marwan Al Aliwy , Nasrullah Kabbani, Lama Kadoura , Dana Sultan, Luma Haj Kassem, Houmam Mohamad Al-Naeb , Maher M Al-Hajjaj, Wael Alkhaleel, Sarya Swed, Mohammad Yusuf Naal, Salim Tfankji, Mohammad Husein Rajab Almohammed, Wael

Alkhaleel , Mohammad Hassan Nabhan, Ahmad Al-Mouakeh , Mahfoud M Najjar, Ahmad Alhashash, Ahmad Ghazal (Aleppo University Hospital); Mhd Obai Alchallah , Homam Alolabi, Muhammad Omar ElHoms, Omar Rayes (Damascus Hospital); Weaam K Ezzdean (Ibn Al-Nafees Hospital); Antoine Naem, Salma MHD. Mazen Al-Houssami (Obstetrics and Gynaecology University hospital); Bardisan S Gawrieh, Alaa Hamdan, Naya Talal Hassan, Ali M Hammed, Elias George Elias, Elias George Elias, Elias George Elias, Aline Ali Ahmad, Mohammed Amr Knifaty, Ahmed M Moussa (Tishreen University Hospital).

**Taiwan (Province of China):** Iddrisu Baba Yabasin (Kaohsiung Medical University Hospital); Jun-Neng Roan, Chao-Jung Shih, Po Chuan Chen (Taiwan, Tainan, National Cheng Kung University, College of Medicine, National Cheng Kung University Hospital, Department of Surgery).

**Thailand:** Varut Lohsiriwat (Faculty of Medicine Siriraj Hospital, Mahidol University); Vorapong Phupong (King Chulalongkorn Memorial Hospital, Faculty of Medicine, Chulalongkorn University); Suphakarn Techapongsatorn (Vajira Hospital).

**Trinidad and Tobago:** Avery M. Lalchan (Eric Williams Medical Sciences Complex); Shane Charles (San Fernando General Hospital).

**Tunisia:** Bouchahda Rim (Hospital Farhat Hached); Malek Bouhani, Montassar Ghalleb (Institut Salah Azaiez); Amine Chamakhi, Amine Sebai (La Rabta Hospital); Nesrine Ben hadj dahman (National Institute of Neurology); Housseem Ammar, Mohamed Amine Said (Sahloul Hospital); Nahla Kechiche (University Hospital of Fatouma Bourguiba Monastir).

**Turkey:** Afaq Aghayeva, Onur Dülgeroğlu, Volkan Ozben, Erman Aytac (Acibadem Mehmet Ali Aydınlar University, School of Medicine, Acibadem Atakent Hospital); Deniz Atasoy (Acibadem Fulya Hospital); Akif Enes Arikan, Halil Kara (Acibadem Mehmet Ali Aydınlar University, School of Medicine, Acibadem Maslak Hospital); Nasuh U Dogan, Asli Bostanci, Murat Turhan, Ozlenen Ozkan (Akdeniz University Hospital); Ersin G. Dumlu, Ebru Menekşe, Volkan Oter, Erol Piskin, Ismail Hasirci, Muhammet Kadri Colakoglu, Erdal Birol Bostanci, Yigit Mehmet Ozgun, Behic Girgin (Ankara City Hospital); Serap Erel (Ankara Training and Research Hospital); Sibel Demirel, Özge Yanık, Ibrahim Ethem Gecim, Mehmet Ali Koc, Cihangir Akyol, Volkan Güner, Can Konca, Figen Batıoğlu, Musluh Hakseven (Ankara University Medical School); Tayfun Toptas (Antalya Education and Research Hospital); Yener Aydin, Ali B Ulas, Ilker Ince (Ataturk University School of

Medicine, Research and Training Hospital); Yuksel Altinel, Serdar Demirkan, Serhat Meric, Mehmet Salih Sevdı, Candas Ercetin (Bagcilar Research And Training Hospital); Sina Ferahman, Husnu Aydin, Ahmet Cem Dural, Nuri A Sahbaz (Bakirkoy Dr. Sadi Konuk Training And Research Hospital); Omer Yalkin (Bursa City Hospital); Murat Sen, Ozgen Isik, Ahmet Tuncay Yilmazlar (Bursa Uludag University School of Medicine); Tayfun Bisgin, Tayfun Bisgin (Dokuz Eylul Univ. Hospital); Banu Yigit , Banu Yigit (Elazig Fethi Sekin City Hospital); Arda Isik (Erzincan University Hospital); Sezai Leventoglu, Hüseyin bayhan (Gazi University Medical Faculty Hospital); Mehmet Z Buldanli (University of Health Sciences Gulhane Training and Research Hospital); Murat Gultekin, Omer Cennet (Hacettepe university hospital); Ertekin U Unal (Hitit University Erol Olcok Training and Research Hospital); Mehmet Çağlar Çakıcı, Ayberk Iplikci, Asif Yildirim (Istanbul Medeniyet University, School of Medicine); Ilker Ozgur, Comert Sen, Muserref B Dincer (Istanbul University - Istanbul Faculty of Medicine); Ergin Erginöz, Ahmet Necati Sanli, Akif Turna, Ahmet Askar, Server Sezgin Uludağ (Istanbul University-Cerrahpasa Cerrahpaşa Medical School); Cem E Guldogan, Mehmet M Ozmen (Istinye University Hospital Istanbul & Liv Hospital Ankara); Mehmet A. Bozkurt, Adem özcan, Yasin Kara, Ali Kocataş (Kanuni Sultan Suleyman Training and Research Hospital); Ali Guner (Karadeniz Technical University Farabi Hospital); Ramazan Sarı, Ecem Memisoglu, Kemal T Saracoglu , Yasin Tosun, Kenan Çetin (Kartal Dr. Lutfi Kırdar Training and Research Hospital); Erkan Kalafat, Cagatay Taskiran, Dogan Vatanserver, Burak Giray (Koç University Medical School); Ozan C Tatar (Kocaeli University Teaching Hospital); Hande Köksal, Mehmet Serkan Özkent (Konya City Hospital); Mehmet E. Ulutaş, Mustafa B. Hamarat (Konya Ci); Bora Coskun (Liv Hospital Ankara); Aykhan Abbasov (Liv Hospital Ulus); Ezgi Altinsoy (Manisa State Hospital); Tevfik Kivılcım Uprak, Ayten Saracoglu, M. Umit Ugurlu (Marmara University, School of Medicine); Emin Kose (Okmeydanı Training And Research Hospital); Utku Ozgen, Ugur Sungurtekin (Pamukkale University School of Medicine); Emre Gonullu, Zulfu Bayhan, Emrah Akin, Baris Mantoglu (Sakarya Faculty Of Medicine); Elif Colak, Gultekin Ozan Kucuk (Samsun Training and Research Hospital); Cemil Yuksel (Mersin City Training and Research Hospital); Ferit Aydın, Lutfi Dogan (SBÜ Ankara Onkoloji Eğitim ve Araştırma Hastanesi); Serdar Culcu (SBU Dr Abdurrahman Yurtaslan Ankara Onkoloji training and research hospital); Aydın Eray Tufan, Bulent Cıtegez (Sisli Hamidiye Etfal Training and Research Hospital); Göksever Akpınar (Tepecik Hospital); Ülkü C Köksoy (Ufuk University Faculty of Medicine Dr. Rıdvan Ege Hospital); Hanife Seyda Ulgur, Murat Kalın, Omer Faruk Ozkan, Muhammed Kadir Yildirak (University of Health Science Umraniye Education and Research Hospital); Semra Demirli Atici, Semra Salimoğlu , Burcin Abud, Bulent Calik, Erdinc Kamer, Eyup Kebabci, Ufuk Uylas, Eyup Kebabçı, Kenan Teker (University of Health Sciences Tepecik Training and Research Hospital); Guldeniz Karadeniz Cakmak, Fatma

Ayca Gultekin (Zonguldak Bulent Ecevit University The School of Medicine Research and Training Hospital).

**Uganda:** Okedi Francis Xaviour (Adjumani General Hospital); Otolia Isaac (Bukedea Health Centre IV); Turinawe Gaston (Hoima regional referral hospital); Daniel Asimwe, Bienfait Mumbere Vahwere, Franck Katembo Sikakulya (Kampala International University Teaching Hospital); Herman Lule (Kiryandongo Hospital); Henry Mark Lugobe (Mbarara Regional Referral Hospital); Hervé Monka Lekuya, Christine Namugenyi (Mulago Referral hospital); Ronald Kiweewa (St Francis Hospital Nsambya); Muhangi Bosco (St Francis Hospital Mutolere).

**Ukraine:** Ihor Yovenko (Medical Home Odrex); Viacheslav Kopetskyi, Bogdan Maksymenko (National Cancer Institute).

**United Arab Emirates (the):** Sattar Alshryda, Sabina A Khan, Amit Vasanttrao Padvi, Mohamed A Serour, Shamim Ahmad Beigh, Hisham M Elsayed, Awadelkarim O Mohamed, Vikram Somashekhar Basappanavar (Al Jalila Children's Speciality Hospital); Amna S Al-Wandi, Kareem S Khalil (Al-Qassimi hospital); Muhammad Umar Younis (Mediclinic City Hospital Dubai); Hayder S. Abdulhadi Al Saadi (Rashid Hospital); Ginan K Heidan (Sheikh Khalifa Medical City); Ravi K Trehan (Sheikh Shakhboub Medical City).

**United Kingdom of Great Britain and Northern Ireland (the):** Justin Davies, James Ashcroft, Grant D Stewart, Fanourios Georgiades, Amer J Durrani, Stephen J Price, Kai Yuen Wong, Amit Agrawal, Matthew KT Seah, Marwa M E Saad, Nicholas Segaren, Marios Ghobrial, Anita Balakrishnan, Parto Forouhi, Wasim S Khan, James Wheeler (Addenbrooke's Hospital); Andrew G Schache (Aintree University Hospital); Dimitrios P Katsikostas (Altnagelvin Area Hospital); Dimitrios Angelou (Antrim Area Hospital- Northern Health and Social Care Trust); Adam J Fell, Rana Madani (Ashford and St Peter's Hospital); Shiva Dindyal, Shaikh S Seraj, Premalatha Sharavanan, Muhammad R Iqbal, Shiva Dindyal (Basildon University Hospital); Nicholas J Wong (Bedford Hospital); William B Lo, Wai C Soon, Dalia Hammouche, Jonathan DE Lee, Max J Pacht (Birmingham children's hospital); Dinesh Alexander, Shoaib Ahmad (Blackpool Victoria Hospital); Hannah L Morley, David Selwyn, Jonathan Wareing, Vlasios Okseloglou, Peter Bobak (Bradford Royal Infirmary); Lisa S Rampersad, Mazin Mohamed, Mandeep Kaur, Antonios Athanasiou (Brighton and Sussex University Hospitals NHS Trust); Benjamin P Martin (Bristol Royal Hospital for Children); Tarik S Jichi, Tim JP Batchelor, Sophie Rozwadowski (Bristol Royal Infirmary); Sarveen Maniarasu (Causeway Hospital); Parisah K Seyed-Safi, Vladislav Kutuzov,

Hemina B Shah (Charing Cross Hospital); Toby M Noton , Nina Jyne Minette Dela Cruz, Neev Trehan (Chelsea and Westminster Hospital); Evripidis Tokidis (Chesterfield Royal Hospital); Matthew H V Byrne, Stuart C Winter (Churchill Hospital); Rui Pinto-Lopes, Aswathy Pavithran, Ahmad O Khalifa (Colchester Hospital University); Nicola J Eardley, Rami Ashour (Countess of Chester Hospital); Jacqueline D Steinke, Husayn D Esmail, Matthew N Bence, Samuel T Walters (Croydon University Hospital); Tosin O Akinyemi (University Hospital of North Tees), Funbi A Ayeni (Cumberland Infirmary); Sathya Lakpriya, Nader N Moawad, Pedram Panahi, Joshua Lau (Derriford Hospital); Stephen McAleer (Diana Princess of Wales Hospital Grimsby); Adeyinka Laoye (Doncaster and Bassetlaw Teaching Hospitals); Abdulzahra Abdulsamad Hussain (Doncaster Royal Infirmary); Muneeb Zafar, Mohammed H Elsheikh (Dumfries and Galloway Royal Infirmary); Daniel A Shaerf, Fiammetta Soggiu, Abaris Massoumi, Hemant D Sheth (Ealing Hospital); Fahed Gareb, Mark W Yao, Mubasher A Qamar (East Kent Hospitals NHS Foundation Trust); Clarissa E H Fang, Michael S Greenhalgh (East Lancashire Hospitals NHS Trust); Alexander Hunt (East Sussex Healthcare (Conquest hospital and Eastbourne District General Hospital)); Emmanuel O Oladeji, Miles W Benjamin, Philip Beak (Epsom & St Helier University Hospitals NHS Trust); Fraser J Rae, Joanna M S Aithie, Gareth W J Clarke (Forth Valley Royal Hospital); Darmarajah Veeramootoo (Frimley Health NHS FT - Frimley Park); Alex J Ashman, Ehab E Kahka, Tanvir Rafe (Frimley Health NHS FT - Wexham Park); PANNA K PATEL (Furness General Hospital); Hatim Albirnawi, Mark Katory, Ann Fisher, Sunil J Amonkar (Gateshead Health NHS Foundation Trust); Pawan Kumar Dhruva Rao (Glangwili General Hospital); David J Holroyd (Glasgow Royal Infirmary); Edward J Caruana, Andreas Gkikas (Glenfield Hospital); Lydia S Newton (Gloucestershire Royal Hospital); Alan J B Kirk (Golden Jubilee National Hospital); Ayesha Khalid (Good Hope Hospital); David Ferguson (Great Ormond Street Hospital for Children); Paul B Stanier, Vinay Shah (Great Western Hospital); Kariem El-Boghdadly, Alexis M P Schizas, Minahi Ilyas, Mark L George, Mark L George, Mothana Gawad, William D Groom, Mohammed Al-Azzawi, Julian CJ Ahluwalia (Guy's and St Thomas' Hospitals); Prakash P Punjabi (Hammersmith Hospital); Fang Yi Cheung (Hereford County Hospital); Michael D Wilson (Hillingdon Hospital); Claudia Gabriela Mitrofan, Yogeshkumar Malam, Adam Townson (Hinchingsbrooke Hospital); Mahmoud Loubani, Jih Dar Yau (Hull University Teaching Hospitals NHS Trust); Kevin Seebah (Ipswich Hospital); Enoch F Akowuah, Sreekumari Pushpoth R, Yirupaiahgari KS Viswanath , Kareem ElSanhoury, Misha Chew (James Cook University Hospital); Thomas E Walker (Jersey General Hospital); Almutasim Billah Elbagir Elhassan, Elizabeth Belcher, Matej Goricar, Hooman Soleymani majd, Dominic Knight, Lamiese Ismail, Chris McKinnon, Mario Ganau, Max Prokopenko, Neel S Doshi, Aikaterina Gkorila (John Radcliffe Hospital); Nomaan A Sheikh, Jessica R Helm, Mei Ken Low, Oluseyi



Harold Ogunfusika, George Bisheet, Tariq Alhammali, Ahmed Showki Arnob, Jatinder Singh, Emma L Allde, Sharan H Sambhwani (Kettering General Hospital); Manas Dube, Elizabeth H Gemmill, Joby John (King's Mill Hospital); Ioannis N. Gerogiannis, Mona A A Abuelgasim, Georgina Crate, Thomas J Holme, Anh T V Nguyen (Kingston Hospital NHS Foundation Trust); Michael W Ho, Ryckie G Wade, Azar Hussain, Paul Andrzejowski , Eugene Omakobia, Momin Eltayeb, Tsanko P Galabov, Tsanko P Galabov, Chung Yan Vernon Lee, Anum Nazir (Leeds General Infirmary); Oliver L Siaw, Robert U Ashford (Leicester General Hospital); Alex P Boddy, Christopher D Ashmore, Snehadhar M Shah, Benjamin T V Gowers (Leicester Royal Infirmary); Dinesh K Thekkinkattil, Dawit Worku, Sharan H Sambhwani (Lincoln County Hospital); Amer Harky (Liverpool Heart and Chest Hospital); Rishi Talwar, Harkiran K Sagoo, Periyathambi S Jambulingam (Luton and Dunstable University Hospital); Christopher J Smart (Macclesfield District General Hospital); Daniel T Doherty (Manchester Royal Infirmary); Sotiris Mastoridis, Sidharth Kumar, Rana Mahmoud (Milton Keynes University Hospital); Francesca Solari, Richard J Egan, Jonathan D Barry (Morrison Hospital Swansea); Jo Morrison, Kaveh Davoudi, Marianne Hollyman, Andrew Kelly, Thomas F Badenoch (Musgrove Park Hospital); sanjay pandanaboyana, Rebecca J Critchley (Newcastle Upon Tyne Hospitals NHS Foundation Trust); Varun R Sarodaya (Newham University Hospital); Robert J H Sinnerton, Jaiganesh Manickavasagam, Elizabeth F Lindsay (Ninewells Hospital); Ankita Arora, Raashad Hasan, Ignatius Liew, Joshua Ozua, Vasileios Kouritas, Rachael V Collins, George H Lafford (Norfolk and Norwich University Hospital); Charlie Moret (North Manchester General Hospital); Chung Shen Chean (Northampton General Hospital); Liam F Horgan, Avinash Aujayeb (Northumbria NHS Hospital Trust); Muhammad Harris Siddique, Lalin Navaratne, Sanjeev Kotecha, Vittoria Bellato, Lalin Navaratne , Sophia E Lewis, Muhammad Usman Ali , (Northwick Park Hospital); Ben A Marson (Nottingham Children's Hospital); Simon Craxford, Ketankumar Gajjar, Elena Theophilidou (Nottingham City Hospital); Tariq Aboelmagd, Harman Khatkar, Mario Ganau (Nuffield Orthopaedic Centre); Mahmoud A Awadallah, Jose A Blanco (Peterborough City Hospital); Tsitsi G Chituku (Pilgrim Hospital); Oliver GB Dixon, Janahan sarveswaran , (Pinderfields Hospital); Imogen S Jones (Poole Hospital); Salah Hammouche, Vardhini Vijay (Princess Alexandra Hospital); Rucira Ooi, Rahi Karmarkar (Princess of Wales Hospital, Bridgend); Tahir Khaleeq (Princess Royal Hospital); Mohit Bhatia, Badr L Al-Khazaali, Audrina Daadipour , Ahmed Mattar, Tarun Singhal (Princess Royal University Hospital); Moustafa Ibrahim Mahmoud (Queen Alexandra Hospital); James Glasbey, Paul C Nankivell, Maninder S Kalkat, Shahd Nour, Andrew D Beggs, Danylo Y Yershov, Shafiq Ahmad Chughtai (Queen Elizabeth Hospital Birmingham); Hesham Youssef, Alan R Norrish (Queen Elizabeth Hospital King's Lynn); Mohammed M Mohammed, Adam M Gwozdz (Queen Elizabeth Hospital, Woolwich);

Michalis P. Charalambous (Queen Elizabeth the Queen Mother Hospital Margate); Stephen R Knight, James A McCaul, Elsie A Bridgman, Mustafa El Sheikh, Akinsola Ogunbowale , Evan O Wright (Queen Elizabeth University Hospital); Usama Ahmed, Hafsa Younus, Laura G Tincknell, Ken Weixing-Ho (Queen's Hospital Romford); Charis Demetriou, Mohammed Hussei, John-Joe Reilly (Queens Medical Centre); Anil P Hormis (Rotherham District General Hospital); Susan J Moug (Royal Alexandra Hospital); Fitzgerald C Anazor, Edward A Horwell, Gregory Neal-Smith, John M McNamara , Kwaku W Baryeh (Royal Berkshire Hospital); Khalid M Bhatti (Royal Blackburn Hospital); Joseph E McKay (Royal Bolton Hospital); Maria G Cannoletta (Royal Bromtpon Hospital); Clare J Perkins, Sivakumar Gopalswamy, Anna F Sheldon, Joseph B John, Mark Mantle , Bogdan Toia (Royal Cornwall Hospital); Andrew J Phillips, Waleed Al-Khyatt, Jonathan N Lund, Ahmed Y Ammar (Royal Derby Hospital); Hans Lederhuber, Guang H Yim, Daniel A Huntley, Ian R Daniels, Joao Valverde, Edward David John Lumley, Thomas J Walton (Royal Devon and Exeter Hospital); Dimitri A Raptis, Nikolaos Dimitrokallis, Arjun Nathan, Reza Motallebzadeh, Shihab Chowdhury, Rezwan F A Ahmed, Reza Mirnezami (Royal Free Hospital); Tamas Szakmany, Dominic J Knight, Waheeb Al-Azzani (Robert Jones and Agnus Hunt Orthopaedic Hospital); Huw R Davies (Royal Glamorgan Hospital); Setthasorn Zhi Yang Ooi, Khaing K Oo (Royal Gwent Hospital); Paul S Cullis (Royal Hospital for Children & Young People Edinburgh); Ed Peng (Royal Hospital for Children Glasgow); Andreas K Demetriades, Andrew L Tambyraja , Michael TC Poon, Thomas M Drake, Paul M Brennan, Dimitrios Oikonomou (Royal Infirmary of Edinburgh); Samuel E Newman, Louise Le Blevec (Royal Lancaster Infirmary); Mohamed Otify, Peter Szatmary, Bhavesh Devkaran, Dana Sochorova (Royal Liverpool University Hospital); Catrin Sohrabi, Rajesh Sivaprakasam, Mingzheng Aaron Goh, Kate V Atkinson, Delvene Soares, Daniela Prce, Johnathon P Cann, Amy C Grobbelaar, Rebecca Bradley, Helen J Strauss, Ahmed Taha, Annamaria Minicozzi , Mary L Venn, Rajesh Sivaprakasam , Bhaskar Thakur (Royal London Hospital); Abdullah Hanoun, Poornanand Goru (Royal Manchester Children's Hospital); Rachel M Baumber, Anshul S Sobti, George WV Cross (Royal National Orthopaedic Hospital); Tom Havenhand, George A Antoniou (Royal Oldham Hospital); Govind Singh Chauhan (Royal Orthopaedic Hospital); Ismail Vokshi (Royal Papworth Hospital); Ayesha Mahmud, Erminia Albanese, Daisy Evans (Royal Stoke University Hospital); Thumuluru Kavitha Madhuri, Jonathan D Horsnell, Pardis Zalmay (Royal Surrey NHS Foundation Trust); Mazin Mohamed (Royal Sussex County Hospital); Angharad J Davies (Royal United Hospital Bath); Firas Aljanadi, Reubendra Jeganathan, Mark Jones, Christos Kakos (Royal Victoria Hospital); Raghavan vidya, Alaa El-Ghobashy, Ahmed M Habib, Jeremy P Reid, Harshadkumar Dhirajlal Rajgor (Royal Wolverhampton NHS Trust); Omar Ahmed (Russell's Hall Hospital); Graham Branagan (Salisbury NHS Foundation Trust); Ali Yasen Y

Mohamedahmed, Shahd Nour (Sandwell General Hospital); Ali Al-Sabbagh (Scunthorpe General Hospital); Govind Chetty, Clive J Kelty, Yasin A M EL-Wajeh, James E Tomlinson, John G Edwards, Ola Rominiyi, Saurabh Sinha, Sanad Saad (Sheffield Teaching Hospital NHS Foundation Trust); Banchhita Sahu (Shrewsbury and Telford Hospitals); Vasileios Charalampakis (South Warwickshire NHS Foundation Trust); Ibrahim Enemosah, Simon J Williams, Hassan N Yaqoob (Southampton General Hospital); Edward P Laurent (Southend University Hospital); Joshua L Moreau, Rhiannon Frostick, Hammad Parwaiz, Karim Aboelmagd, Dimitri J Pournaras, Kalina H Hristova (Southmead Hospital); Karthikeyan. P. Iyengar, Muyed Mohamed, Dmitri Y Artioukh (Southport and Formby District General Hospital); Sibtain Anwar, Mostafa K A Hussein (St Bartholomew's Hospital); Tomisin S Omogbehin, Jonathan B T Herron, Amir Labib, Preemal Patel, Samuel C Marsden, Roshana Mehdian, Gowthanam Santhirakumaran, Jeremy Smelt (St George's Hospital); Ketan Agarwal (St Helens and Knowsley Teaching Hospitals NHS Trust); Antonios Athanasiou (St James's University Hospital Leeds); Luca Lancerotto (St Johns Hospital); Kapil Sahnan (St Mark's Hospital); Joseph Shalhoub, Liam J Donnelly, Simon Erridge, Swathikan Chidambaram, Xun Luo (St Mary's Hospital); Sujesh Bansal (Saint Mary's Hospital, Manchester); Neil AJ Ryan (St Michael's Hospital); Alexander C D Smith (St. Andrews Centre for Plastic Surgery and Burns, Broomfield); Michael Flatman, Imad Wafaie, Muhammad Isfandyar Khan Malik (Stepping Hill Hospital); Ruben P Thumbadoo, Shoaib F Hussain (Buckinghamshire Healthcare NHS Trust); Christin Henein (Sunderland Eye Infirmary); Yousif T Hamad, Ajay P Belgaumkar (Surrey and Sussex Healthcare NHS Trust); David C Bosanquet (The Grange University Hospital); Angelos G Kolias, David Choi, Hani J Marcus, Hugo RM Layard Horsfall, Danyal Z Khan (The National Hospital for Neurology and Neurosurgery); Arun Sahni (Mid and South Essex NHS Foundation Trust); Christopher P Millward, Luke Render, Adam Truss, Tarek Elmoslemany (The Walton Centre NHS Foundation Trust); Chetan Parmar (The Whittington Hospital); Joseph Hanger, Jonathon Sheen (Torbay and South Devon NHS Trust); Jaideep S Rait (Tunbridge Wells Hospital); Jennifer Foreman (Ulster Hospital Dundonald); Natalie Marzouqa, Andreas Fontalis, Grigorios Voulalas, Ryan Chin Taw CHEONG, Sanjay Dindyal (University College London Hospital); Sathyaseelan Arumugam (University Hospital of North Durham); Thomas R W Ward, Alastair S Stephens, Eleftheria Douka (University Hospitals Coventry and Warwickshire NHS Trust); Ayesha Mahmud, Ahmad K Abou-Foul, Siobhan C McKay, Mark O Kitchen (University Hospitals of North Midlands); Oliver DJ Rees-Stoner, Supriya Balasubramanya (University Hospitals Plymouth); Muhammad Adeel Akhtar, Andrew J Warwick (Victoria Hospital Kirkcaldy); Shweta Pawar (Walsall Manor Hospital); Vivek Dubey (Watford General Hospital); Mustafa W Al-Yaseen (West Hertfordshire Hospitals NHS Trust); Christopher Y.K. Williams (West Suffolk Hospital); Alexander Laird (Western

General Hospital, Edinburgh); Kandaswamy Krishna, Ngozi S Anyaugo, Obafemi K Wuraola (Weston General Hospital); Funlayo Odejinmi (Whipps Cross University Hospital); Joanna M Craven, Charlotte L West, Reece A Barter (Whiston Hospital); Devaraj M Navaratnam (William Harvey Hospital); Shahbaz S Malik, Vimaladhithan Mahendran, Miguel Zilvetti, Richard E Lovegrove (Worcestershire Acute Hospitals NHS Trust); Tim N Board, Moez Zeiton (Wrightington, Wigan & Leigh NHS Foundation Trust); Safdar A Sarwar, Sarah E Duff, Elmuiz A. Hsabo (Wythenshawe Hospital); Poormanand Goru (Manchester University NHS Foundation Trust), Ceejay Ochukpue, Elaine Borg, Alex J Wilkins (York Teaching Hospitals NHS Trust); Ashwani Kumar Nugur, Richard M Morris, Anil K Lala (Ysbyty Gwynedd), Manas K Dube (Kings Mill Hospital).

**United States of America (the):** Rita O Kwan-Feinberg (Alta Bates Summit Medical Center (Sutter Health)); Samuel W. Ross (Atrium Health Carolinas Medical Center); Jeremy A Dressler (Beth Israel Deaconess Medical Center); Craig D. McClain, Faye M. Evans (Boston Children's Hospital); Shaun E L Wason, Keianna R. Vogel; Joanna C. Wang (Boston Medical Center); Megan L Sulciner, Sameer Hirji (Brigham and Women's Hospital); Mustafa Raoof (City of Hope National Medical Center); Christopher J Wolff (Cleveland Clinic Akron General); Ilan kent (Cleveland Clinic Florida); Alparslan Turan (Cleveland Clinic Foundation); Pedro G Teixeira, Kristofor A Olson (Dell Seton Medical Center at the University of Texas); Neil D Patel (CHI Health Creighton University Medical Center Bergan Mercy); Vijay Krishnamoorthy, Dimitrios Moris, Henry E. Rice, Hesham Gabr (Duke University Medical Center); Savni R Satoskar (Easton Hospital); Christine A Castater (Grady hospital); Manal Jmaileh (Harborview Medical Center); Rachel E Payne (Hennepin Healthcare); David S Kwon (Henry Ford Hospital); Shahram Aarabi (Highland Hospital); Pedro F Escobar (Instituto Ginecooncologico); Joshua P Kronenfeld (Jackson Memorial Hospital); Michael K. Dalton (Rutgers New Jersey Medical School); Eric W Etchill, Elliott R Haut, Dominique Vervoort (Johns Hopkins Hospital); Ahmed Dehal (Kaiser Permanente Panorama City Medical Center); Mark McKenney, Adel Elkbuli (Kendall Hospital); Ankush Gosain (Le Bonheur Children's Hospital); Zaid M Abdelsattar (Loyola University Medical Center); Matthew R Naunheim, Ciersten A Burks, Allen S Zhou (Massachusetts Eye and Ear); Marilyn Heng, Shady Abohashem, Santiago A. Lozano-Calderón (Massachusetts General Hospital); Janani S. Reisenauer (Mayo Clinic); Nicolas J Mouawad (McLaren Bay Region); Thomas M Diehl (University of Wisconsin); Evert A Eriksson (Medical University of South Carolina); Jayson S Marwaha (Medstar Washington Hospital Center); Thomas J. Schroepel (UCHealth Memorial Hospital Central); Christopher J LaRocca (Minneapolis VA Medical Center); Grace H Chang (Mount Sinai Hospital); Romana Hassan (Nassau University Medical Center); Lauren B Nosanov

(NewYork-Presbyterian / Weill Cornell Medical Center); Jennifer L Rickard (North Memorial Medical Center); Jacob B Avraham (NorthShore University HealthSystem); Patrizio Petrone (NYU Langone Hospital–Long Island); Joseph J Sferra (ProMedica Toledo Hospital); Joseph Hadaya (Ronald Reagan UCLA Medical Center); Brittany S Mead (Rush University Medical Center); Jason S Hauptman (Seattle Children's Hospital); Maleeha Ahmad, Antonio Meola, Steven D Chang, Ara Ko (Stanford University Hospital); Katherine E Specht (Sunrise Hospital); Asad Choudhry, Ronald Zerna Encalada (SUNY Upstate University Hospital); Juan L Poggio (Temple University Hospital); Hang Xing (Rhode Island Hospital); Nina E Glass (The University Hospital, Newark); Robert Hooker (Banner Medical Center, Tucson) Rachael A Callcut, Deborah S Keller (UC Davis Medical Center); Paulo N. Martins, Erin M. Scott (UMass Memorial Hospital); Brittany K. Bankhead (University Medical Center Lubbock); Emmanouil Giorgakis, Joe Nigh, Tamara Osborn (University of Arkansas for Medical Sciences); Erika L Tay Lasso (University of California Irvine); Daniel M Beswick (University of California Los Angeles); Allison E Berndtson (University of California San Diego); Krista L Kaups, Lee-lynn Chen, Michael S Farrell, Marissa A Boeck (University of California San Francisco, UCSF); Dennis M Vaysburg, Al-Faraaz Kassam, Kevin M Turner (University of Cincinnati Medical Center); Adam R Dyas, Julia R Coleman (University of Colorado Anschutz Medical Campus (CU Anschutz)); Megan Folsom, Christopher M. Lam, Sean C Kumer, Kelsey Larson, Scott Turner, Christopher Guidry, Madhuri Reddy, German Berbel, Austin Findley, David Beahm, Andres Bur, Derek Marlor, Corey Houndschell, Shea Carver, Alissa Ulrich (University of Kansas Medical Center); Neal Bhutiani (University of Texas MD Anderson Cancer Center); Laura DiChiacchio, Hossam Abdou (University of Maryland Medical Center); Lena M. Napolitano (University Of Michigan Medical Center); Rahel Ghebre (University of Minnesota Medical Center); Gary Alan Bass, Lewis J Kaplan, Niels D Martin, Caoimhe C Duffy (University of Pennsylvania Hospital System); Sultan S Abdelhamid (University of Pittsburgh Medical Center); Brian J. Daley (University of Tennessee Medical Center); Christina L. Roland (University of Texas MD Anderson Cancer Center); Ryan P Dumas, Vin Shen Ban (University of Texas Southwestern); Aashish Rajesh, Mark G. Davies (UT Health San Antonio); Prabhudev P Purudappa (VA Medical Center, Boston); Christopher JD Wallis, Camila B Walters (Vanderbilt University Medical Center); Nicole Lin (Westchester Medical Center); Nensi M Ruzgar, Sarah J Ullrich (Yale New Haven Hospital).

**Uruguay:** Ivan Trostchansky (Hospital De Clinicas); Fernando Bonilla-Cal (Hospital Espanol); Fabiola Castedo, Helena Sobrero, Gastón Acuña, Sofía M. Álvarez , Josefina Tarigo, Ana C Carbajal, Ana Carbajal (Hospital Pereira Rossell).

**Venezuela (Bolivarian Republic of):** Antonio R Reyes (Hospital Universitario de Coro).

**Yemen:** Fatima A Al-Eryani, Nardeen N Alqousi (Al-Kuwait University Hospital); Zainab Alattas, Rafat A Al-Saban, Mohammed M. Al-Shehari, Nawal T ALHammedi, Sarah A Shream, Hamza M Al-Naggar, Lina M Al-Qalisi, Areej E Nadeesh, Hytham H Al-Samawi, Hadeel M Bajjah, Saba A AL-Ameri, Jamal F Albably, Rana A Ghannam, Amatallah H Shamsan, Abdullah A Meead, Riham Q Al- Zubaidi, Mohammed A Zulait, Halah Najeeb, MUSAED M ALSAYADI, Seham K Al-Mashreqi, Najla A Al-Jomai, Ramzi A Alsayadi, Moath M Al-Naggar, Hassan A Almarashi (Al-Thawra Modern General Hospital); Hasna M Musaeed (Mother and Child Hospital); Ibrahim M Al-Raimi , Hossam N Ghanem, Karim A Al-Zazay, Shehab A AL-Mahdi (University of Science & Technology Hospital); Amatalaleem S Almontaser (Yemen Al-Saeed Hospital).

**Zambia:** Vanessa A. S Savopoulos (Levy Mwanawasa University Teaching Hospital); James Munthali, Kizito M. C Kabongo (University Teaching Hospital. Lusaka).

**Zimbabwe:** Willard Mushiwokufa (Gweru Provincial Hospital); Allan Ngulube, Crispin Ntoto , Praise T Magama, Daniel Dzinotywei, Shelton K Chivanga, Ngqabutho S Dube, Ernesto C Sanchez, Shelton K Chivanga, Assel T Moyo (Mpilo Central Hospital); Antony Chengahomwe (Parirenyatwa Hospital); Simbarashe Chinyowa (Sally Mugabe Central Hospital); Maphios Siamuchembu, Maphios Siamuchembu, Tafadzwa Bondera, Trust Mushawarima (United Bulawayo Hospitals).

## **Appendix B. Full methodology for the international consultation process**

The overall methodology and results for the consultation process using a Delphi consensus methodology are summarised in Figure 1.

### *Longlisting*

During longlisting, the international index development group (IIDG) were asked to submit potential indicators for inclusion during the longlisting process. They were asked to consider features of their local hospitals that they thought were plausibly associated with that hospital's ability (or lack thereof) to maintain capacity for planned surgery during periods of external system 'shock', using the SARS-CoV-2 pandemic as a key exemplar. The free-text responses underwent thematic content analysis with double coding by two independent researchers (JG, JS) to identify distinct indicators. These were then compared and combined where themes overlapping, with care not to lose meaning. Where any uncertainty existed with overlapping themes the perspective of the submitting development group member was sought and a final decision was made with the support of a third researcher (AB). Additional indicators were extracted from relevant systematic review, indicator, and framework development studies for whole health-system resilience (11, 30, 41, 42). All candidate indicators identified in this thematic analysis were included in Round 1 electronic voting.

### *Round 1. Electronic voting round*

In Round 1, candidate indicators were added to an online questionnaire hosted in an electronic data capture system (REDCap) at the University of Birmingham. All response data to the prioritisation survey was stored on encrypted, secure Research Electronic Data Capture (REDCap) server hosted by the NIHR Global Health Research in Global Surgery at the University of Birmingham. Data were anonymised before analysis and held in accordance with EU General Data Protection Regulation (GDPR) recommendations.

Indicators were presented in a different random order to each participant to minimise primacy bias. Round voting was distributed to the existing IIDG. The purpose of the voting in Round 1 was to screen out candidate indicators that were not deemed to be important, not easy to measure, and to identify indicators that required re-wording to improve their clarity and global relevance. Respondents were asked two questions about each indicator with a continuous item response variable:

- (1) Whether the indicator was important to hospital preparedness (0 = not at all important, 100 = very important)
- (2) Whether the indicator would be easy to measure (0 = very difficult to measure, 100 = very easy to measure)

Dropping rules for indicators were predefined; if an indicator had a mean overall importance rating of <70 or ease of measurement <70 it continued moved into Round 2 discussion, and Round 3 voting. If an indicator had a mean overall importance and ease of measurement it was accepted into the SPI and underwent refinement during Round 4 discussion.

#### *Round 2. Virtual focus group meeting with IIDG*

Round 1 voting results were reviewed by the IIDG at virtual focus group meeting using Zoom (Zoom corporation®, Chiyoda City, Tokyo, Japan) on 23 March 2021. The panel were asked to specifically re-considered whether the indicators were likely contribute to hospitals' ability to maintain planned surgery volume (preparedness as defined in this study), and whether voting reflected any inconsistency or uncertainty in the item wording. Free-text responses were used to iteratively refine indicators to improve clarity and consistency for an international audience. For each draft indicator the panel formed a consensus on which of the following decisions to take:

- To accept it with its current wording.



- To accept it following re-wording aimed at either reducing its ambiguity, or maximising its relevance. When appropriate, the panel combined separate draft statements into single indicators.
- To eliminate it entirely.

The refined indicator set were moved into Round 3 voting.

#### *Round 3. Electronic voting round*

Round 3 consensus voting which was also performed online using REDCap and was closed survey distributed to all respondents to Round 1 voting. Respondents indicated whether they perceived the indicator to be essential (baseline measures that should be implemented as a priority), desirable (some hospitals may lack relevant resources at present, in which case they should plan for future implementation) or remove (not essential to hospital preparedness, or too challenging to implement). Where greater than 50% of respondents voted an indicator to be essential, this was included in the final SPI. Where more than 10% of respondents voted for an indicator to be removed, this was dropped. Where indicators did not meet either of these thresholds they went on to further discussion in the Round 4 focus group.

#### *Round 4. Virtual focus group meeting with IIDG*

Round 3 voting results were again reviewed by the IIDG at virtual focus group meeting on 12 May 2021. For indicators that had not yet reached a threshold, the panel formed a consensus on whether:

- To accept it with its current wording.
- To accept it following re-wording aimed at either reducing its ambiguity, or maximising its relevance.
- To eliminate it.

Free text responses were again used to continue iterative development of the overall indicator set. The final SPI was agreed by the IIDG, and continued into the hospital assessment phase. In this phase the development group also considered how they would rate the strength of a local surgical system in accordance with each indicator. After an ideas generation phase, these were clarified and refined, before the group made a pragmatic decision on item responses and scaling to be adopted in hospital assessment.
